# Supplementary material for: “Hot exciton” fluorescence and charge transport of fine-tuned twistacenes: theoretical study on substitution effect and intermolecular interactions
Source: Royal Society of Chemistry journal article supplement (doi:10.1039/d2nj05560k), 2023-01-01
Supplement: d2nj05560k1.pdf [file d2nj05560k1.pdf]

Electronic Supplementary Information (ESI) for New  
Journal of Chemistry.

“Hot exciton” Fluorescence and Charge Transport  
of Fine-Tuned Twistacenes: Theoretical Study on  
Substitution Effect and Intermolecular Interactions

Xiaoye Wei,<sup>1</sup> Ziyang Liu,<sup>1</sup> Kaixuan Zhang,<sup>1</sup> Zilin Zhao,<sup>1</sup> Wei Zhang,<sup>1</sup> Qian Han,<sup>1</sup> Gang Ma,<sup>1</sup>  
and Chunfang Zhang<sup>1,\*</sup>

<sup>1</sup>College of Chemistry and Environmental Science, Hebei University, Baoding, 071002

\* Electronic mail: [zhangcf@hbu.edu.cn](mailto:zhangcf@hbu.edu.cn)

| SI. NO.               | Table of Contents                                                                                                                                                                                                                                      | Page NO. |
|-----------------------|--------------------------------------------------------------------------------------------------------------------------------------------------------------------------------------------------------------------------------------------------------|----------|
|                       | Computational Details.                                                                                                                                                                                                                                 | S4-S5    |
| <b>Scheme S1</b>      | (a) Chemical structures of 1-H and its derivatives (b) The geometrical configuration of 3a, 3b, 3c and 3f.                                                                                                                                             | S6       |
| <b>Scheme S2</b>      | The un-optimized initial conformation of dimers.                                                                                                                                                                                                       | S7       |
| <b>Scheme S3</b>      | Molecular stacking patterns.                                                                                                                                                                                                                           | S8       |
| <b>Figure S1</b>      | Intuitive picture of comparing the ground state geometries for 1-H and its derivatives.                                                                                                                                                                | S9       |
| <b>Figure S2-S7</b>   | Inter-molecular electron and hole mobilities and critical geometrical parameters of 1-H and its derivatives along P, P1, L, L1, V and V1 stacking modes, respectively.                                                                                 | S10-S15  |
| <b>Figure S8-S13</b>  | Interaction region indicator (IRI) of chemical bonds and weak interactions for the 1-H and its derivatives dimers at P, P1, L, L1, V and V1 stacking directions, respectively.                                                                         | S16-S21  |
| <b>Figure S14-S25</b> | Energy levels of HOMOs and LUMOs at B3LYP/6-311G** level for 1-H and its derivatives dimers along P, P1, L, L1, V and V1 stacking directions, respectively.                                                                                            | S22-S33  |
| <b>Figure S26-S31</b> | TD-DFT spectra at B3LYP/6-311G** level for 1-H and its derivatives dimers along P, P1, L, L1, V and V1 stacking directions, respectively.                                                                                                              | S34-S39  |
| <b>Table S1</b>       | Benchmark calculation to get the proper computational levels.                                                                                                                                                                                          | S40      |
| <b>Table S2</b>       | The twisted angles between the pyrene moiety and naphthalene unit of 1-H and its derivatives.                                                                                                                                                          | S41      |
| <b>Table S3</b>       | Computational energies at B3LYP/6-311G** level for 1-H, 1-CH <sub>3</sub> , 1-OH, 1-OCH <sub>3</sub> , 1-NH <sub>2</sub> , 1-F, 1-CN and 1-NO <sub>2</sub> and the corresponding binding energies for the dimers along six different stacking patterns | S42-S43  |
| <b>Table S4</b>       | The twisted angles between the pyrene moiety and naphthalene unit of each molecule of the dimers for 1-H and its derivatives.                                                                                                                          | S44-S45  |
| <b>Table S5</b>       | TD-DFT results at B3LYP/6-311G** level for the three lowest-lying singlet states for 1-H and its derivatives.                                                                                                                                          | S46-S47  |
| <b>Table S6</b>       | The S1/S0 difference of twisting angles which are defined as $\Delta\theta =  \theta(S1) - \theta(S0) $ .                                                                                                                                              | S48      |

|                      |                                                                                                                                                                                                                                      |         |
|----------------------|--------------------------------------------------------------------------------------------------------------------------------------------------------------------------------------------------------------------------------------|---------|
| <b>Table S7</b>      | Second-order perturbation theory analysis of the Fock matrix based on NBO for 1-H and its derivatives.                                                                                                                               | S49     |
| <b>Table S8</b>      | The optimized twisting angles ( $\theta_1$ , $\theta_2$ , $\theta_3$ , $\theta_4$ and $\theta_5$ in degrees,) and bond lengths ( $l_1$ , $l_2$ , $l_3$ , $l_4$ and $l_5$ in Å) of 1-H and its derivatives in their S1 and T2 states. | S50     |
| <b>Table S9-S11</b>  | Hole and electron NTOs for the optimized S1 and T2 states of 1-H and its derivatives.                                                                                                                                                | S51-S53 |
| <b>Table S12</b>     | Intramolecular hole and electron mobilities of 1-H and its derivatives.                                                                                                                                                              | S54     |
| <b>Table S13</b>     | Intermolecular hole and electron mobilities of 1-H and its derivatives in different stacking patterns.                                                                                                                               | S55-S57 |
| <b>Table S14-S19</b> | The electronic coupling terms, reorganization energies and transport rate constants of 1-H and its derivatives at different stacking patterns.                                                                                       | S58-S63 |
| <b>Table S20</b>     | Cartesian coordinates for the optimized species at B3LYP/6-311G** level.                                                                                                                                                             | S64-S81 |

## Computational Details.

**(R)ISC Rates.** For the S1 and T2 states,  $\lambda$  could be formulated as,

$$\begin{aligned}\lambda_s &= E_{S1}(\text{T2-geometry}) - E_{S1}(\text{S1-geometry}) \\ \lambda_T &= E_{T2}(\text{S1-geometry}) - E_{T2}(\text{T2-geometry})\end{aligned}\quad (1)$$

where  $E_{S1}(\text{T2/S1-geometry})$  is the S1 energy at T2/S1 minimum geometry, and  $E_{T2}(\text{S1/T2-geometry})$  is the T2 energy at S1/T2 minimum geometry.

**Carrier Mobility.** Based upon Koopmans' theorem,  $V$  can be obtained by the energy splitting of the frontier or near-frontier molecular orbitals. Thus, intramolecular and inter-molecular electronic couplings  $V$  for hole and electron are calculated from energies as follows,

$$\begin{aligned}V_h &= \frac{(E_{\text{HOMO}} - E_{\text{HOMO-1}})}{2} \\ V_e &= \frac{(E_{\text{LUMO+1}} - E_{\text{LUMO}})}{2}\end{aligned}\quad (2)$$

where  $E_{\text{HOMO}}$ ,  $E_{\text{HOMO-1}}$ ,  $E_{\text{LUMO}}$  and  $E_{\text{LUMO+1}}$  is the energy of HOMO, the nearest doubly occupied molecular orbital below HOMO, LUMO and the nearest unoccupied molecular orbital above LUMO for the molecules or their dimers, respectively. Meanwhile,  $\lambda$  is calculated from electronic energies as follows:

$$\begin{aligned}\lambda_h &= E(\text{Ar}^+ / \text{Ar}) - E(\text{Ar}^+ / \text{Ar}^+) + E(\text{Ar} / \text{Ar}^+) - E(\text{Ar} / \text{Ar}) \\ \lambda_e &= E(\text{Ar}^- / \text{Ar}) - E(\text{Ar}^- / \text{Ar}^-) + E(\text{Ar} / \text{Ar}^-) - E(\text{Ar} / \text{Ar})\end{aligned}\quad (3)$$

where Ar, Ar<sup>+</sup> and Ar<sup>-</sup> represent the molecules or species with neutral, +1 and -1 charges, and  $E(\text{Ar}^+/\text{Ar})$ ,  $E(\text{Ar}^+/\text{Ar}^+)$ ,  $E(\text{Ar}/\text{Ar}^+)$ ,  $E(\text{Ar}^-/\text{Ar})$ ,  $E(\text{Ar}^-/\text{Ar}^-)$ ,  $E(\text{Ar}/\text{Ar}^-)$ , and  $E(\text{Ar}/\text{Ar})$  represent the single point energy of the cationic molecule with the optimized neutral geometry, the energy of the optimized cationic geometry, the single point energy of the neutral molecule with the optimized cationic geometry, the single point energy of anionic molecule with the neutral geometry, the energy of optimized anionic geometry, the single point energy of neutral molecule with the anionic geometry, and the energy of the optimized neutral geometry, respectively.

The charge carrier mobility is obtained according to the Einstein equation, and is expressed as,

$$\mu = \frac{eD}{k_B T} \quad (4)$$

$$D = \frac{r^2 k}{2} \quad (5)$$

In which  $e$  is the charge of an electron,  $D$  is the diffusion parameter,  $r$  is the intramolecular distance from the centre of mass of benzo[f]tetrathene to the substituents for monomers or intermolecular CM distance (or benzene ring and substituent group or two benzene rings) between two neighbouring molecules.

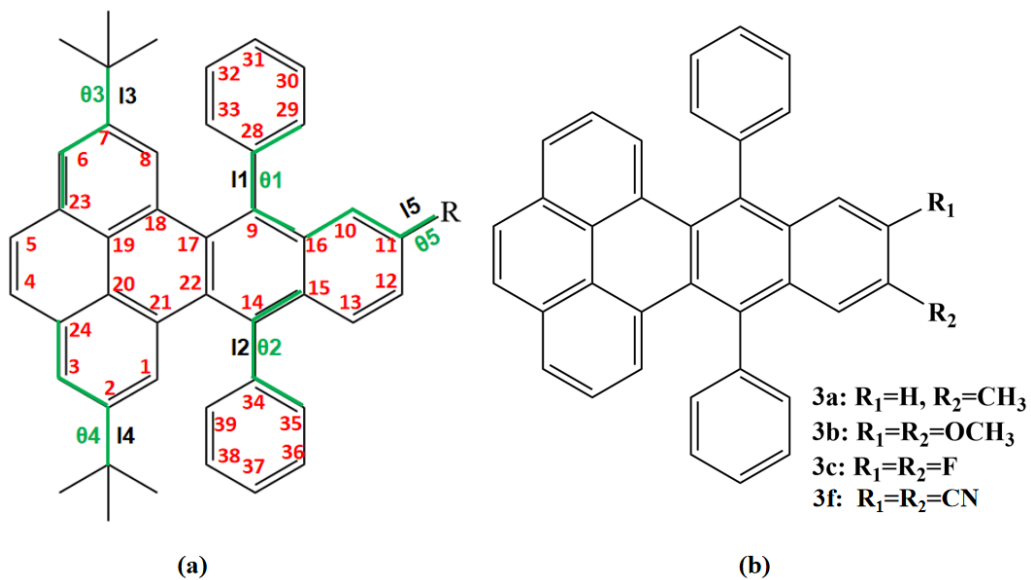

**Scheme S1.** Chemical structures of (a) 1-H and its one substituent replaced derivatives at 11-position (R=H, CH<sub>3</sub>, OH, OCH<sub>3</sub>, NH<sub>2</sub>, F, CN, NO<sub>2</sub>) and (b) 3a, 3b, 3c and 3f in Ref.

[*Dyes Pigments* 2015, **112**, 176-182].

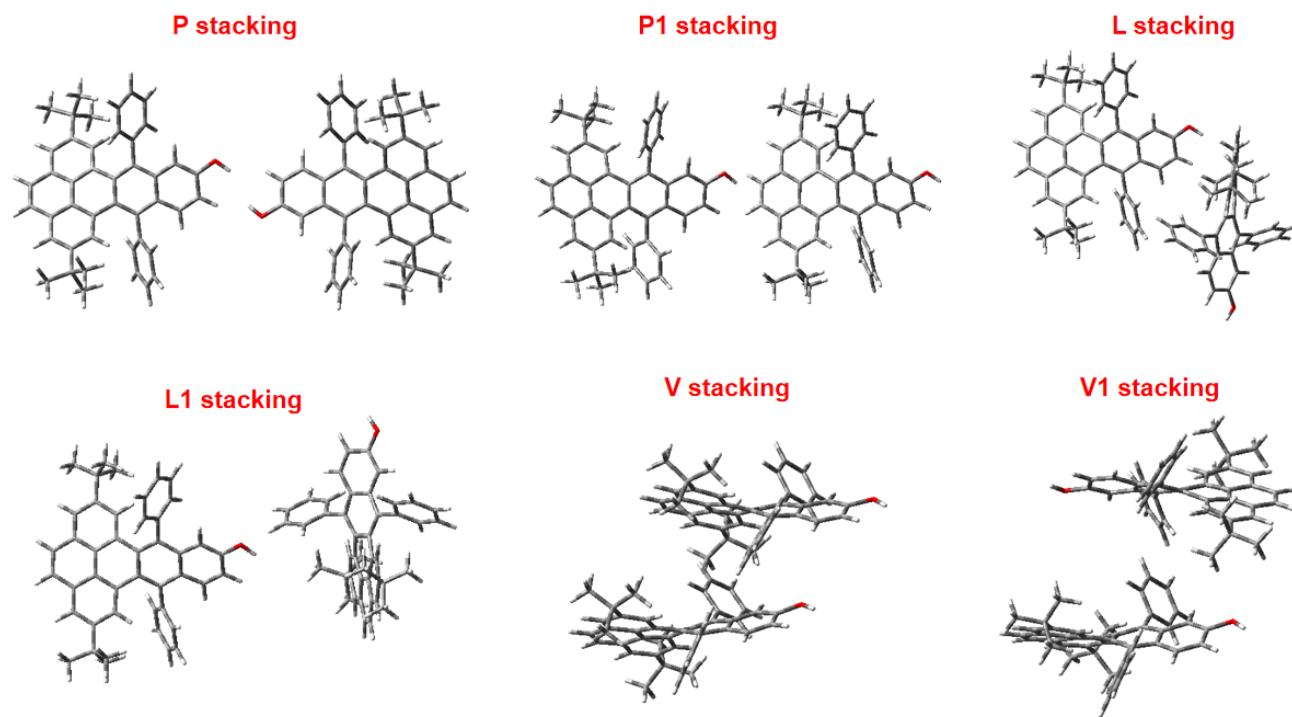

**Scheme S2.** The un-optimized initial conformation of dimers.

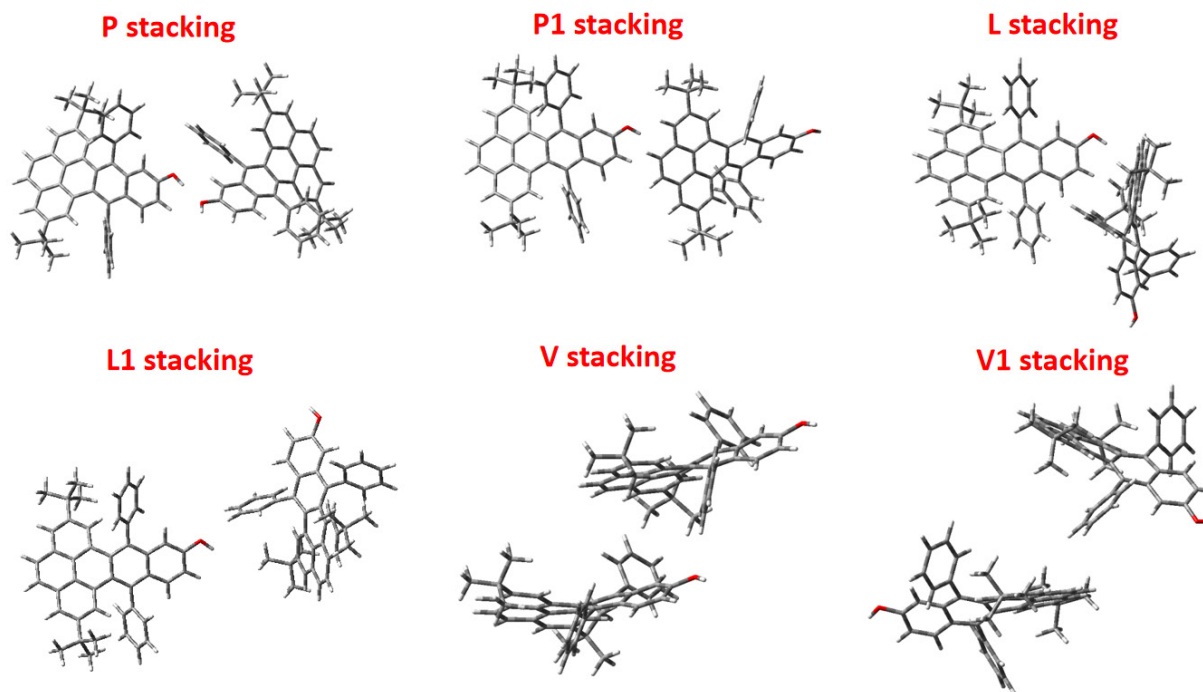

**Scheme S3.** Molecular stacking patterns, where the two molecules with the substituents arranged in a head-to-head parallel was designated as P stacking, the substituents displaced in a head-to-tail parallel as P1, the benzo[f]tetraphene frame arranged in herringbone way as L, benzo[f]tetraphene arranged in L shape as L1 and benzo[f]tetraphene displaced vertically as V, pyrene units arranged vertically as V1, respectively. All of these dimers were optimized at B3LYP/6-311G\*\* level.



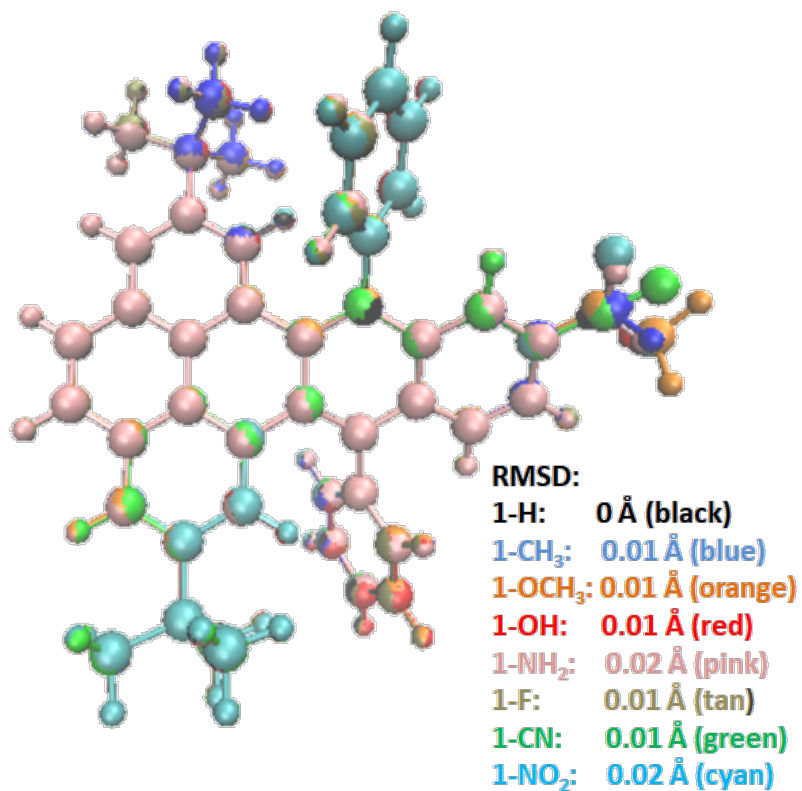

**Figure S1.** Intuitive picture of comparing the ground state geometries for 1-H and its derivatives. The root mean square displacement (RMSD) is listed on the right. (Black, blue, orange, red, pink, tan, green and cyan represent 1-H, 1-CH<sub>3</sub>, 1-OH, 1-OCH<sub>3</sub>, 1-NH<sub>2</sub>, 1-F, 1-CN and 1-NO<sub>2</sub>, respectively.)

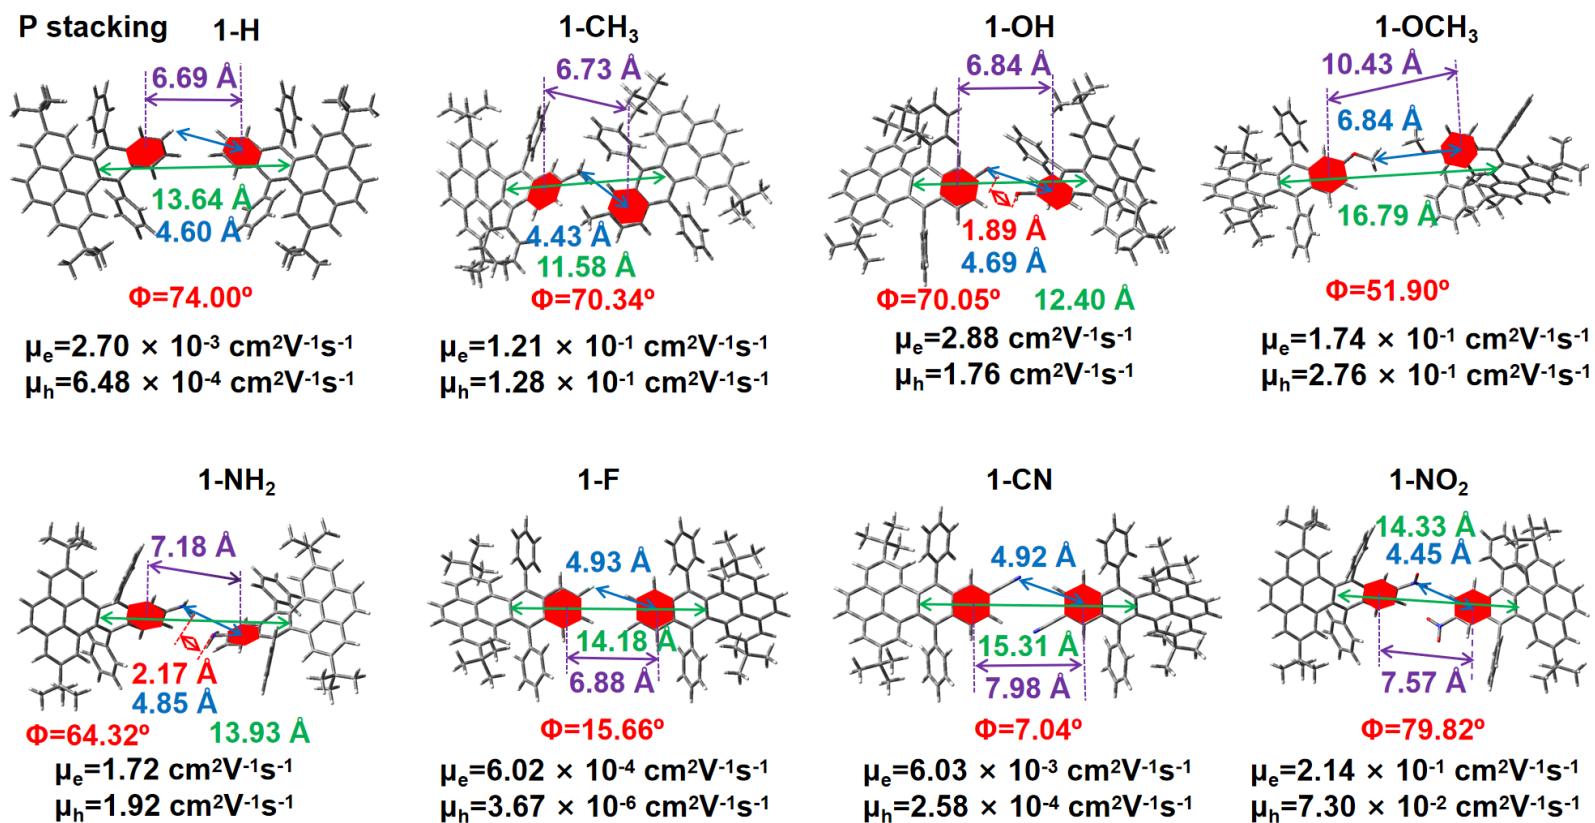

**Figure S2.** Intermolecular electron and hole mobilities and critical geometrical parameters of 1-H and its derivatives along P stacking mode, where  $\Phi$  is the twisted angle of two benzene rings.

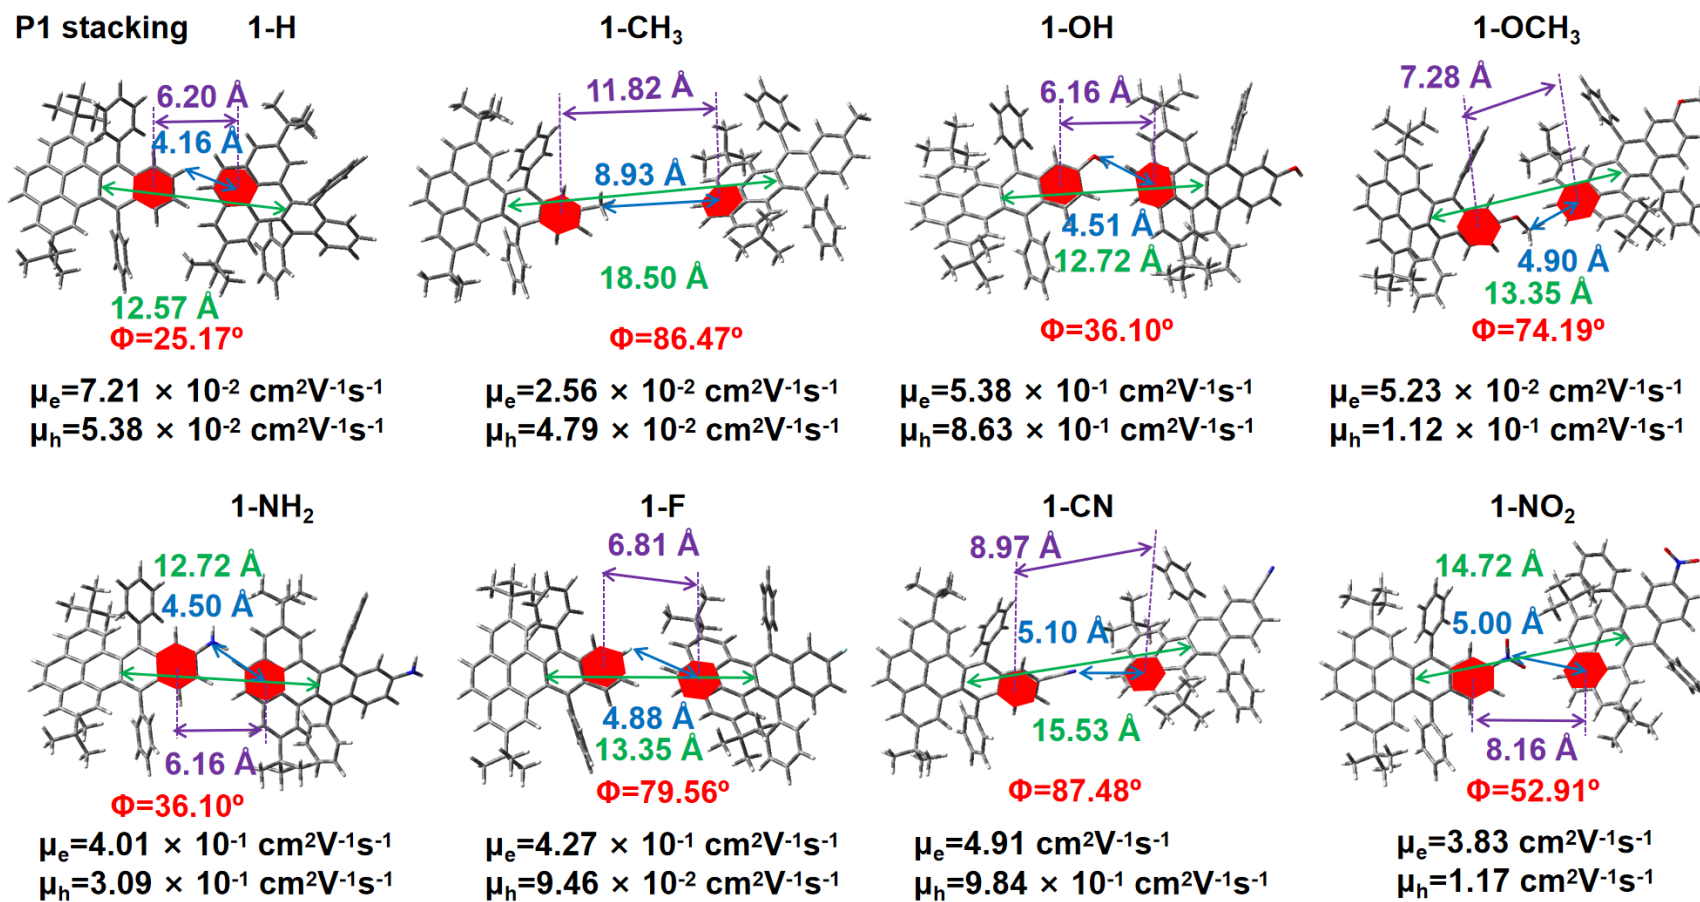

**Figure S3.** Intermolecular electron and hole mobilities and critical geometrical parameters of 1-H and its derivatives in P1 stacking mode, where  $\Phi$  is the twisted angle of two benzene rings.

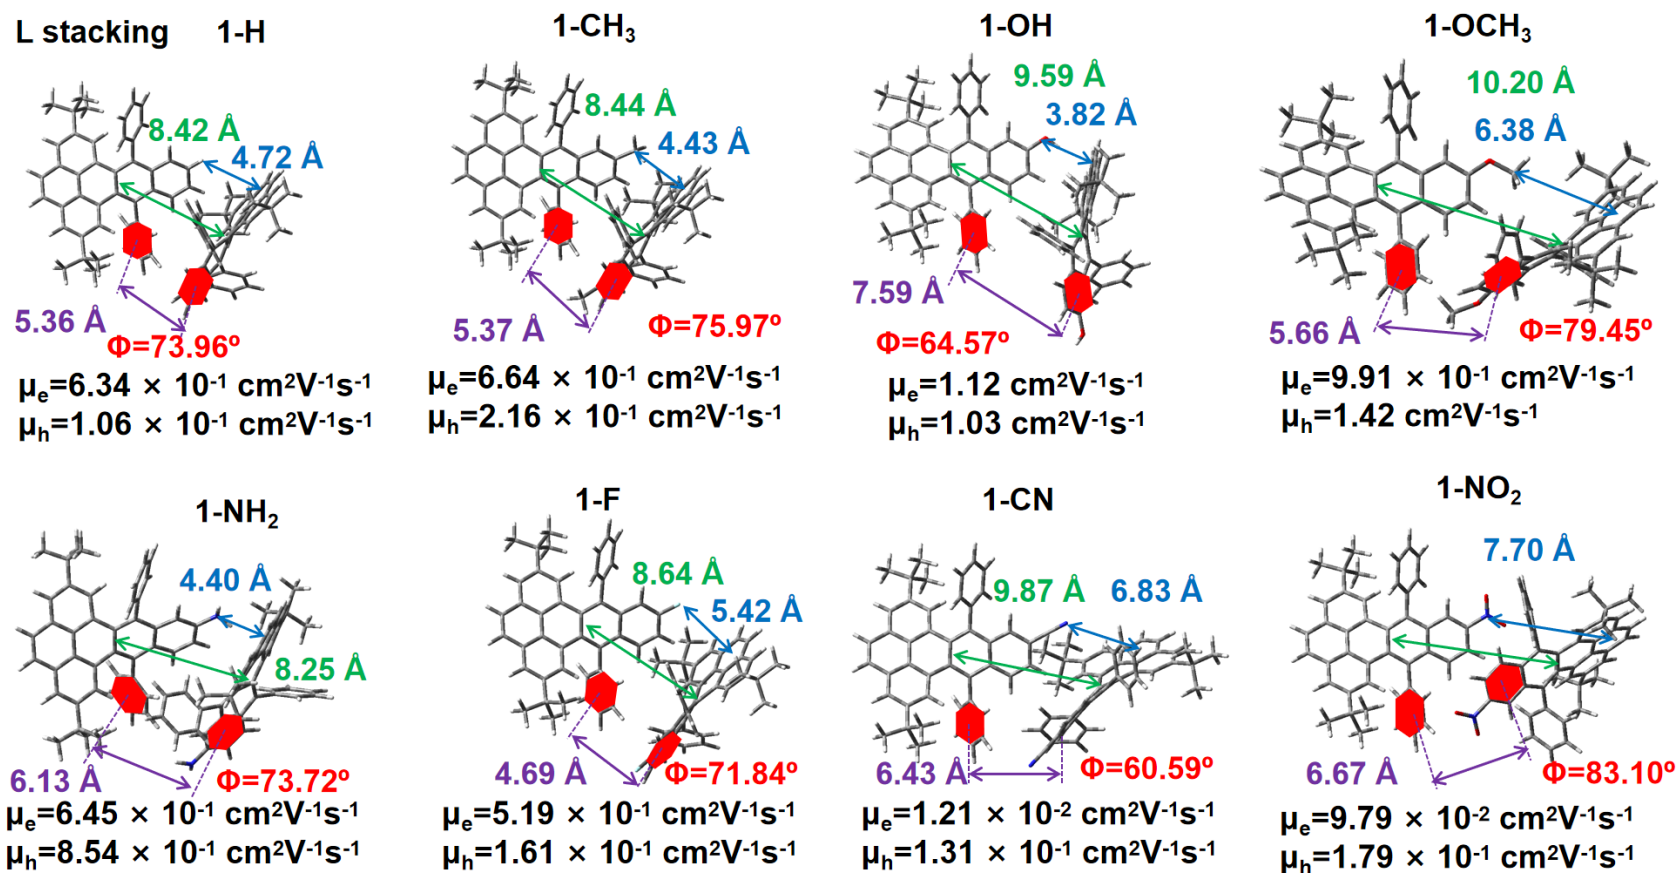

**Figure S4.** Intermolecular electron and hole mobilities and critical geometrical parameters of 1-H and its derivatives in L stacking mode, where  $\Phi$  is the twisted angle of two benzene rings.

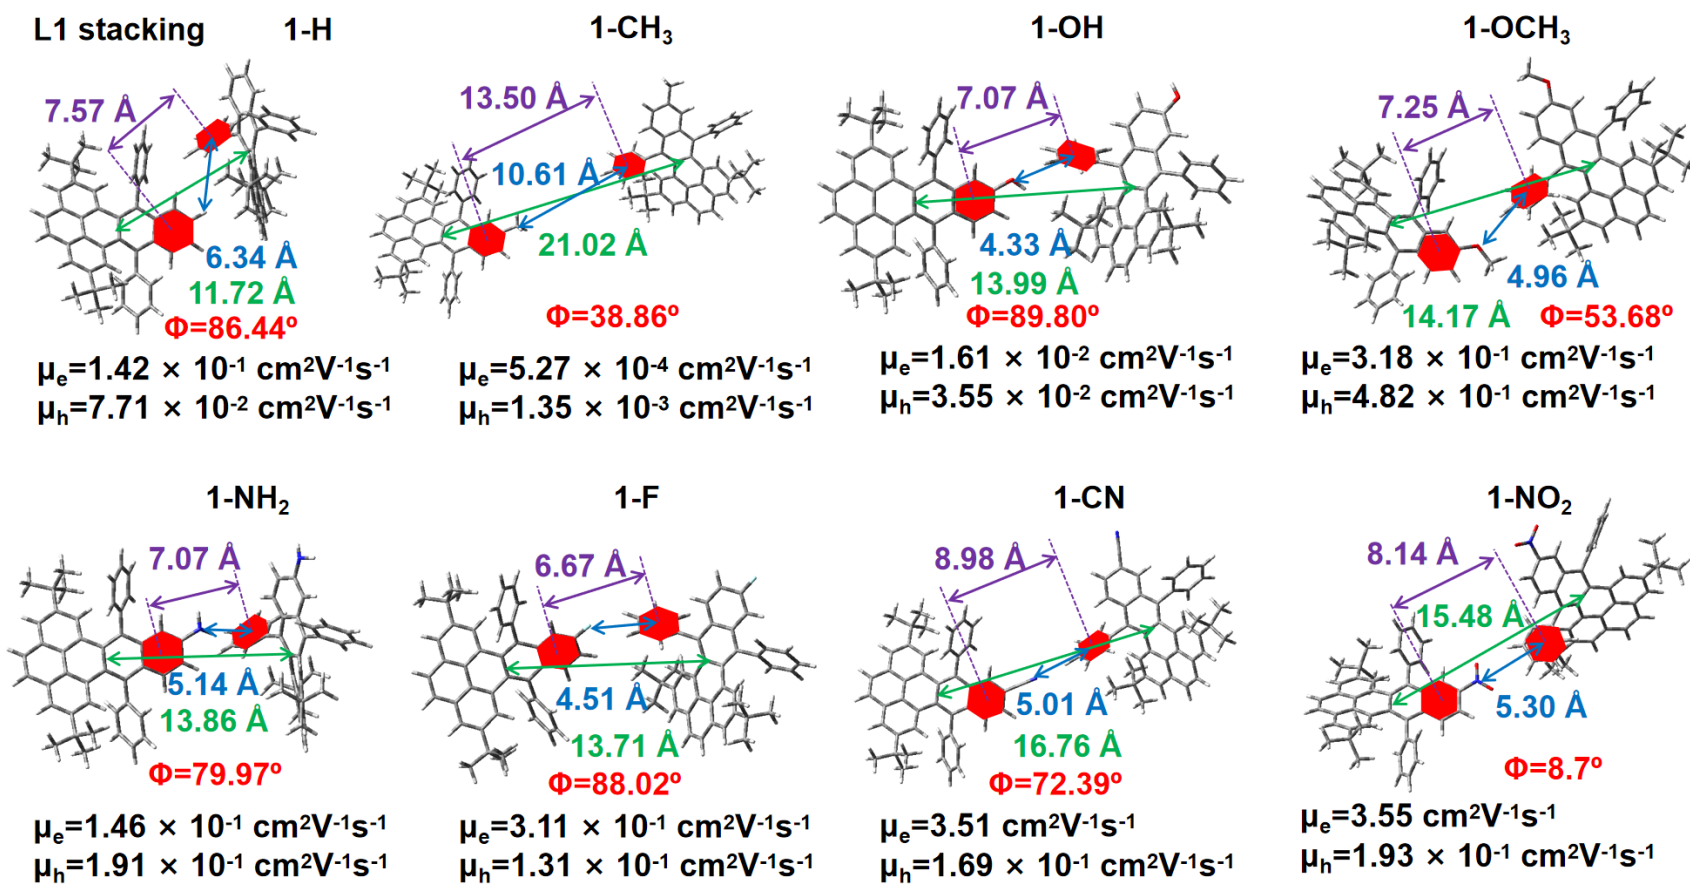

**Figure S5.** Intermolecular electron and hole mobilities and critical geometrical parameters of 1-H and its derivatives in L1 stacking mode, where  $\Phi$  is the twisted angle of benzene rings.

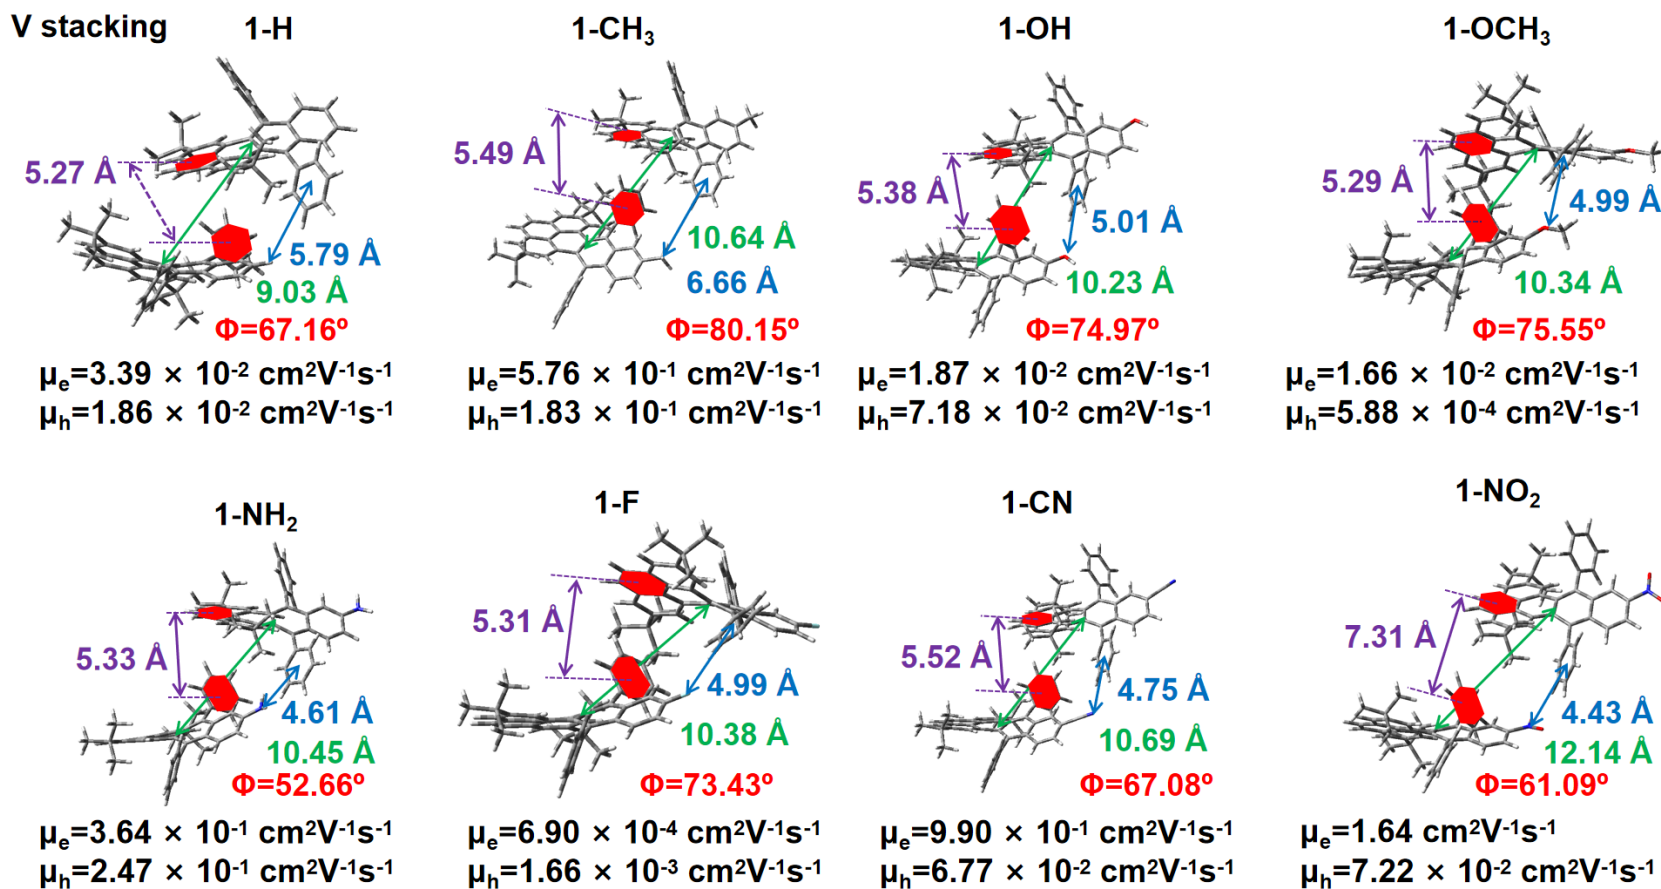

**Figure S6.** Intermolecular electron and hole mobilities and critical geometrical parameters of 1-H and its derivatives in V stacking mode, where  $\Phi$  is the twisted angle of two benzene rings.

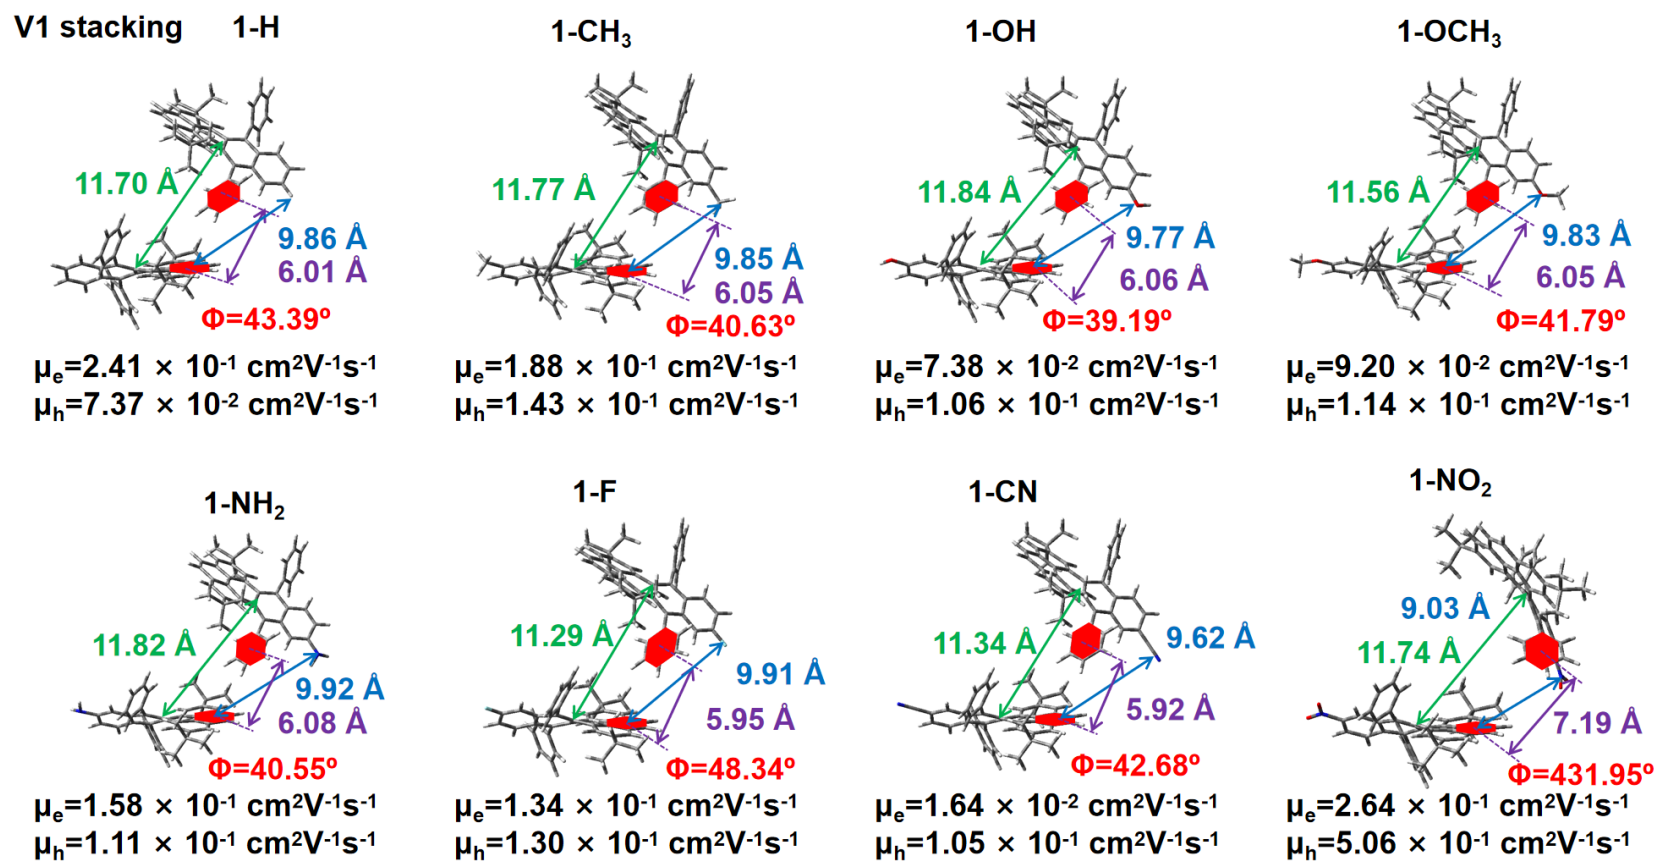

**Figure S7.** Intermolecular electron and hole mobilities and critical geometrical parameters of 1-H and its derivatives in V1 stacking mode, where  $\Phi$  is the twisted angle of two benzene rings.

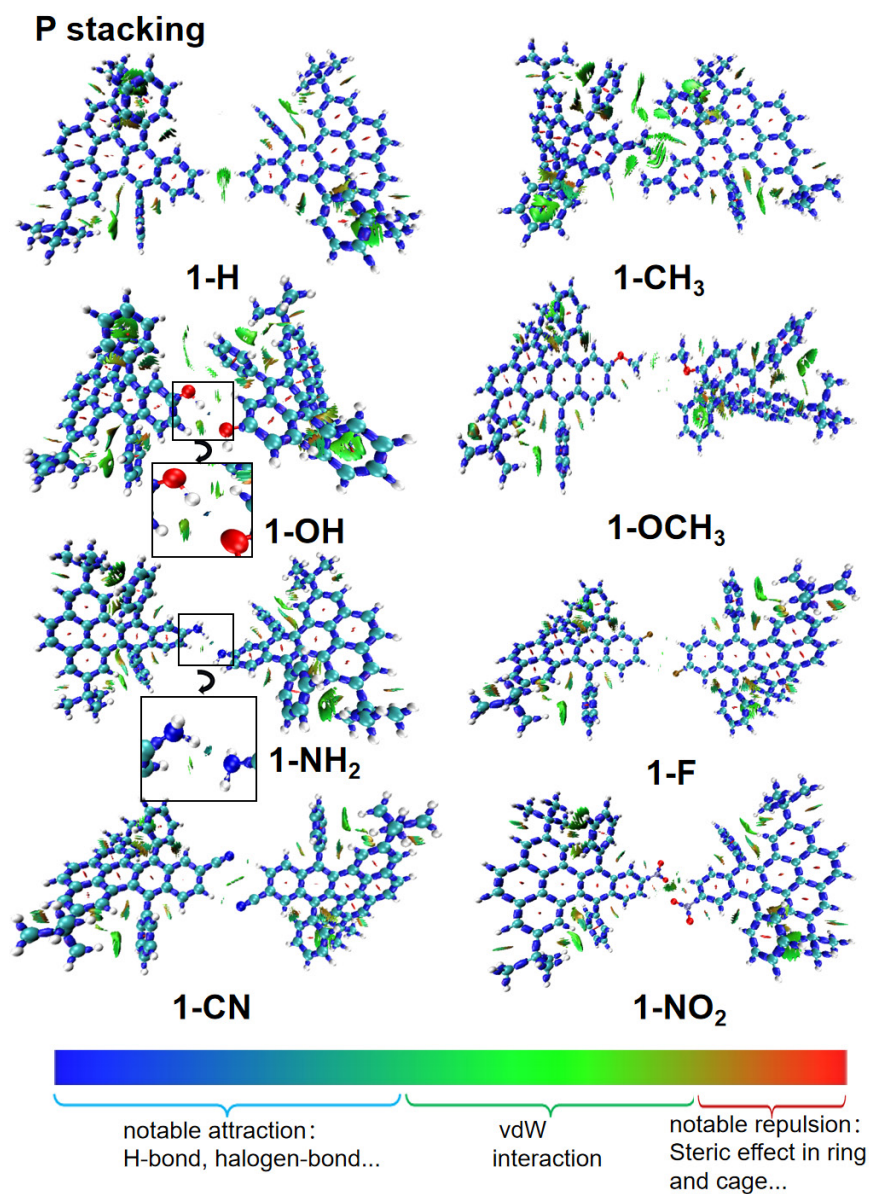

**Figure S8.** Interaction region indicator (IRI) of chemical bonds and weak interactions for the 1-H and its derivatives dimers along P stacking, which were computed by Gaussian 09 at B3LYP-GD2/6-311G\*\*//B3LYP/6-311G\*\* level and plotted by Multiwfn and VMD programs. The IRI isovalue is 1.



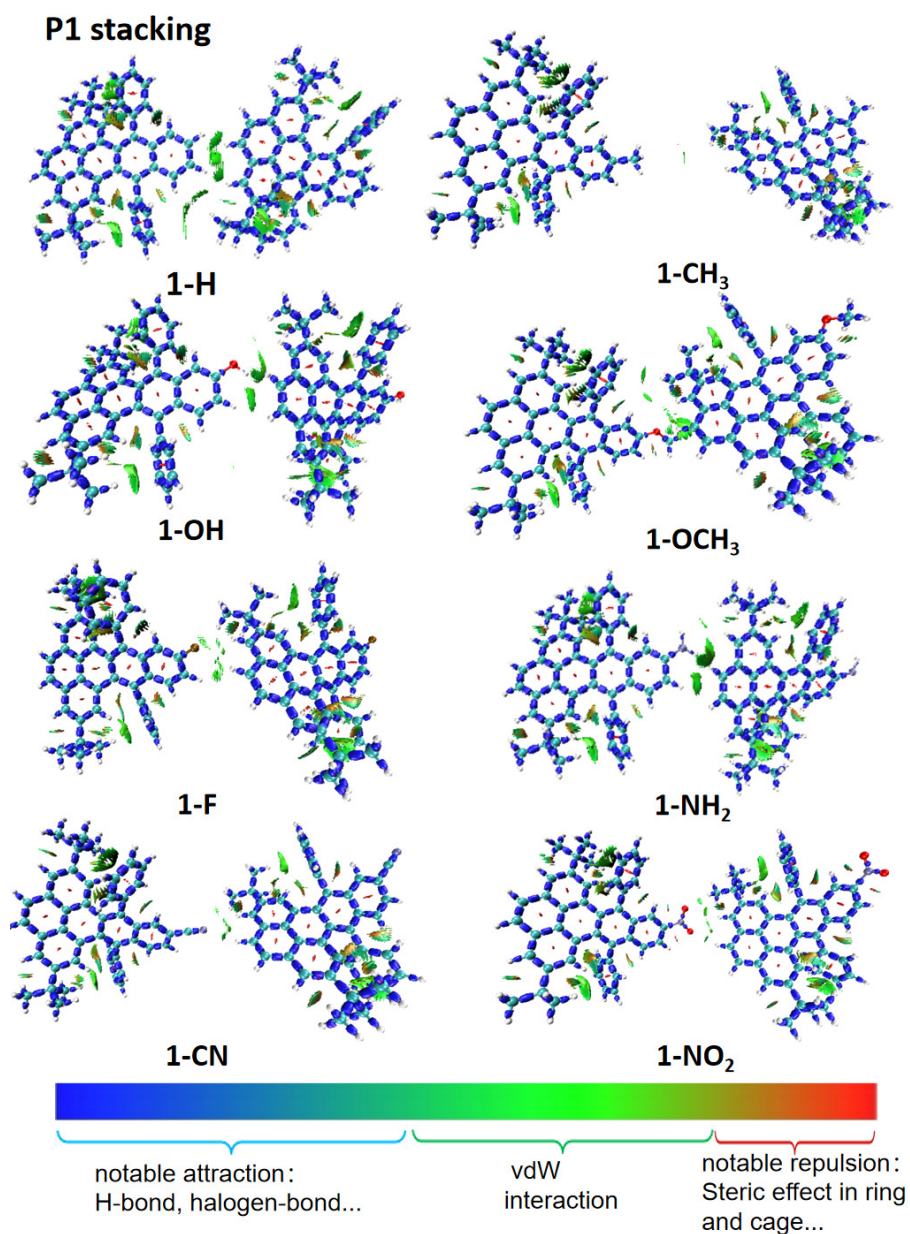

**Figure S9.** Interaction region indicator (IRI) of chemical bonds and weak interactions for the 1-H and its derivatives dimers along P1 stacking, which were computed by Gaussian 09 at B3LYP-GD2/6-311G\*\*//B3LYP/6-311G\*\* level and plotted by Multiwfn and VMD programs. The IRI isovalue is 1.

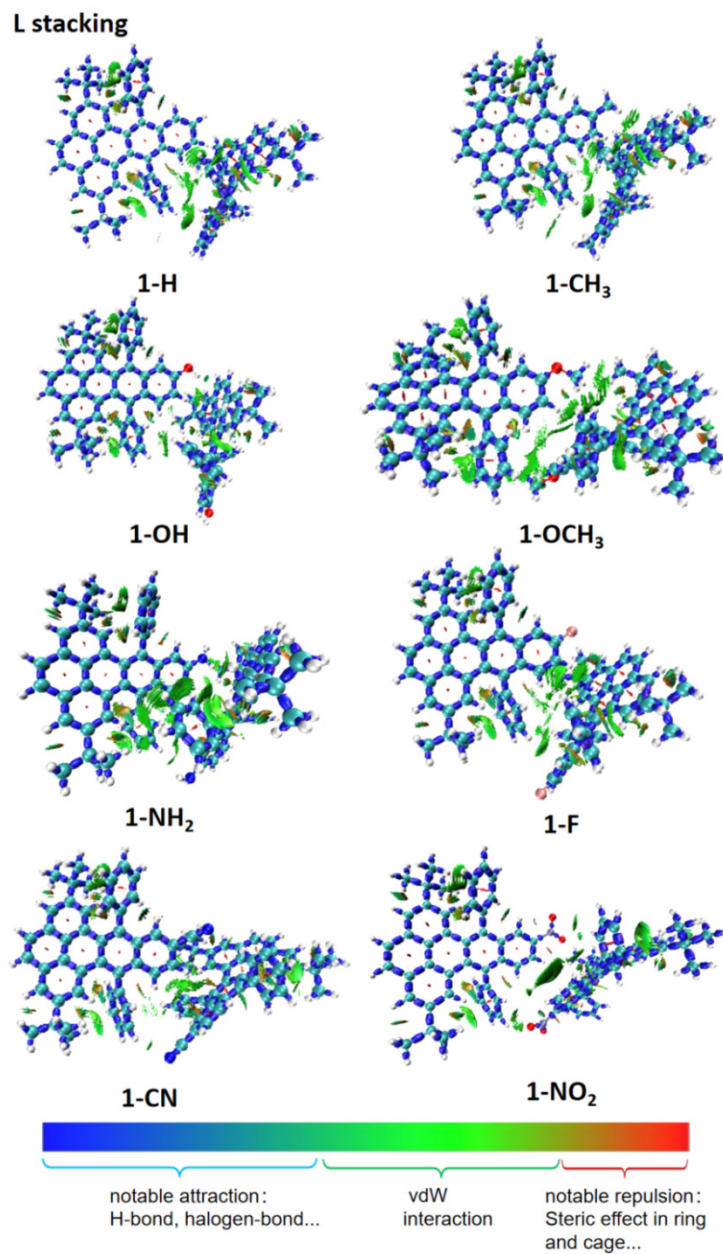

**Figure S10.** Interaction region indicator (IRI) of chemical bonds and weak interactions for the 1-H and its derivatives dimers along L stacking, which were computed by Gaussian 09 at B3LYP-GD2/6-311G\*\*//B3LYP/6-311G\*\* level and plotted by Multiwfn and VMD programs. The IRI isovalue is 1.

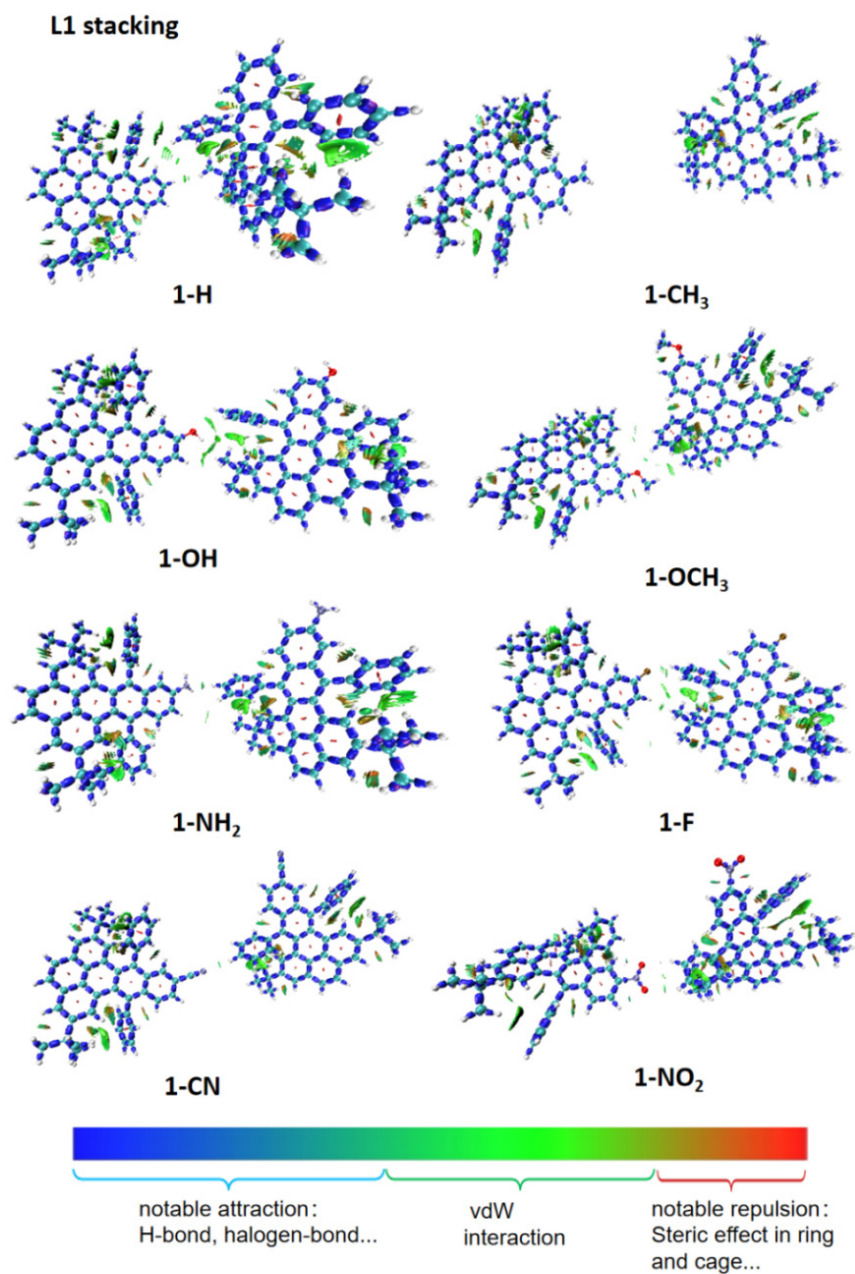

**Figure S11.** Interaction region indicator (IRI) of chemical bonds and weak interactions for the 1-H and its derivatives dimers along L1 stacking, which were computed by Gaussian 09 at B3LYP-GD2/6-311G\*\*//B3LYP/6-311G\*\* level and plotted by Multiwfn and VMD programs. The IRI isovalue is 1.

### V stacking

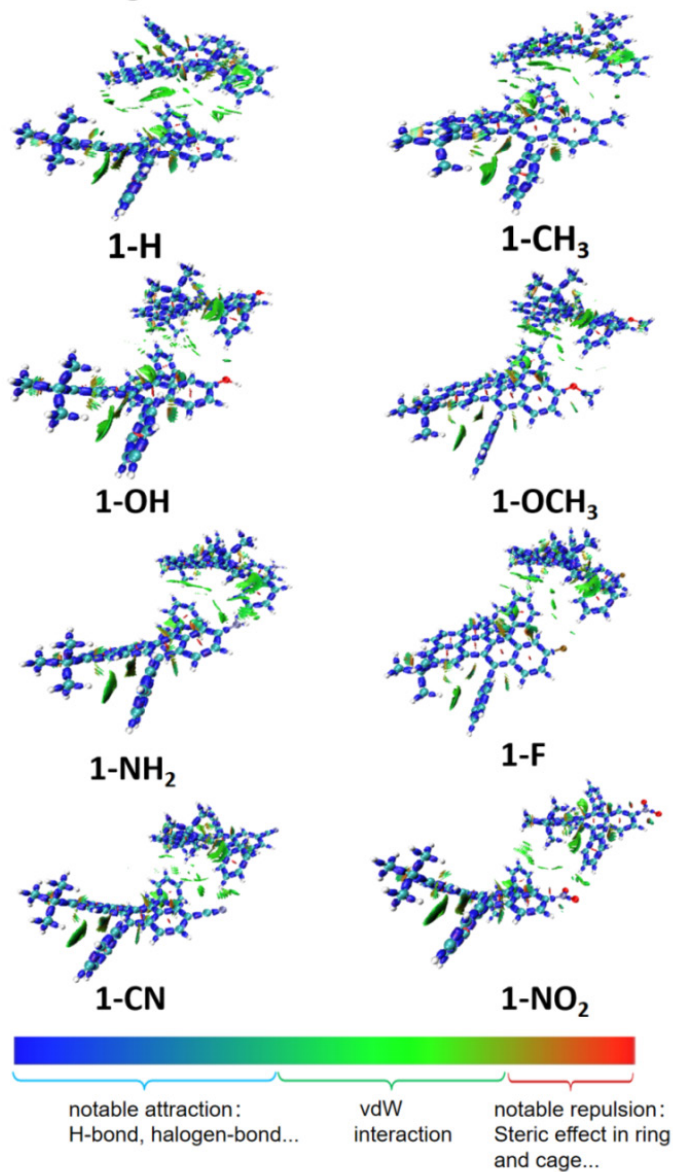

**Figure S12.** Interaction region indicator (IRI) of chemical bonds and weak interactions for the 1-H and its derivatives dimers along V stacking, which were computed by Gaussian 09 at B3LYP-GD2/6-311G\*\*//B3LYP/6-311G\*\* level and plotted by Multiwfn and VMD programs. The IRI isovalue is 1.

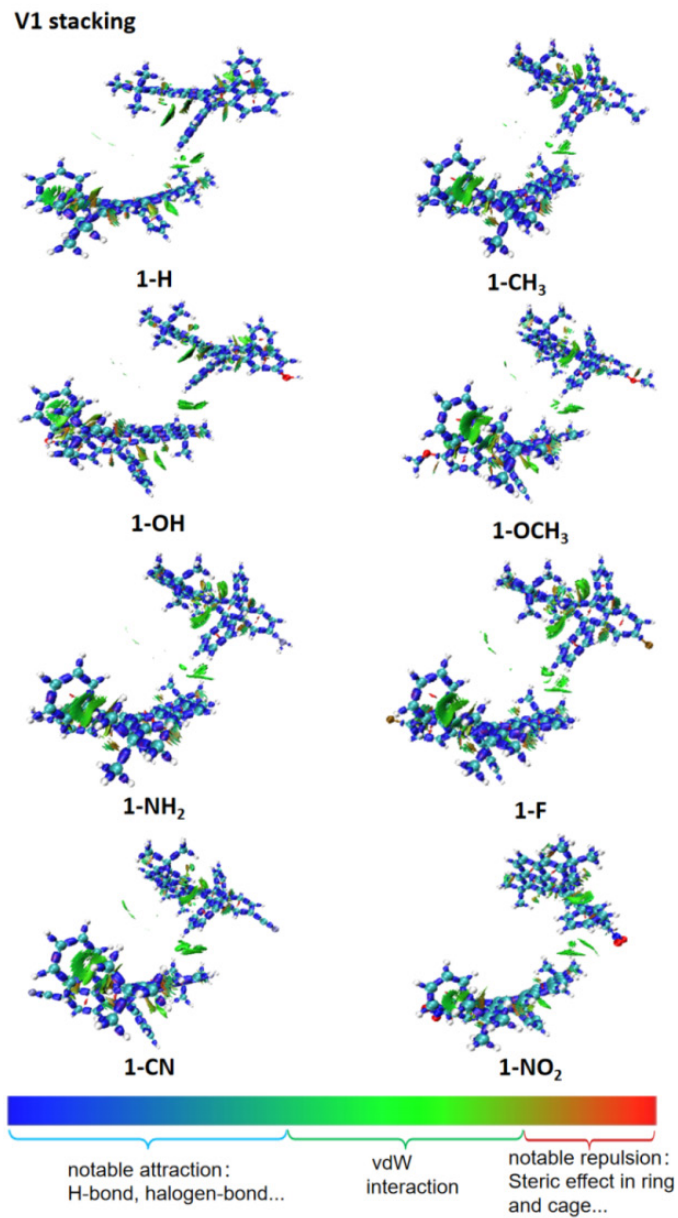

**Figure S13.** Interaction region indicator (IRI) of chemical bonds and weak interactions for the 1-H and its derivatives dimers along V1 stacking, which were computed by Gaussian 09 at B3LYP-GD2/6-311G\*\*//B3LYP/6-311G\*\* level and plotted by Multiwfn and VMD programs. The IRI isovalue is 1.

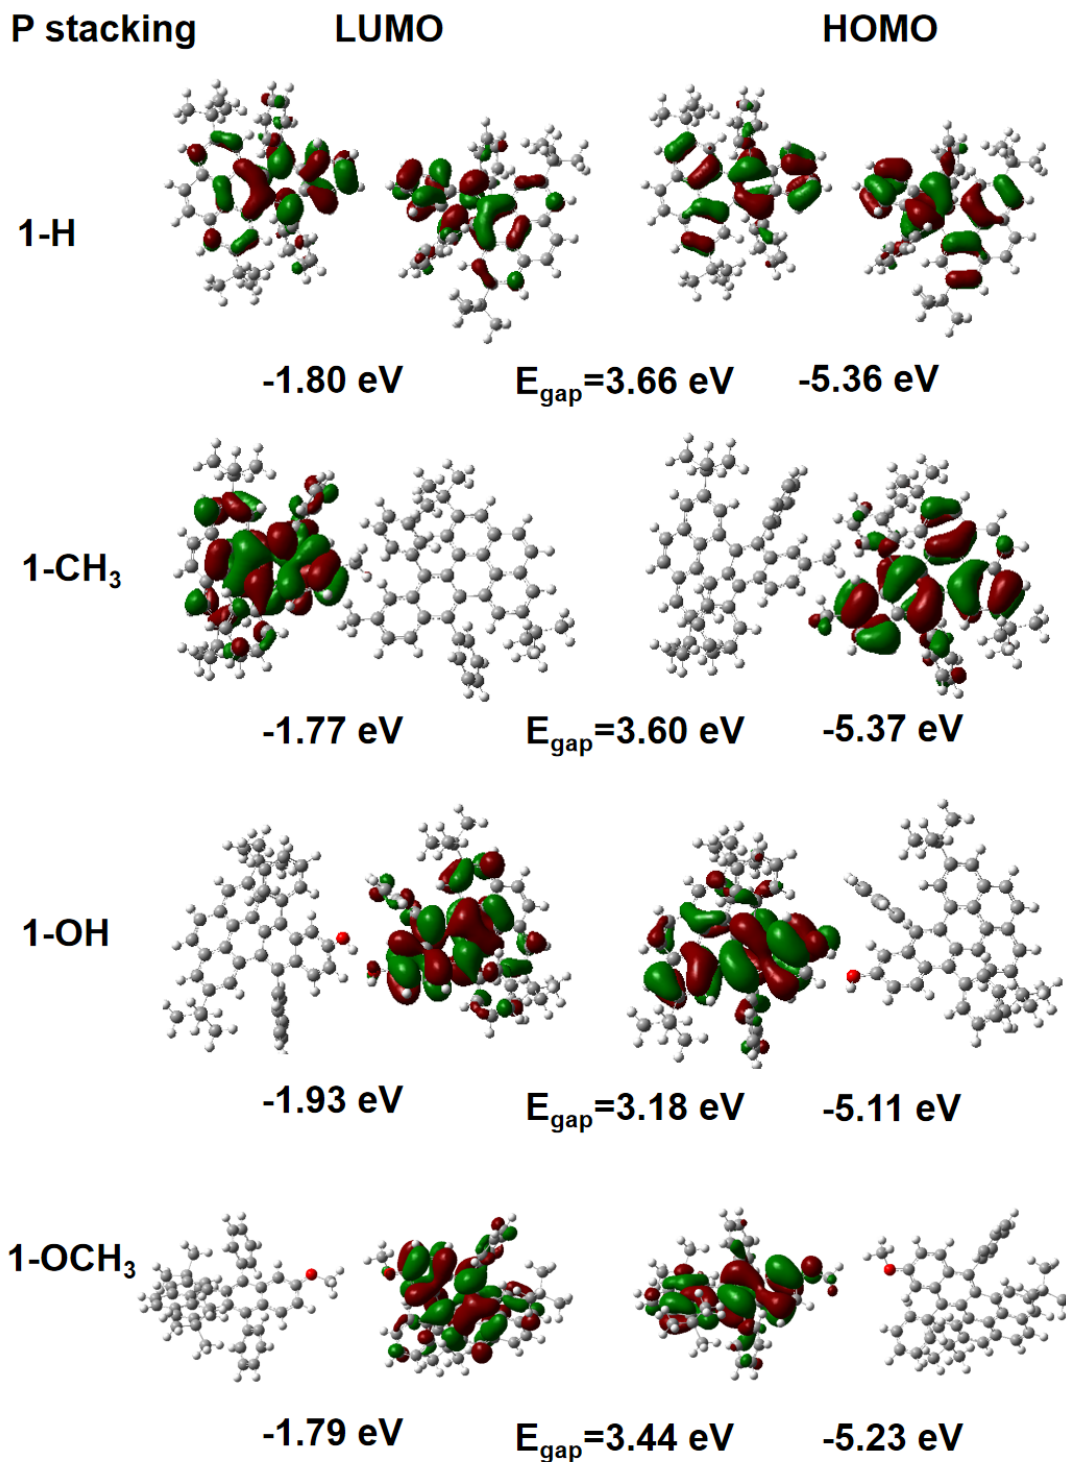

**Figure S14.** Energy levels of HOMOs and LUMOs at B3LYP/6-311G\*\* level for 1-H, 1-CH<sub>3</sub>, 1-OH and 1-OCH<sub>3</sub> dimers along P stacking direction.

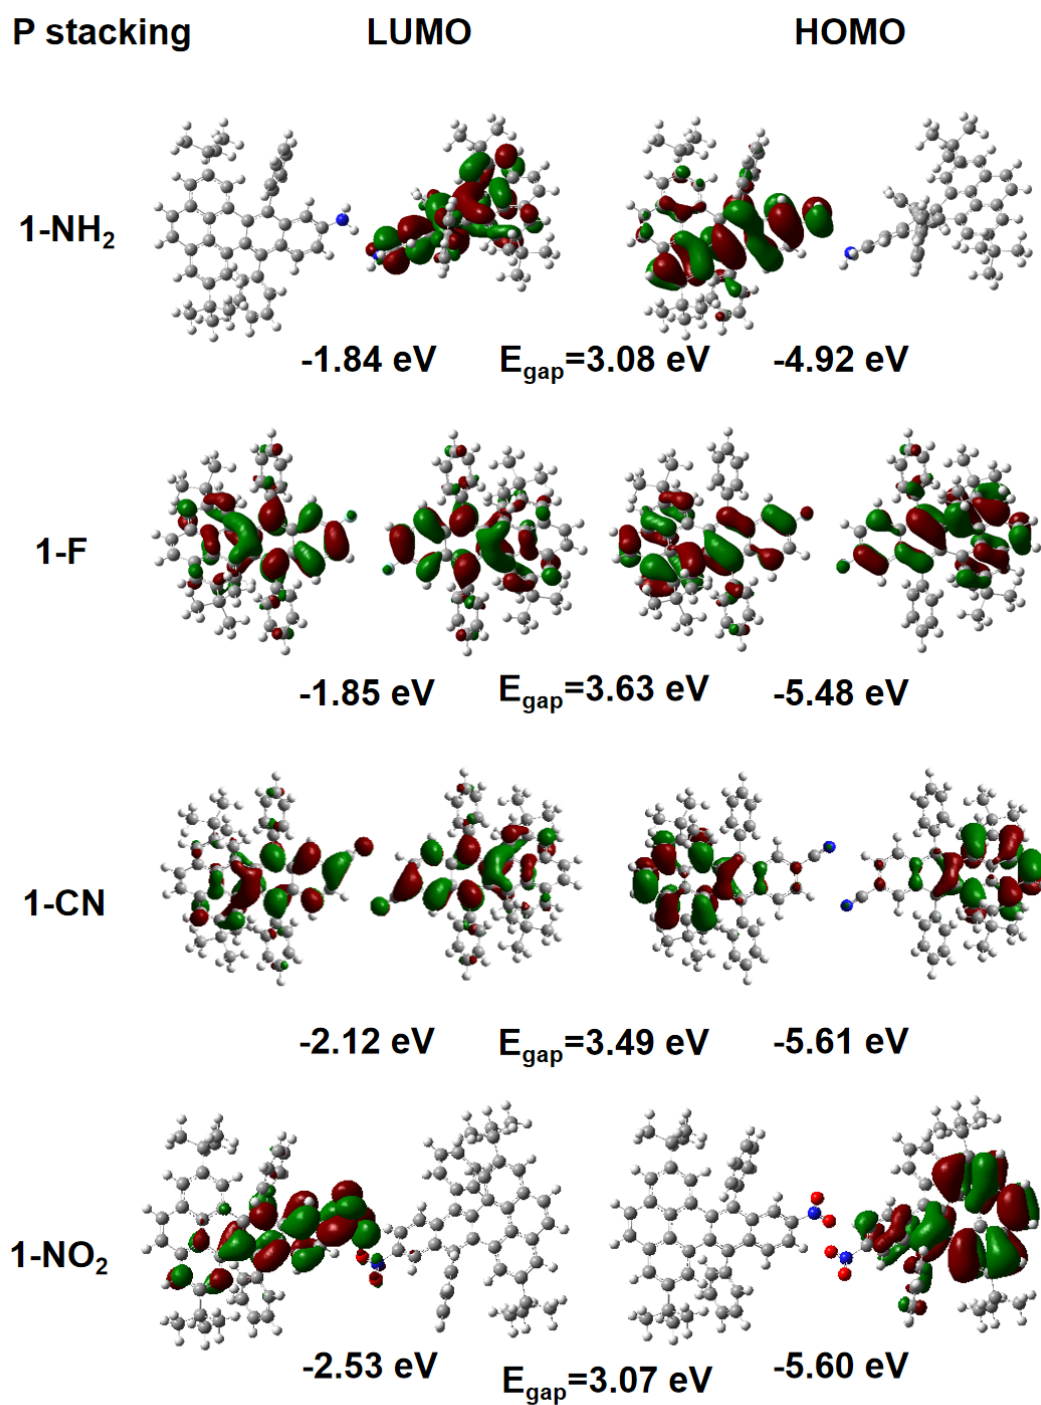

**Figure S15.** Energy levels of HOMOs and LUMOs at B3LYP/6-311G\*\* level for 1-NH<sub>2</sub>, 1-F, 1-CN and 1-NO<sub>2</sub> dimers along P stacking direction.

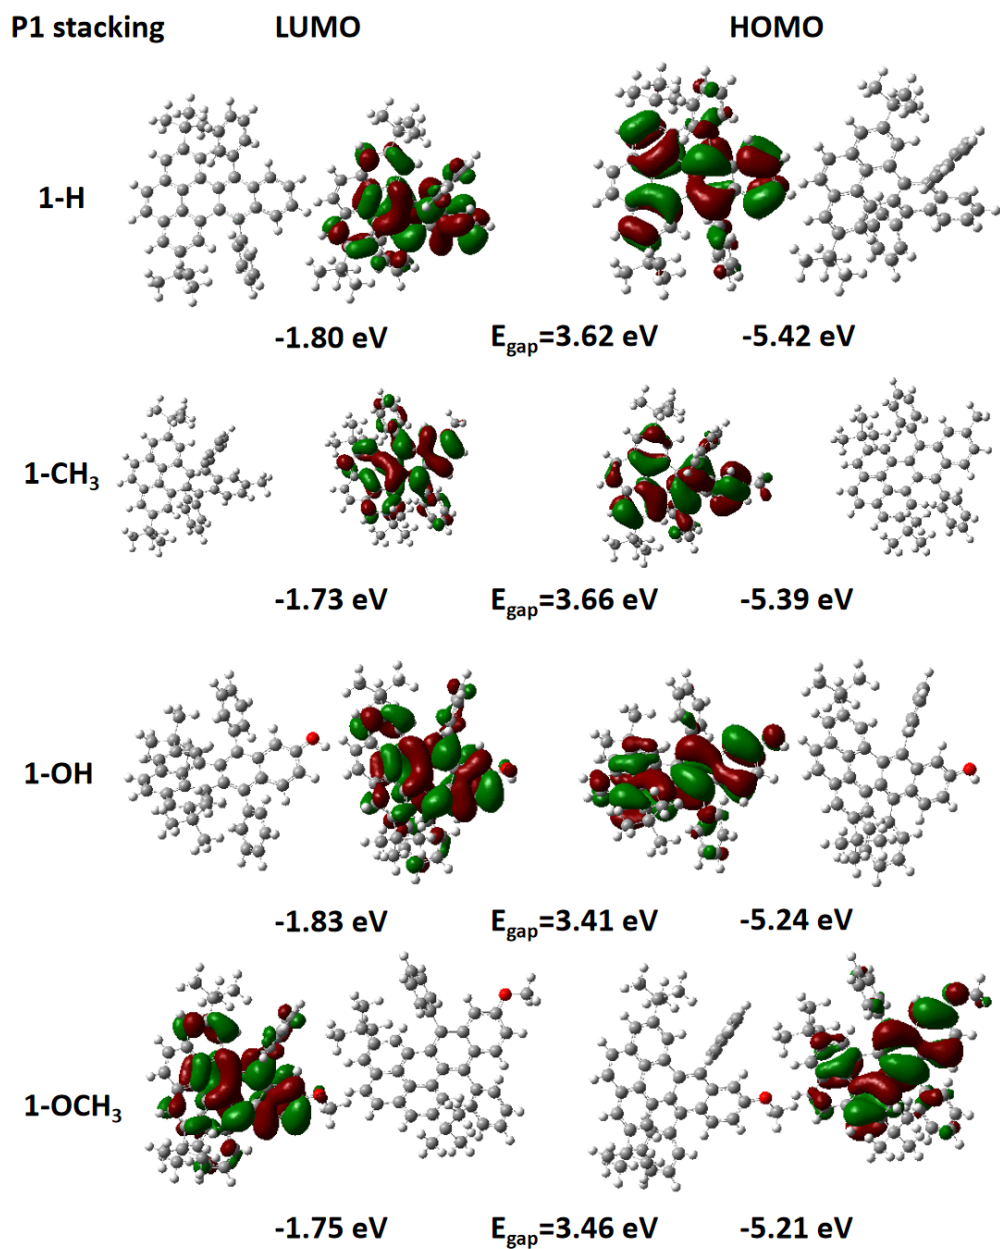

**Figure S16.** Energy levels of HOMOs and LUMOs at B3LYP/6-311G\*\* level for 1-H, 1-CH<sub>3</sub>, 1-OH and 1-OCH<sub>3</sub> dimers along P1 stacking direction.



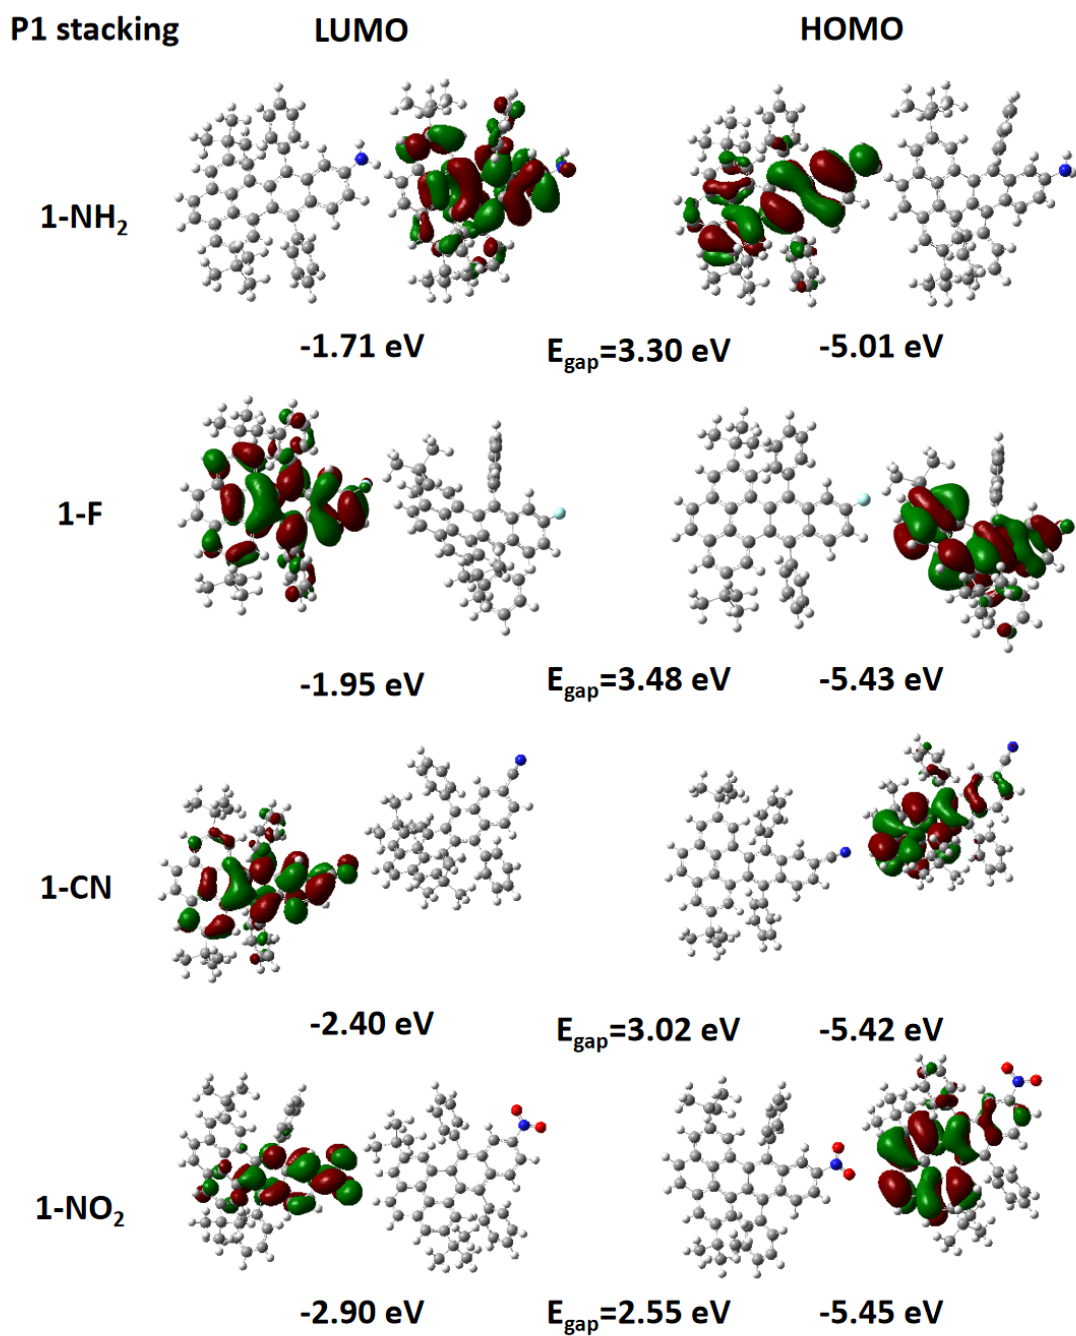

**Figure S17.** Energy levels of HOMOs and LUMOs at B3LYP/6-311G\*\* level for 1-NH<sub>2</sub>, 1-F, 1-CN and 1-NO<sub>2</sub> dimers along P1 stacking direction.

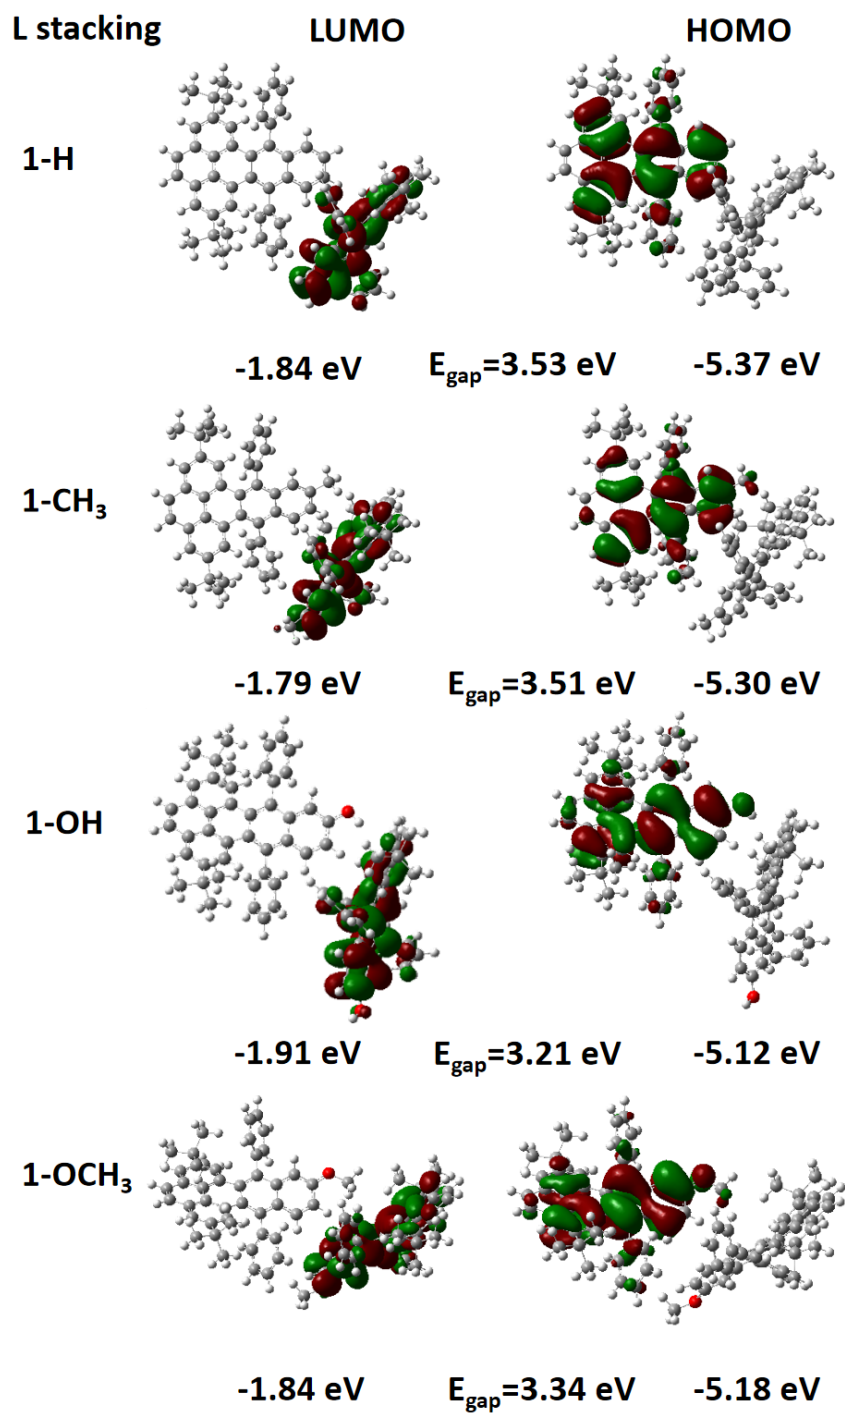

**Figure S18.** Energy levels of HOMOs and LUMOs at B3LYP/6-311G\*\* level for 1-H, 1-CH<sub>3</sub>, 1-OH and 1-OCH<sub>3</sub> dimers along L stacking direction.

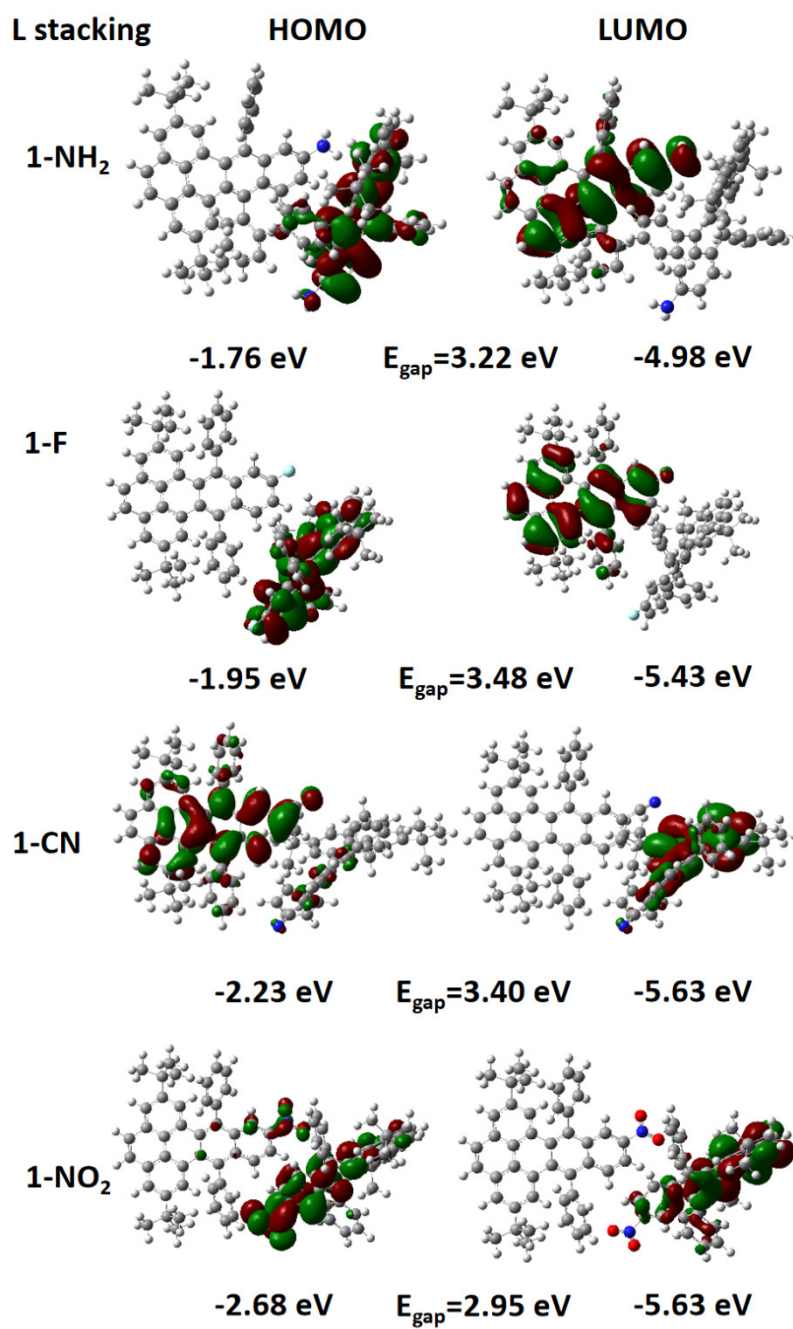

**Figure S19.** Energy levels of HOMOs and LUMOs at B3LYP/6-311G\*\* level for 1-NH<sub>2</sub>, 1-F, 1-CN and 1-NO<sub>2</sub> dimers along L stacking direction.

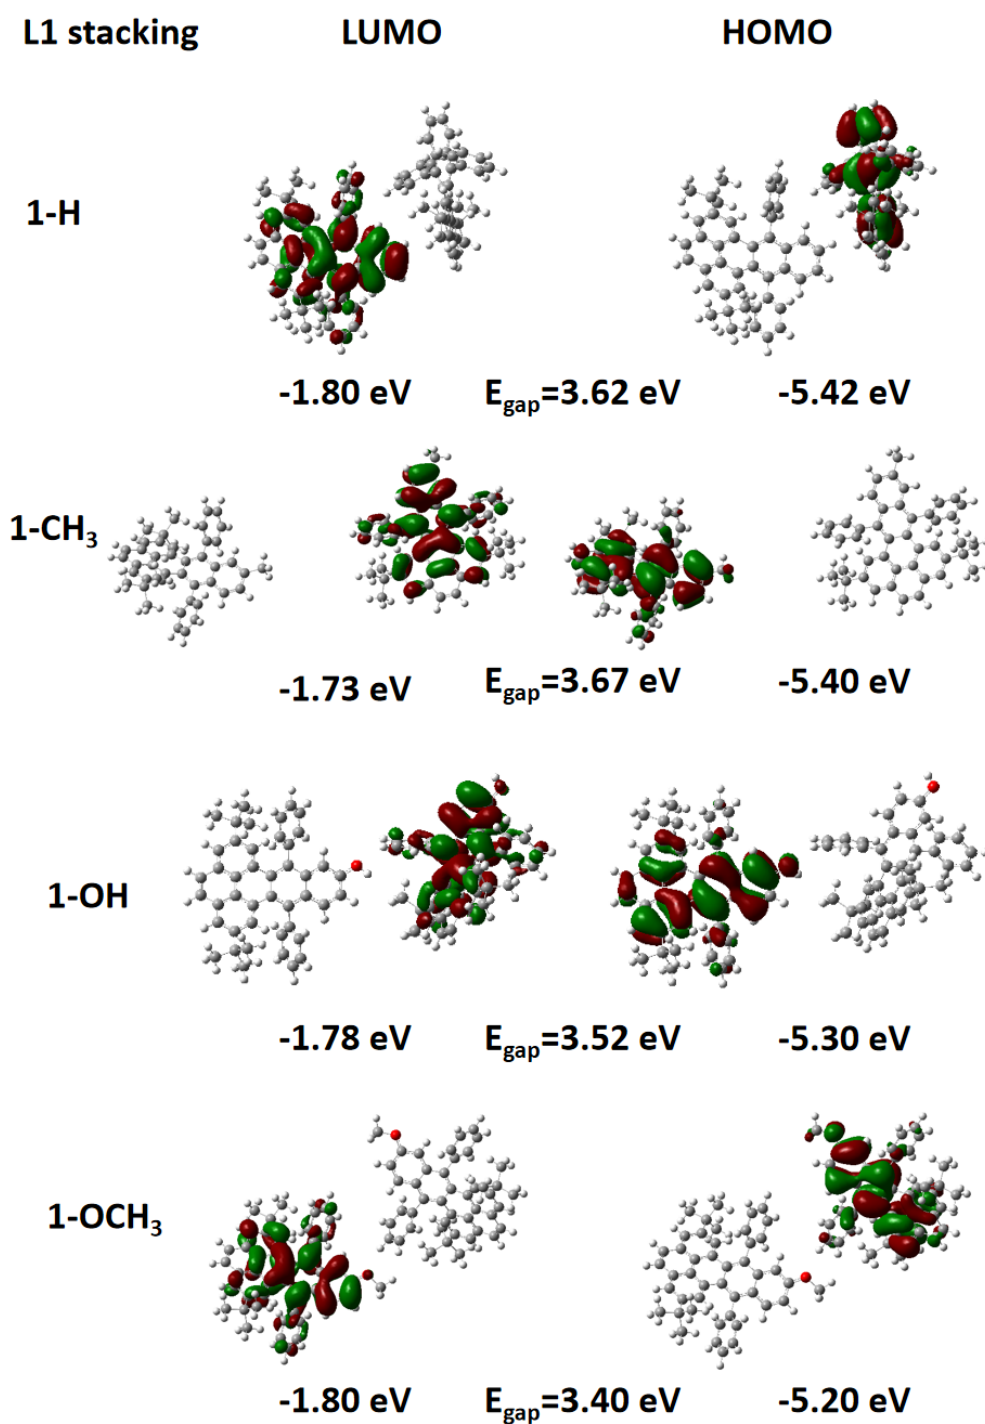

**Figure S20.** Energy levels of HOMOs and LUMOs at B3LYP/6-311G\*\* level for 1-H, 1-CH<sub>3</sub>, 1-OH and 1-OCH<sub>3</sub> dimers along L1 stacking direction.

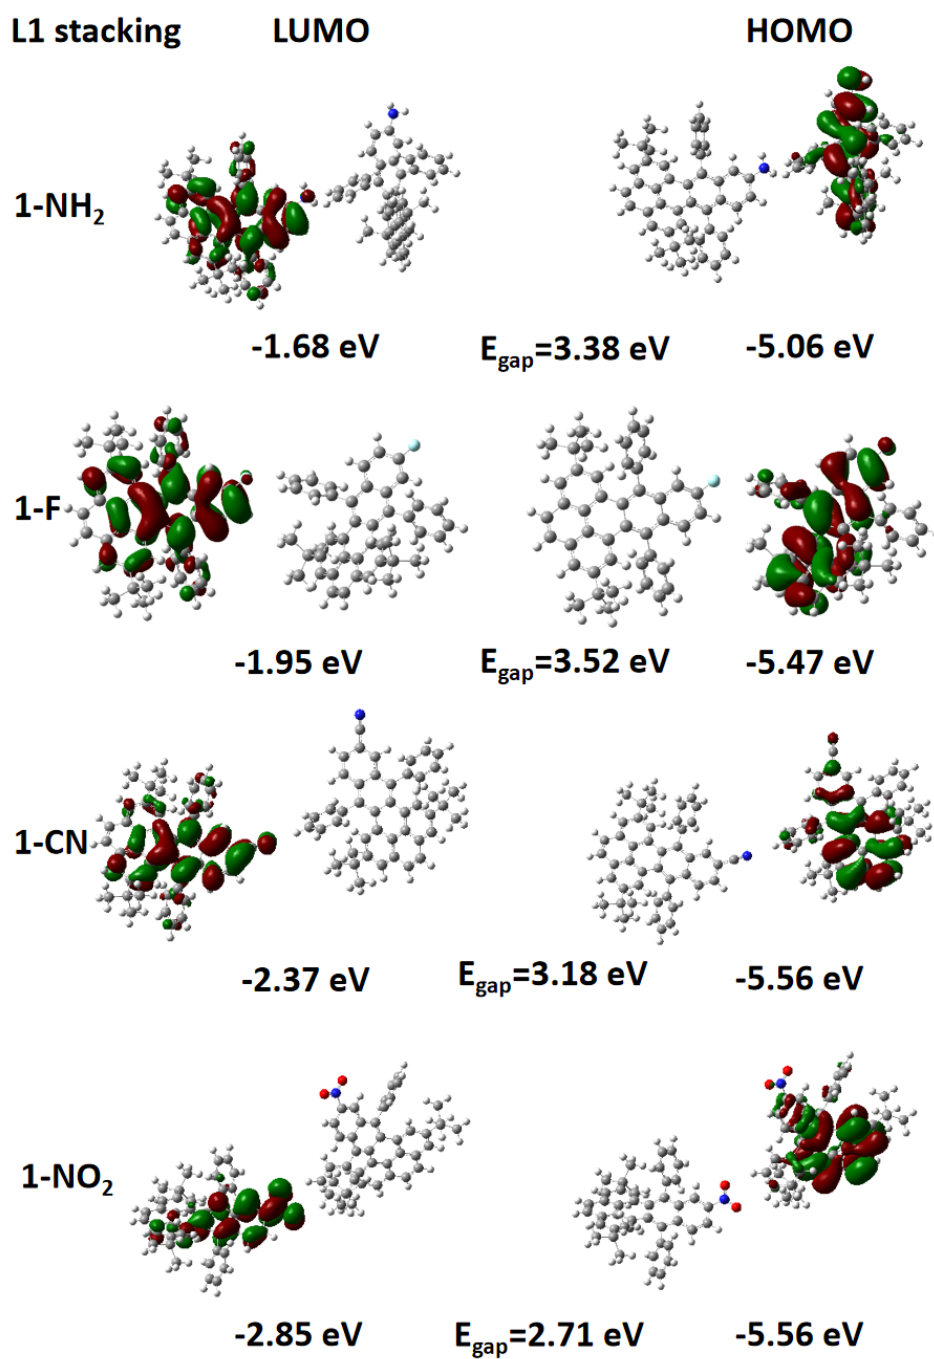

**Figure S21.** Energy levels of HOMOs and LUMOs at B3LYP/6-311G\*\* level for 1-NH<sub>2</sub>, 1-F, 1-CN and 1-NO<sub>2</sub> dimers along L1 stacking direction.

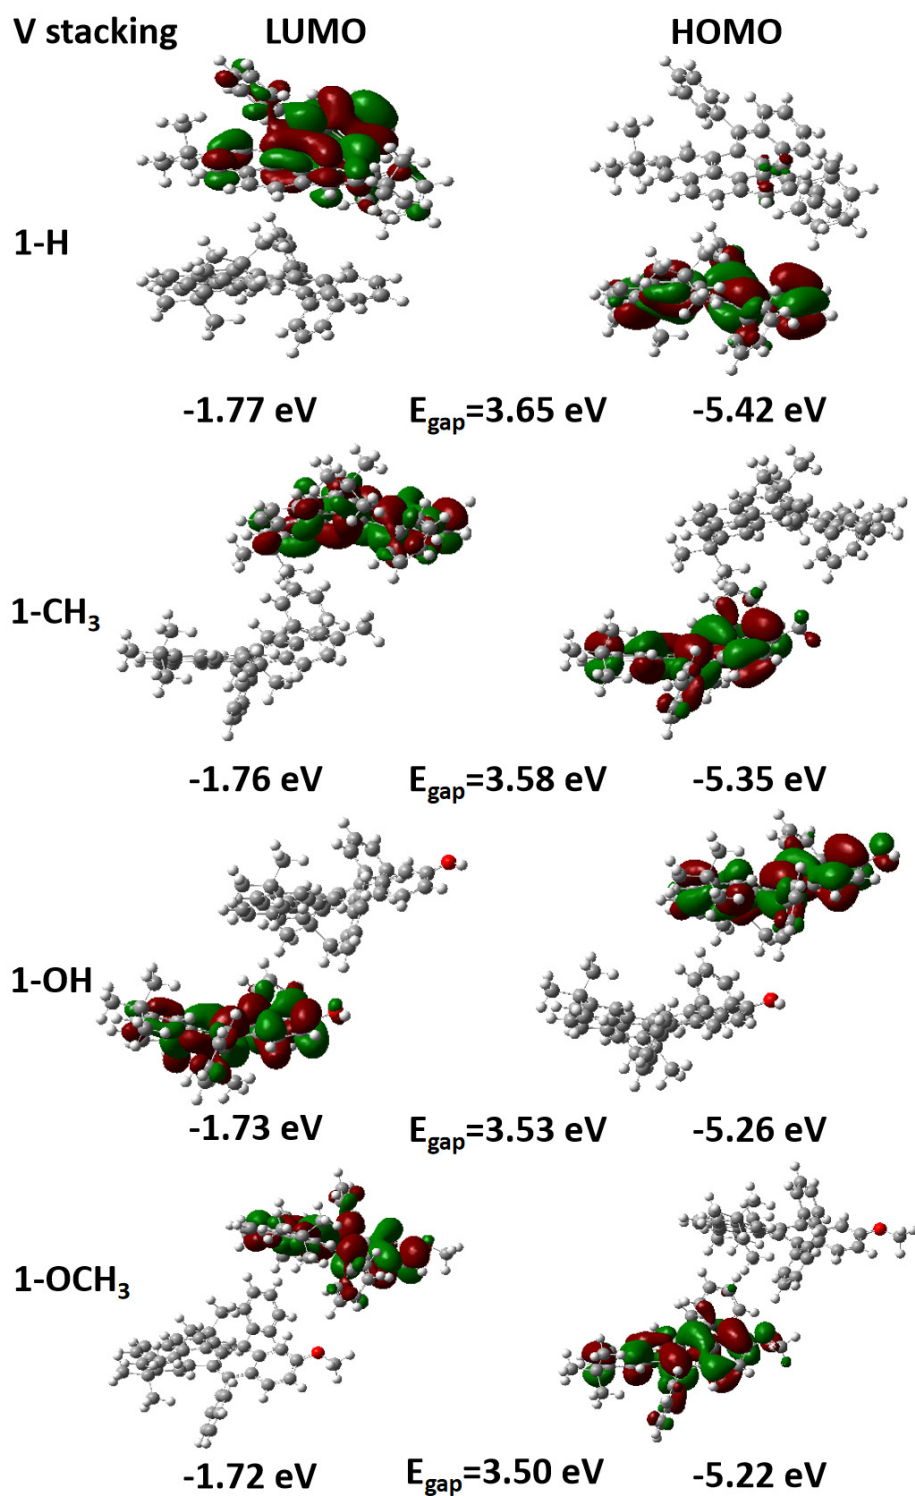

**Figure S22.** Energy levels of HOMOs and LUMOs at B3LYP/6-311G\*\* level for 1-H, 1-CH<sub>3</sub>, 1-OH and 1-OCH<sub>3</sub> dimers along V stacking direction.

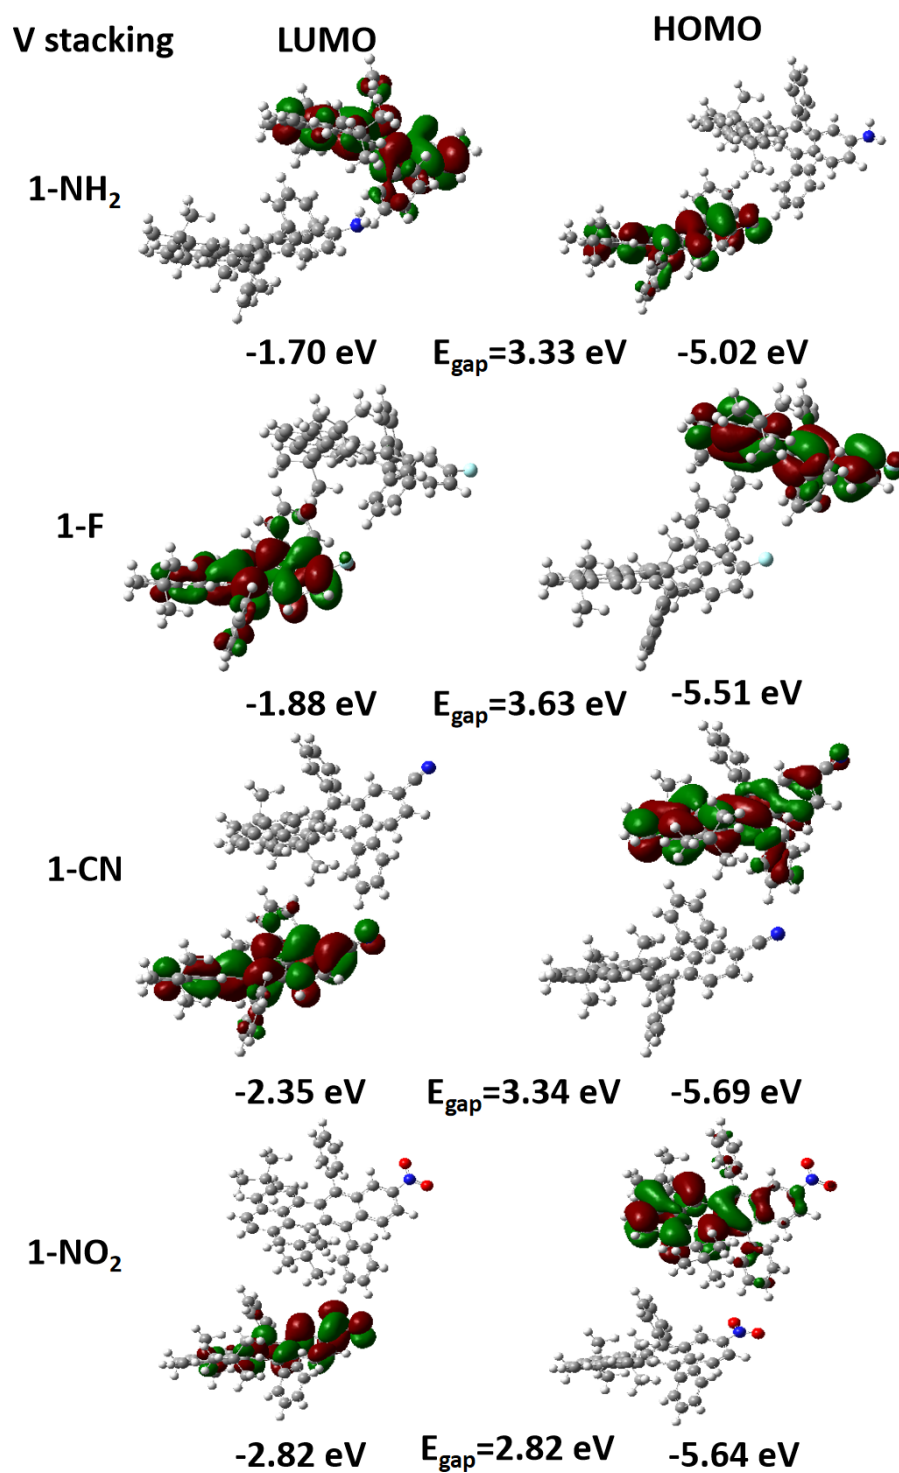

**Figure S23.** Energy levels of HOMOs and LUMOs at B3LYP/6-311G\*\* level for 1-NH<sub>2</sub>, 1-F, 1-CN and 1-NO<sub>2</sub> dimers along V stacking direction.

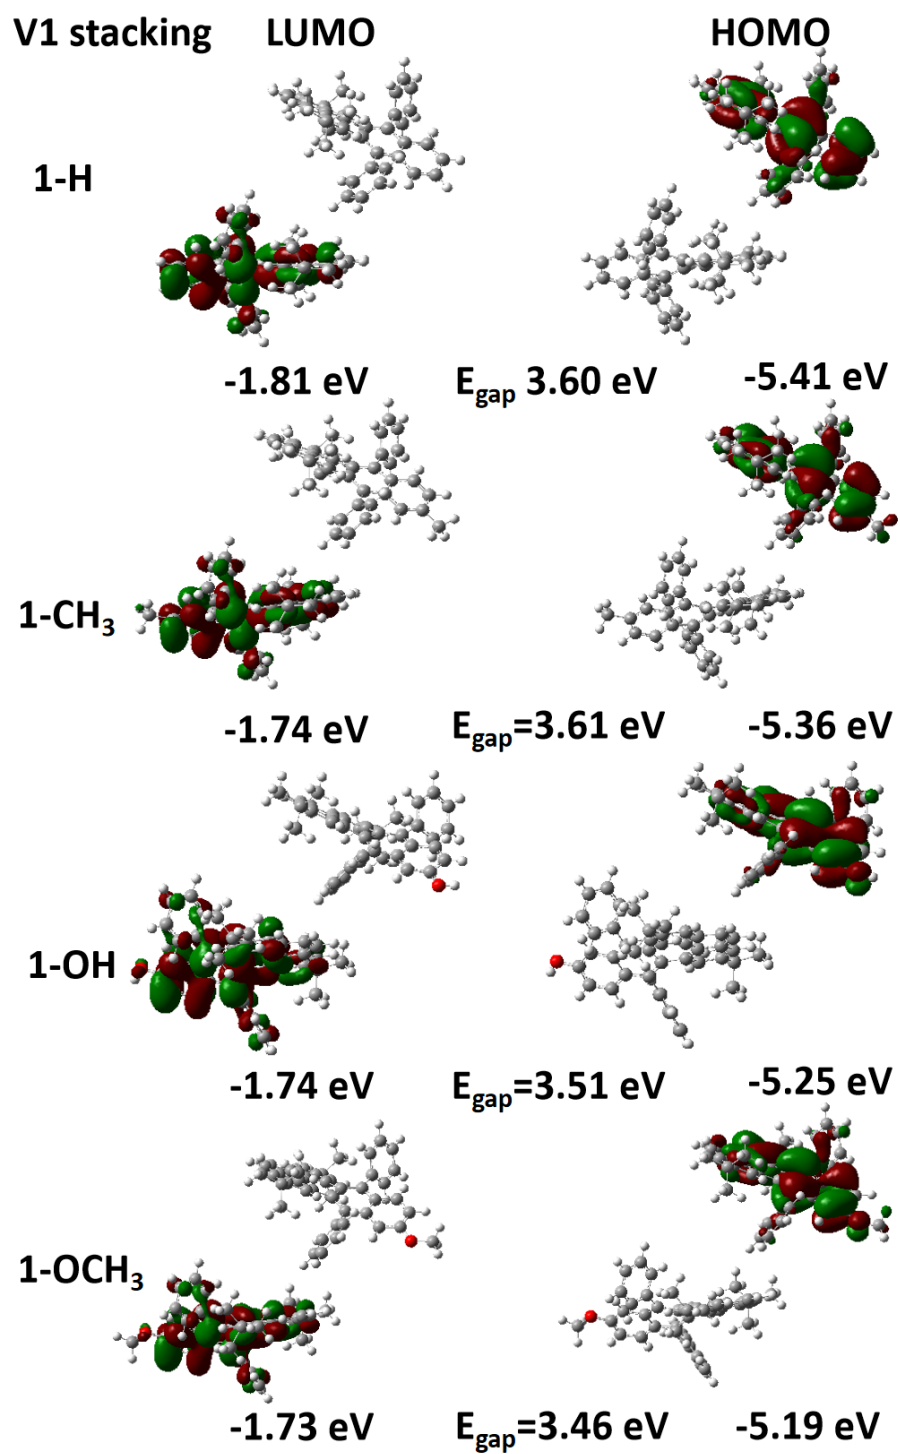

**Figure S24.** Energy levels of HOMOs and LUMOs at B3LYP/6-311G\*\* level for 1-H, 1-CH<sub>3</sub>, 1-OH and 1-OCH<sub>3</sub> dimers along V1 stacking direction.



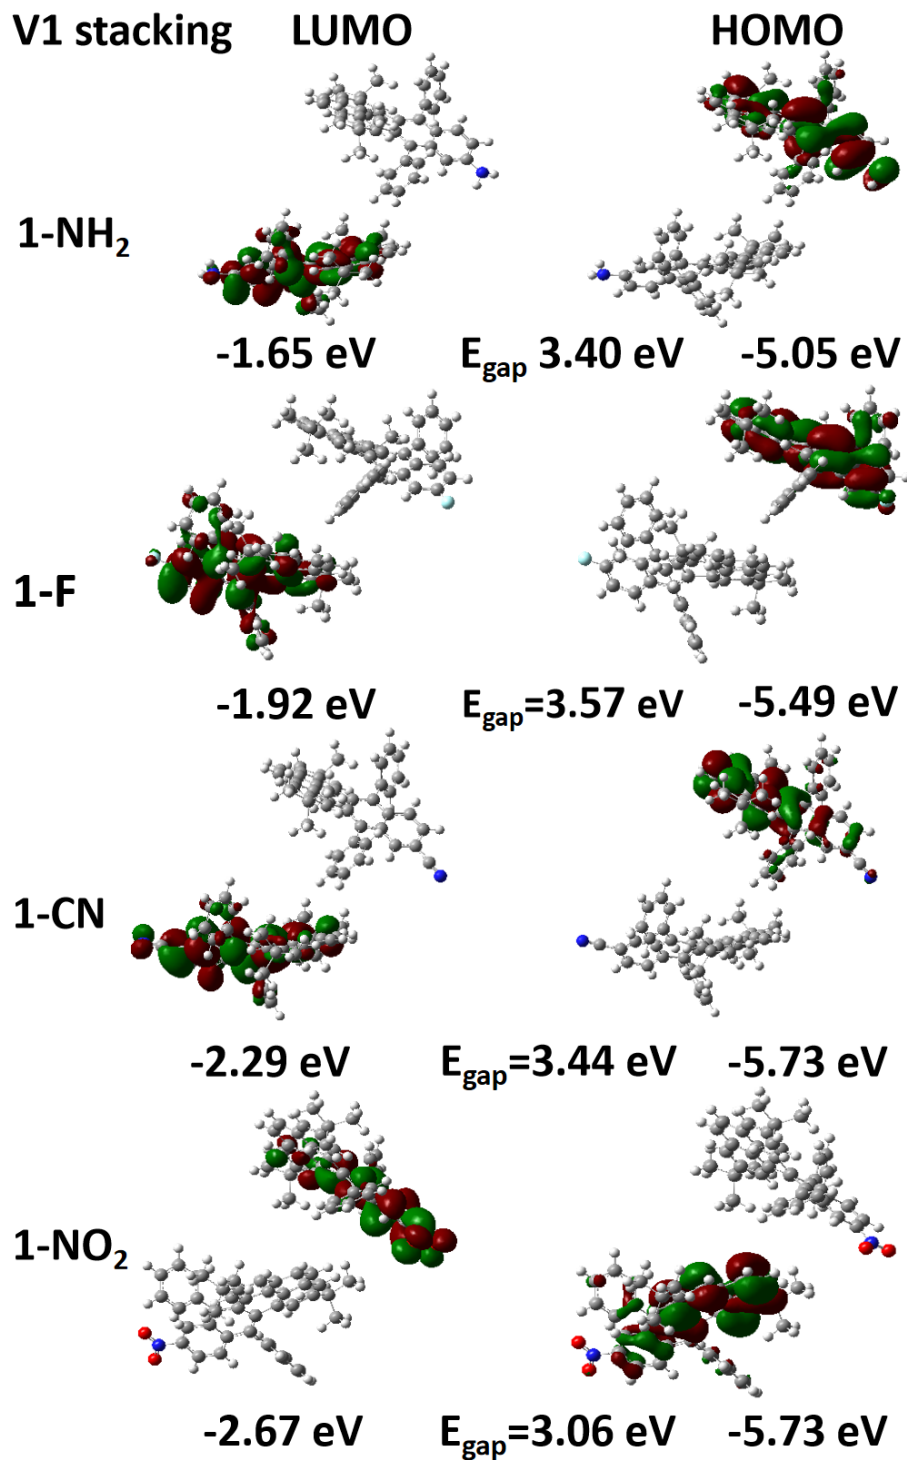

**Figure S25.** Energy levels of HOMOs and LUMOs at B3LYP/6-311G\*\* level for 1-NH<sub>2</sub>, 1-F, 1-CN and 1-NO<sub>2</sub> dimers along V1 stacking direction.

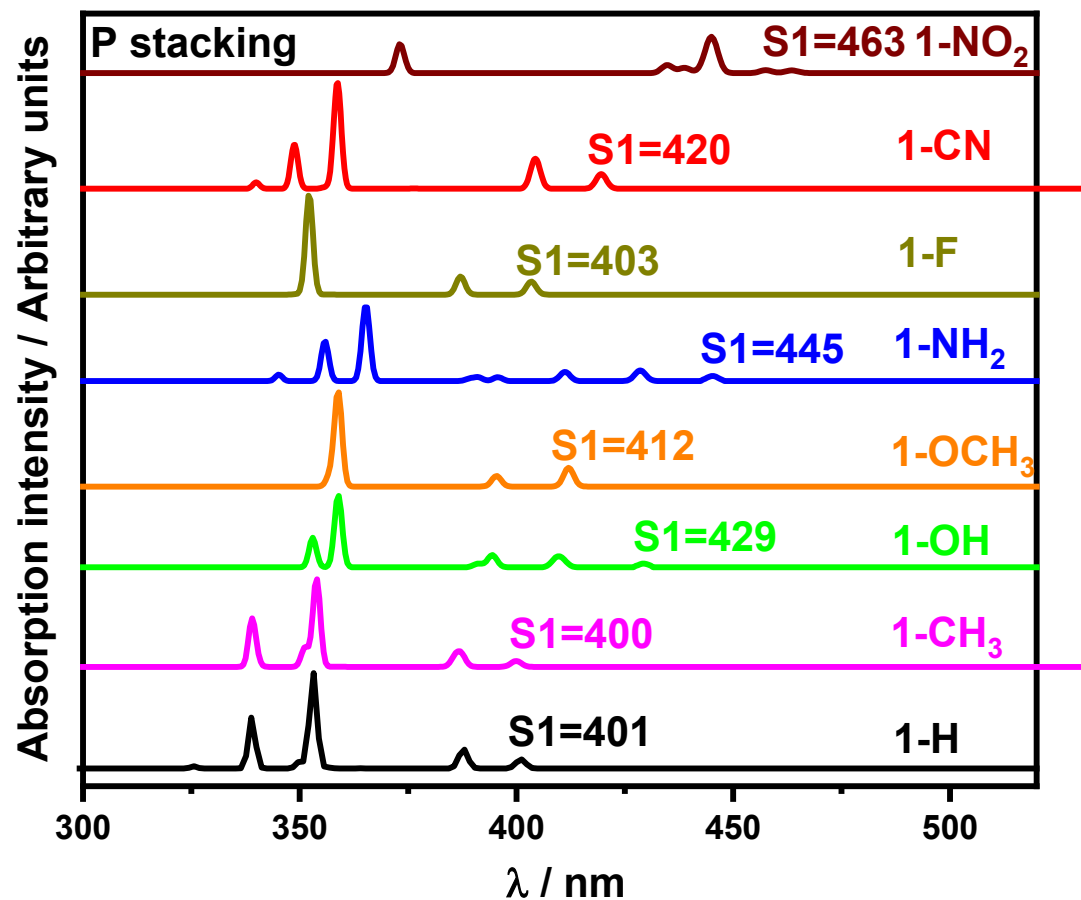

**Figure S26.** TD-DFT spectra at B3LYP/6-311G\*\* level of dimers for 1-H, 1-CH<sub>3</sub>, 1-OH, 1-OCH<sub>3</sub>, 1-NH<sub>2</sub>, 1-F, 1-CN and 1-NO<sub>2</sub> along P stacking direction.

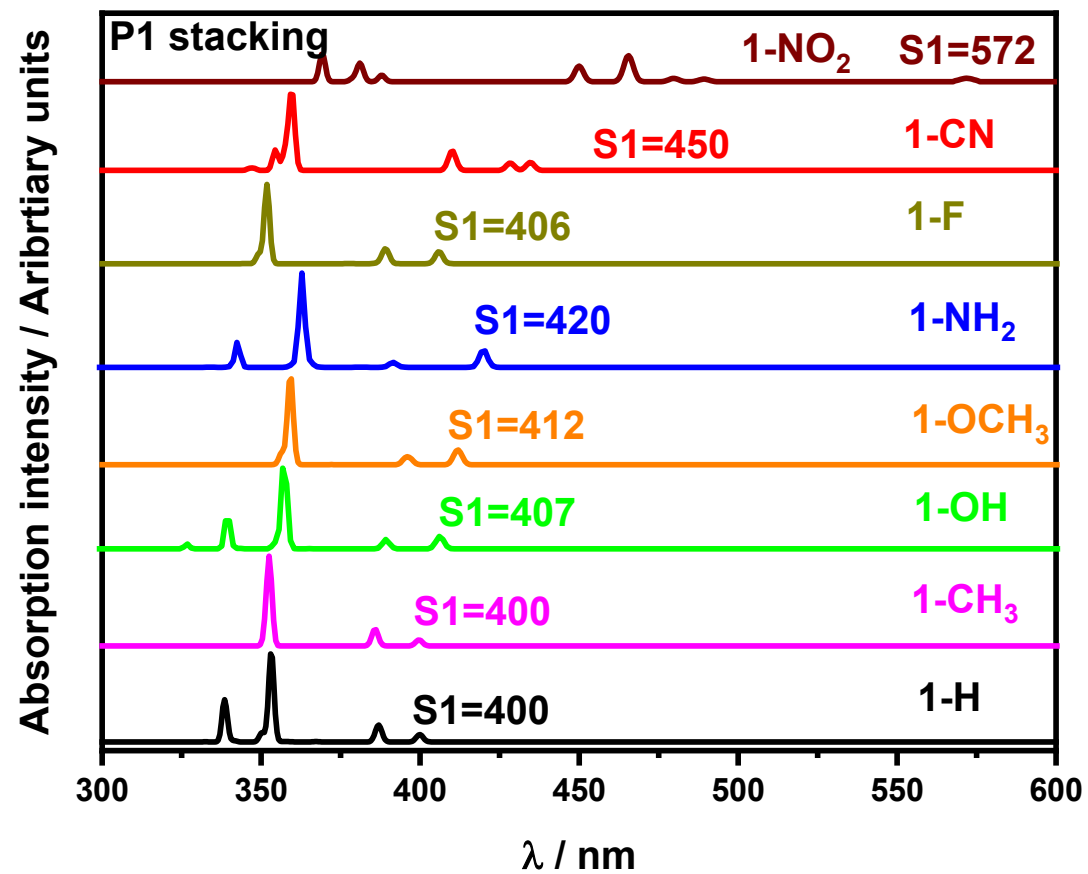

**Figure S27.** TD-DFT spectra at B3LYP/6-311G\*\* level of dimers for 1-H, 1-CH<sub>3</sub>, 1-OH, 1-OCH<sub>3</sub>, 1-NH<sub>2</sub>, 1-F, 1-CN and 1-NO<sub>2</sub> along P1 stacking direction.

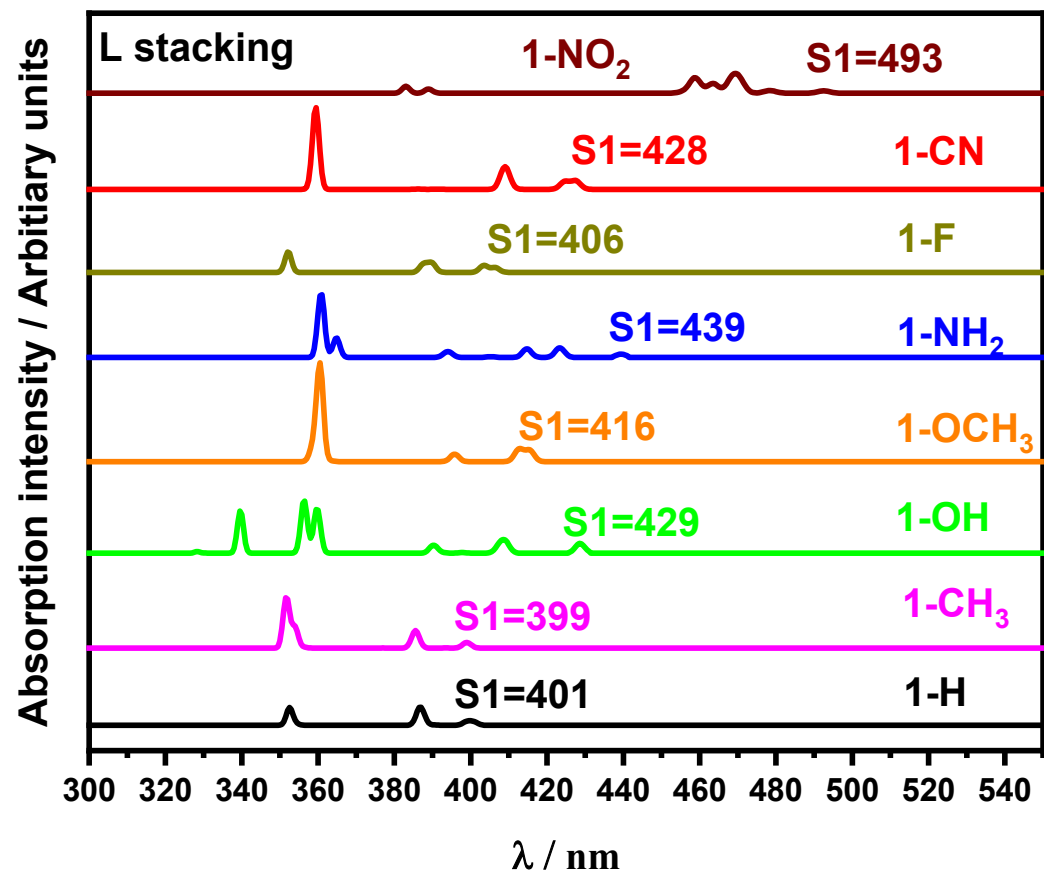

**Figure S28.** TD-DFT spectra at B3LYP/6-311G\*\* level of dimers for 1-H, 1-CH<sub>3</sub>, 1-OH, 1-OCH<sub>3</sub>, 1-NH<sub>2</sub>, 1-F, 1-CN and 1-NO<sub>2</sub> along L stacking direction.

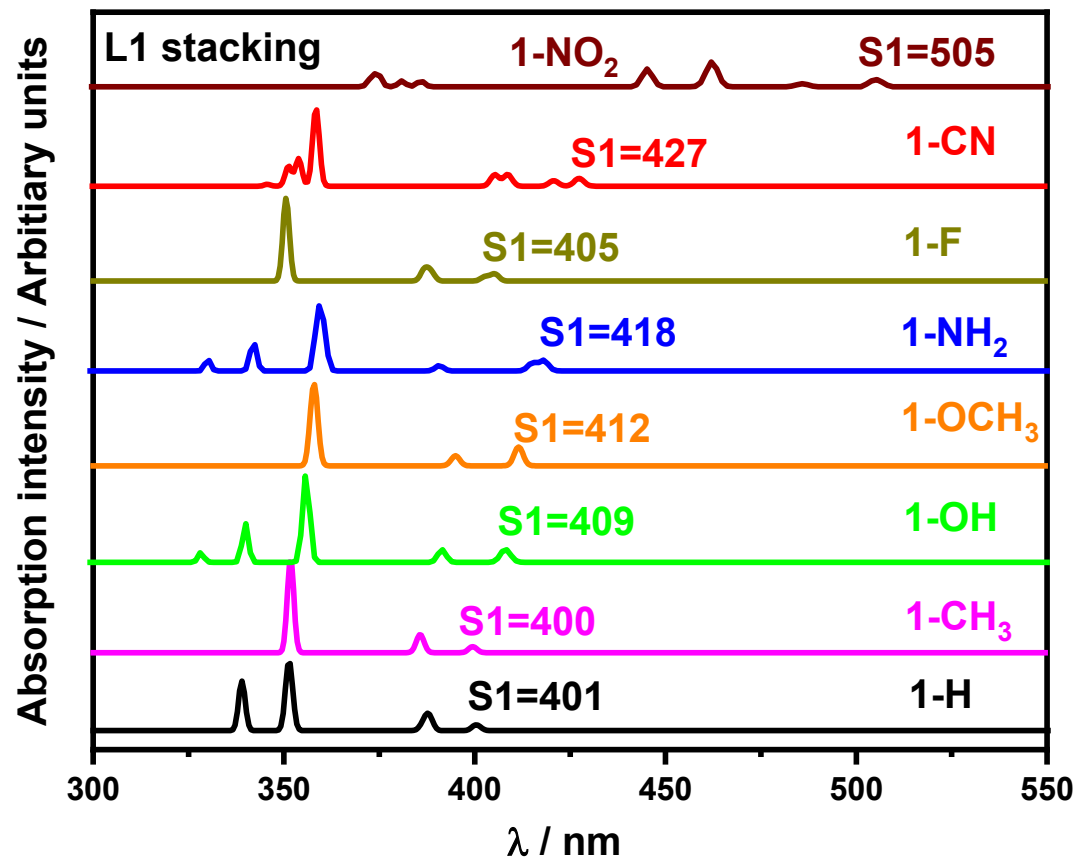

**Figure S29.** TD-DFT spectra at B3LYP/6-311G\*\* level of dimers for 1-H, 1-CH<sub>3</sub>, 1-OH, 1-OCH<sub>3</sub>, 1-NH<sub>2</sub>, 1-F, 1-CN and 1-NO<sub>2</sub> along L1 stacking direction.

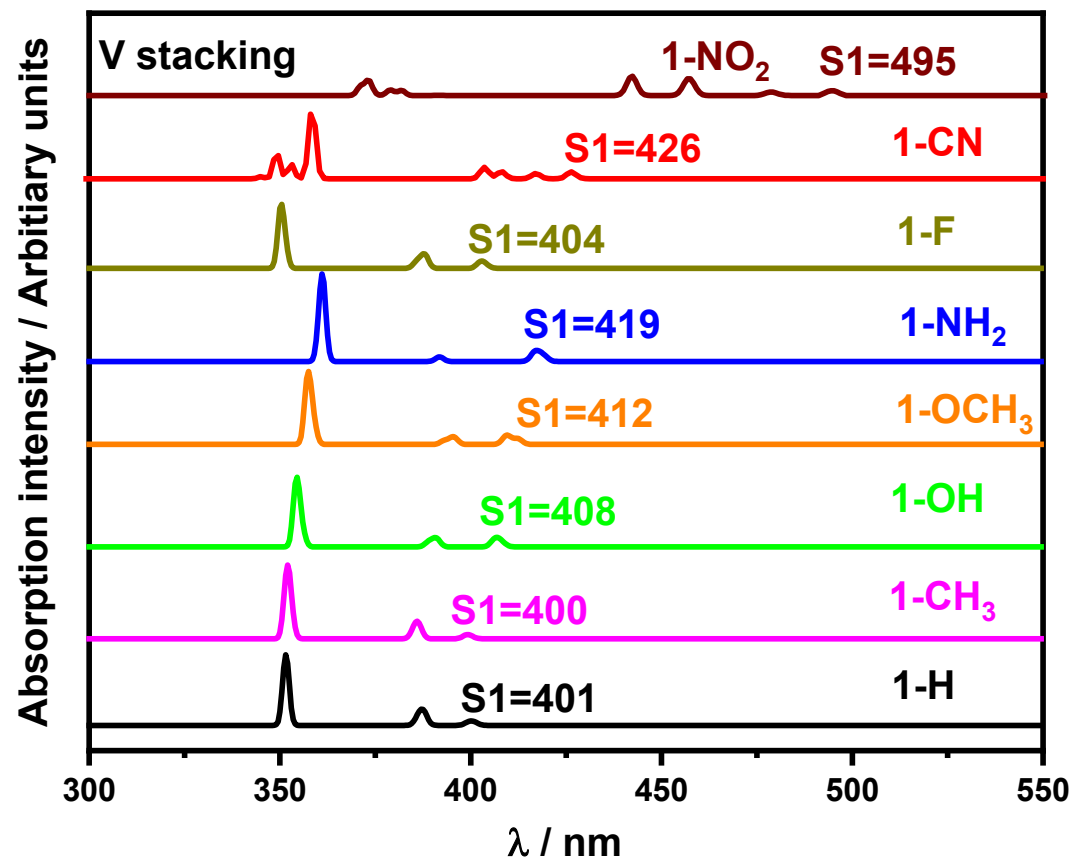

**Figure S30.** TD-DFT spectra at B3LYP/6-311G\*\* level of dimers for 1-H, 1-CH<sub>3</sub>, 1-OH, 1-OCH<sub>3</sub>, 1-NH<sub>2</sub>, 1-F, 1-CN and 1-NO<sub>2</sub> along V stacking direction.

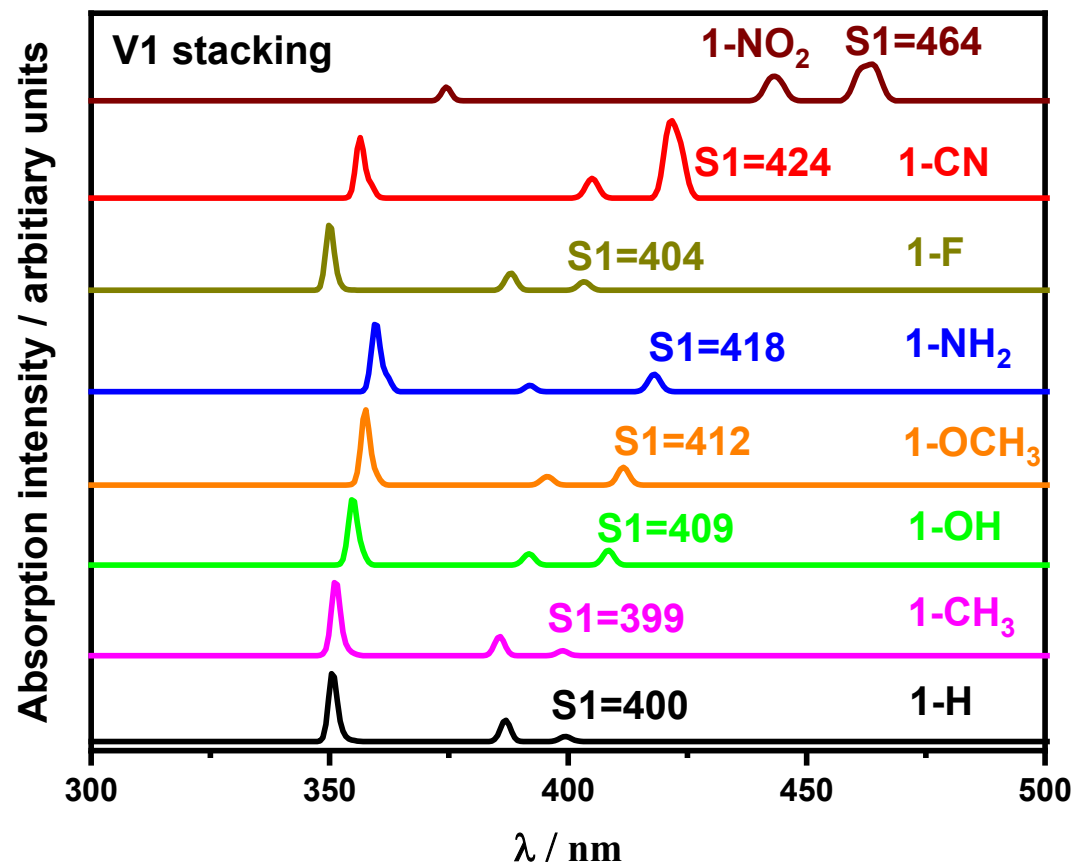

**Figure S31.** TD-DFT spectra at B3LYP/6-311G\*\* level of dimers for 1-H, 1-CH<sub>3</sub>, 1-OH, 1-OCH<sub>3</sub>, 1-NH<sub>2</sub>, 1-F, 1-CN and 1-NO<sub>2</sub> along V1 stacking direction.

**Table S1.** Benchmark calculation to get the proper computational level, taken the UV-vis peaks of 1-CH<sub>3</sub> and its experiment results as standard. The 6-311G\*\* basis set is used for all functionals except that the def2-TZVPP basis set is used for the M06-2X functional.

| Species           | Functionals        | LUMO<br>/ eV | HOMO<br>/ eV | <sup>a</sup> <i>E</i> <sub>gap</sub> / eV | S1 / nm                            | S4 / nm                            | S13 / nm         |
|-------------------|--------------------|--------------|--------------|-------------------------------------------|------------------------------------|------------------------------------|------------------|
| 1-CH <sub>3</sub> | B3LYP              | -1.72        | -5.40        | 3.67                                      | 399                                | 339                                | 280              |
|                   | B3LYP <sup>b</sup> | -1.77        | -5.46        | 3.69                                      | 398                                | 342                                | 280              |
|                   | M06-2X             | -0.99        | -6.58        | 5.59                                      | 343                                | 296                                | 240              |
|                   | CAM-B3LYP          | -0.57        | -6.62        | 6.05                                      | 338                                | 294                                | 235              |
|                   | ωB97XD             | -0.01        | -7.17        | 7.16                                      | 334                                | 293                                | 233              |
| 3a <sup>c</sup>   | -                  | -            | -5.32        | -                                         | 400 <sup>d</sup> /425 <sup>e</sup> | 333 <sup>f</sup> /343 <sup>g</sup> | 265 <sup>h</sup> |

<sup>a</sup>*E*<sub>gap</sub> is the energy difference between HOMO and LUMO.

<sup>b</sup>With the methylene chloride solvent.

<sup>c</sup>From Ref. *Dyes Pigments* **2015**, *112*, 176-182.

<sup>d</sup>Absorption shoulder peak in methylene chloride solvent which was not pointed out by authors.

<sup>e</sup>Absorption shoulder peak in thin film which was not pointed out by authors.

<sup>f</sup>Absorption peak in methylene chloride solvent.

<sup>g</sup>Absorption peak in thin film.

<sup>h</sup>Absorption peak in methylene chloride solvent which was not pointed out by authors.



**Table S2.** The twisted angles ( $\theta$ ) between the pyrene moieties and naphthalene units of 1-H and its derivatives.

| Species            | Twisted angle / ° | Species <sup>a</sup> | Twisted angle <sup>a</sup> / ° |
|--------------------|-------------------|----------------------|--------------------------------|
| 1-H                | 32.87             |                      |                                |
| 1-CH <sub>3</sub>  | 32.68             | 3a                   | 28.56                          |
| 1-OH               | 32.57             |                      |                                |
| 1-OCH <sub>3</sub> | 32.61             | 3b                   | 29.74                          |
| 1-NH <sub>2</sub>  | 32.58             |                      |                                |
| 1-F                | 32.50             | 3c                   | 36.26                          |
| 1-CN               | 33.02             |                      |                                |
| 1-NO <sub>2</sub>  | 32.95             |                      |                                |

<sup>a</sup> From Ref. *Dyes Pigments* **2015**, 112, 176-182.

**Table S3.** Computational energies at B3LYP/6-311G\*\* level for 1-H, 1-CH<sub>3</sub>, 1-OH, 1-OCH<sub>3</sub>, 1-NH<sub>2</sub>, 1-F, 1-CN and 1-NO<sub>2</sub> and the corresponding binding energies for the dimers along six different stacking patterns.

| Species                    | Stacking patterns | Electronic energy<br>(EE) / Hartree | Binding energy <sup>a</sup> /<br>kcal/mol |
|----------------------------|-------------------|-------------------------------------|-------------------------------------------|
| 1-H monomer                | -                 | -1700.034584                        |                                           |
|                            | P                 | -3400.527213                        | -1.62                                     |
|                            | P1                | -3400.530977                        | -3.98                                     |
| 1-H dimers                 | L                 | -3400.542901                        | -11.47                                    |
|                            | L1                | -3400.530091                        | -3.43                                     |
|                            | V                 | -3400.539011                        | -9.03                                     |
|                            | V1                | -3400.530983                        | -3.99                                     |
| 1-CH <sub>3</sub> monomer  | -                 | -1739.362765                        |                                           |
|                            | P                 | -3479.203182                        | -6.83                                     |
|                            | P1                | -3479.192477                        | -0.11                                     |
| 1-CH <sub>3</sub> dimers   | L                 | -3479.213127                        | -13.07                                    |
|                            | L1                | -3479.192373                        | -0.05                                     |
|                            | V                 | -3479.202457                        | -6.38                                     |
|                            | V1                | -3479.198512                        | -3.90                                     |
| 1-OH monomer               | -                 | -1775.277716                        |                                           |
|                            | P                 | -3551.033539                        | -11.48                                    |
|                            | P1                | -3551.023054                        | -4.90                                     |
| 1-OH dimers                | L                 | -3551.033412                        | -11.40                                    |
|                            | L1                | -3551.024371                        | -5.73                                     |
|                            | V                 | -3551.027941                        | -7.97                                     |
|                            | V1                | -3551.021420                        | -3.87                                     |
| 1-OCH <sub>3</sub> monomer | -                 | -1814.587124                        |                                           |
|                            | P                 | -3629.645443                        | -1.13                                     |
|                            | P1                | -3629.654287                        | -6.67                                     |
| 1-OCH <sub>3</sub> dimers  | L                 | -3629.660055                        | -10.29                                    |
|                            | L1                | -3629.650144                        | -4.08                                     |
|                            | V                 | -3629.658490                        | -9.31                                     |
|                            | V1                | -3629.650033                        | -4.01                                     |

|                           |    |              |        |
|---------------------------|----|--------------|--------|
| 1-NH <sub>2</sub> monomer | -  | -1755.408791 |        |
|                           | P  | -3511.293141 | -7.32  |
|                           | P1 | -3511.290903 | -5.92  |
| 1-NH <sub>2</sub> dimers  | L  | -3511.307940 | -16.61 |
|                           | L1 | -3511.286471 | -3.14  |
|                           | V  | -3511.296992 | -9.74  |
|                           | V1 | -3511.287594 | -3.84  |
| 1-F monomer               | -  | -1799.299373 |        |
|                           | P  | -3599.061681 | -4.25  |
|                           | P1 | -3599.062668 | -4.87  |
| 1-F dimers                | L  | -3599.071638 | -10.50 |
|                           | L1 | -3599.061644 | -4.23  |
|                           | V  | -3599.068529 | -8.55  |
|                           | V1 | -3599.061769 | -4.31  |
| 1-CN monomer              | -  | -1792.300579 |        |
|                           | P  | -3585.077264 | -6.88  |
|                           | P1 | -3585.072985 | -4.19  |
| 1-CN dimers               | L  | -3585.083345 | -10.70 |
|                           | L1 | -3585.071454 | -3.23  |
|                           | V  | -3585.080075 | -8.64  |
|                           | V1 | -3585.073206 | -4.33  |
| 1-NO <sub>2</sub> monomer | -  | -1904.592597 |        |
|                           | P  | -3809.662605 | -5.76  |
|                           | P1 | -3809.663790 | -6.50  |
| 1-NO <sub>2</sub> dimers  | L  | -3809.674086 | -12.96 |
|                           | L1 | -3809.662724 | -5.83  |
|                           | V  | -3809.664594 | -7.00  |
|                           | V1 | -3809.657548 | -2.58  |

<sup>a</sup>The binding energies are calculated as the difference between the total energy of the dimer and twice the total energy of a single molecule.

**Table S4.** The twisted angles between the pyrene moieties and naphthalene units ( $\theta$ ) of each molecule of the dimers for 1-H and its derivatives.

| Species            | Stacking patterns | <sup>a</sup> Twisted angle / ° |
|--------------------|-------------------|--------------------------------|
| 1-H                | P                 | 32.82/32.82                    |
| 1-CH <sub>3</sub>  |                   | 32.99/32.80                    |
| 1-OH               |                   | 32.68/32.79                    |
| 1-OCH <sub>3</sub> |                   | 32.55/32.63                    |
| 1-NH <sub>2</sub>  |                   | 32.81/32.78                    |
| 1-F                |                   | 32.54/32.54                    |
| 1-CN               |                   | 33.16/33.17                    |
| 1-NO <sub>2</sub>  |                   | 33.06/32.87                    |
| 1-H                |                   | P1                             |
| 1-CH <sub>3</sub>  | 32.78/32.82       |                                |
| 1-OH               | 32.16/32.29       |                                |
| 1-OCH <sub>3</sub> | 32.74/32.66       |                                |
| 1-NH <sub>2</sub>  | 32.16/32.29       |                                |
| 1-F                | 32.51/32.49       |                                |
| 1-CN               | 33.18/33.12       |                                |
| 1-NO <sub>2</sub>  | 33.00/32.89       |                                |
| 1-H                | L                 |                                |
| 1-CH <sub>3</sub>  |                   | 32.80/32.55                    |
| 1-OH               |                   | 32.51/32.71                    |
| 1-OCH <sub>3</sub> |                   | 32.80/32.41                    |
| 1-NH <sub>2</sub>  |                   | 32.70/31.91                    |
| 1-F                |                   | 32.51/32.63                    |
| 1-CN               |                   | 32.47/31.91                    |
| 1-NO <sub>2</sub>  |                   | 32.90/30.95                    |
| 1-H                |                   | L1                             |
| 1-CH <sub>3</sub>  | 32.70/32.71       |                                |
| 1-OH               | 32.58/32.35       |                                |
| 1-OCH <sub>3</sub> | 32.77/32.54       |                                |
| 1-NH <sub>2</sub>  | 32.33/32.56       |                                |

|                    |    |             |
|--------------------|----|-------------|
| 1-F                |    | 32.49/32.36 |
| 1-CN               |    | 33.05/32.89 |
| 1-NO <sub>2</sub>  |    | 32.90/32.78 |
| 1-H                |    | 32.73/33.25 |
| 1-CH <sub>3</sub>  |    | 32.49/33.03 |
| 1-OH               |    | 32.17/32.15 |
| 1-OCH <sub>3</sub> | V  | 32.49/32.57 |
| 1-NH <sub>2</sub>  |    | 32.53/32.86 |
| 1-F                |    | 32.21/32.37 |
| 1-CN               |    | 33.10/32.88 |
| 1-NO <sub>2</sub>  |    | 32.88/31.95 |
| 1-H                |    | 32.86/32.79 |
| 1-CH <sub>3</sub>  |    | 32.74/32.65 |
| 1-OH               |    | 32.61/32.54 |
| 1-OCH <sub>3</sub> | V1 | 32.64/32.59 |
| 1-NH <sub>2</sub>  |    | 32.63/32.51 |
| 1-F                |    | 32.49/32.48 |
| 1-CN               |    | 33.02/32.90 |
| 1-NO <sub>2</sub>  |    | 33.13/32.43 |

---

<sup>a</sup> Corresponding the twisted angle of each molecule of the dimer, respectively.

**Table S5.** TD-DFT results at B3LYP/6-311G\*\* level for the three lowest-lying singlet states for 1-H, 1-CH<sub>3</sub>, 1-OH, 1-OCH<sub>3</sub>, 1-NH<sub>2</sub>, 1-F, 1-CN and 1-NO<sub>2</sub>.

| Species            | States | Excitation energy / eV | Oscillator strengths | Wavelength / nm | <sup>a</sup> Dominant orbital transitions contributions (DOTC) |
|--------------------|--------|------------------------|----------------------|-----------------|----------------------------------------------------------------|
| 1-H                | S1     | 3.10                   | 0.0258               | 400.20          | H-1→L (75.32%), H→L+1 (22.75%)                                 |
|                    | S2     | 3.20                   | 0.0810               | 387.08          | H→L (93.60%)                                                   |
|                    | S3     | 3.53                   | 0.3345               | 351.19          | H→L+1 (70.80%), H-1→L (22.89%)                                 |
| 1-CH <sub>3</sub>  | S1     | 3.10                   | 0.0245               | 399.45          | H-1→L (51.82%), H→L (21.27%),<br>H→L+1 (20.02%)                |
|                    | S2     | 3.21                   | 0.0727               | 385.63          | H→L (69.55%), H-1→L (22.71%)                                   |
|                    | S3     | 3.52                   | 0.3741               | 351.75          | H→L+1 (60.99%), H-1→L (23.19%)                                 |
| 1-OH               | S1     | 3.03                   | 0.0603               | 408.82          | H→L (72.18%)                                                   |
|                    | S2     | 3.17                   | 0.0476               | 391.57          | H-1→L (63.63%), H→L (20.44%)                                   |
|                    | S3     | 3.49                   | 0.3371               | 355.38          | H→L+1 (63.83%), H-2→L (34.53%)                                 |
| 1-OCH <sub>3</sub> | S1     | 3.01                   | 0.0722               | 411.93          | H→L (75.91%)                                                   |
|                    | S2     | 3.14                   | 0.0348               | 395.38          | H-1→L (61.86%)                                                 |
|                    | S3     | 3.46                   | 0.3654               | 358.05          | H→L+1 (64.82%), H-1→L (25.59%)                                 |
| 1-NH <sub>2</sub>  | S1     | 2.96                   | 0.0728               | 418.52          | H→L (84.71%)                                                   |
|                    | S2     | 3.17                   | 0.0197               | 391.64          | H-1→L (56.09%), H→L+1 (31.28%)                                 |
|                    | S3     | 3.44                   | 0.3576               | 360.44          | H→L+1 (54.23%), H-1→L (37.39%)                                 |
| 1-F                | S1     | 3.07                   | 0.0421               | 404.11          | H→L (67.31%)                                                   |
|                    | S2     | 3.20                   | 0.0741               | 388.04          | H-1→L (73.15%)                                                 |
|                    | S3     | 3.54                   | 0.3115               | 350.53          | H→L+1 (40.61%), H-2→L (33.68%)                                 |
| 1-CN               | S1     | 2.93                   | 0.0491               | 422.54          | H→L (82.33%)                                                   |
|                    | S2     | 3.06                   | 0.0861               | 404.75          | H-1→L (89.22%)                                                 |
|                    | S3     | 3.47                   | 0.3108               | 357.21          | H-1→L+1 (75.98%)                                               |
| 1-NO <sub>2</sub>  | S1     | 2.69                   | 0.0256               | 461.12          | H→L (76.94%)                                                   |
|                    | S2     | 2.82                   | 0.1444               | 440.35          | H-1→L (79.37%)                                                 |
|                    | S3     | 3.32                   | 0.0625               | 373.76          | H→L+1 (63.97%)                                                 |

<sup>a</sup>H and L represent the highest occupied molecular orbital (HOMO) and lowest unoccupied molecular orbital (LUMO), respectively.

**Table S6.** The S1/S0 difference of twisting angles which are defined as  $\Delta\theta=|\theta(S1)-\theta(S0)|$ .

| Species            | $\Delta\theta_{C10-C11-C12} / ^\circ$ | Emission peak / nm |
|--------------------|---------------------------------------|--------------------|
| 1-H                | 0.2085                                | 441.83             |
| 1-CH <sub>3</sub>  | 0.2111                                | 443.82             |
| 1-OH               | 0.7941                                | 464.60             |
| 1-OCH <sub>3</sub> | 0.7269                                | 471.83             |
| 1-NH <sub>2</sub>  | 1.0353                                | 489.14             |
| 1-F                | 0.3918                                | 450.97             |
| 1-CN               | 1.0143                                | 470.61             |
| 1-NO <sub>2</sub>  | 2.3429                                | 548.94             |



**Table S7.** Second-order perturbation theory analysis of the Fock matrix based on NBO

for 1-H and its derivatives.

| Species            | Donor   | Type     | Acceptor | Type       | E(2) / kcal/mol |
|--------------------|---------|----------|----------|------------|-----------------|
| 1-H                | C11-H82 | $\sigma$ | C10-C16  | $\sigma^*$ | 4.89            |
|                    | C10-C16 | $\sigma$ | C11-H82  | $\sigma^*$ | 2.40            |
| 1-CH <sub>3</sub>  | C82-H84 | $\sigma$ | C11-C12  | $\sigma^*$ | 4.50            |
|                    | C10-C16 | $\sigma$ | C11-C82  | $\sigma^*$ | 3.71            |
| 1-OH               | O82     | n        | C10-C11  | $\pi^*$    | 28.02           |
|                    | C12-C13 | $\sigma$ | C11-O82  | $\sigma^*$ | 3.69            |
| 1-OCH <sub>3</sub> | O82     | n        | C10-C11  | $\pi^*$    | 27.92           |
|                    | C12-C13 | $\sigma$ | C11-O82  | $\sigma^*$ | 4.26            |
| 1-NH <sub>2</sub>  | N82     | n        | C10-C11  | $\pi^*$    | 27.74           |
|                    | C10-C16 | $\sigma$ | C11-N82  | $\sigma^*$ | 3.82            |
| 1-F                | F82     | n        | C10-C11  | $\pi^*$    | 19.27           |
|                    | C10-C16 | $\sigma$ | C11-F82  | $\sigma^*$ | 4.23            |
| 1-CN               | C11-C12 | $\pi^*$  | C82-N83  | $\pi^*$    | 25.29           |
|                    | N83     | n        | C11-C82  | $\sigma^*$ | 11.80           |
| 1-NO <sub>2</sub>  | C11-C12 | $\pi$    | N82-O83  | $\pi^*$    | 26.87           |
|                    | N82-O83 | $\pi^*$  | C11-C12  | $\pi^*$    | 20.52           |

**Table S8.** The optimized twisting angles ( $\theta_1$ ,  $\theta_2$ ,  $\theta_3$ ,  $\theta_4$  and  $\theta_5$  in degrees, see in Scheme 1a) and bond lengths ( $l_1$ ,  $l_2$ ,  $l_3$ ,  $l_4$  and  $l_5$  in Å) of 1-H and its derivatives in their S1 and T2 states.

| Species            | $\theta_1/\theta_2$ | $\theta_3/\theta_4$ | $\theta_5$ | $l_1/l_2$     | $l_3/l_4$     | $l_5$  |
|--------------------|---------------------|---------------------|------------|---------------|---------------|--------|
| S1                 |                     |                     |            |               |               |        |
| 1-H                | 56.7807/56.7693     | 3.6831/3.6874       | 0.5541     | 1.4847/1.4847 | 1.5402/1.5402 | 1.0843 |
| 1-CH <sub>3</sub>  | 58.5405/54.0585     | 2.7675/4.4571       | 0.7053     | 1.4865/1.4804 | 1.5403/1.5405 | 1.5069 |
| 1-OH               | 56.2207/55.5748     | 2.2031/4.5427       | 1.5823     | 1.4823/1.4822 | 1.5408/1.5405 | 1.3585 |
| 1-OCH <sub>3</sub> | 55.2923/55.9075     | 2.2895/4.4219       | 1.4872     | 1.4803/1.4827 | 1.5411/1.5405 | 1.3542 |
| 1-NH <sub>2</sub>  | 55.0262/57.8282     | 2.0336/4.1674       | 2.6240     | 1.4794/1.4873 | 1.5417/1.5404 | 1.3658 |
| 1-F                | 59.2318/54.1015     | 2.6388/4.6778       | 0.9789     | 1.4876/1.4796 | 1.5399/1.5405 | 1.3538 |
| 1-CN               | 55.6153/60.3218     | 2.6891/4.6248       | 0.4240     | 1.4825/1.4905 | 1.5401/1.5395 | 1.4210 |
| 1-NO <sub>2</sub>  | 53.1447/64.6517     | 2.5264/4.5512       | 1.4494     | 1.4822/1.4960 | 1.5398/1.5382 | 1.4237 |
| T2                 |                     |                     |            |               |               |        |
| 1-H                | 56.6928/56.6941     | 3.1179/3.1194       | 0.9483     | 1.4853/1.4853 | 1.5407/1.5407 | 1.0838 |
| 1-CH <sub>3</sub>  | 57.0338/56.5164     | 3.0944/3.1899       | 0.3573     | 1.4857/1.4853 | 1.5408/1.5407 | 1.5060 |
| 1-OH               | 57.6243/57.2539     | 2.934/3.3169        | 1.1754     | 1.4874/1.4869 | 1.5408/1.5407 | 1.3603 |
| 1-OCH <sub>3</sub> | 57.4559/57.4035     | 2.9907/3.1322       | 0.9485     | 1.4869/1.4870 | 1.5409/1.5407 | 1.3578 |
| 1-NH <sub>2</sub>  | 58.0731/58.1223     | 2.8200/3.1932       | 3.0258     | 1.4888/1.4891 | 1.5410/1.5405 | 1.3723 |
| 1-F                | 57.5082/56.4739     | 2.8998/3.2659       | 1.1351     | 1.4866/1.4852 | 1.5407/1.5406 | 1.3510 |
| 1-CN               | 55.2436/57.7412     | 2.9993/3.1205       | 1.0409     | 1.4834/1.4874 | 1.5403/1.5401 | 1.4222 |
| 1-NO <sub>2</sub>  | 54.4503/58.9637     | 2.8029/3.5710       | 1.6234     | 1.4829/1.4875 | 1.5401/1.5398 | 1.4469 |

**Table S9.** Hole and electron NTOs for the optimized S1 and T2 states of 1-H, 1-CH<sub>3</sub> and 1-OH.

| Species           | Hole                                                                                | Electron                                                                             |
|-------------------|-------------------------------------------------------------------------------------|--------------------------------------------------------------------------------------|
| 1-H               | Optimized S1                                                                        |                                                                                      |
|                   | 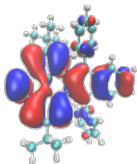   |    |
|                   | Optimized T2                                                                        |                                                                                      |
|                   |    |    |
| 1-CH <sub>3</sub> | Optimized S1                                                                        |                                                                                      |
|                   |   |   |
|                   | Optimized T2                                                                        |                                                                                      |
|                   |  |  |
| 1-OH              | Optimized S1                                                                        |                                                                                      |
|                   |  |  |
|                   | Optimized T2                                                                        |                                                                                      |
|                   |  |  |

**Table S10.** Hole and electron NTOs for the optimized S1 and T2 states of 1-OCH<sub>3</sub>, 1-NH<sub>2</sub>, and 1-F.

| Species            | Hole                                                                                | Electron                                                                             |
|--------------------|-------------------------------------------------------------------------------------|--------------------------------------------------------------------------------------|
| 1-OCH <sub>3</sub> | Optimized S1                                                                        |                                                                                      |
|                    | 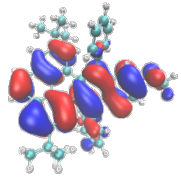   |    |
|                    | Optimized T2                                                                        |                                                                                      |
|                    |    |    |
| 1-NH <sub>2</sub>  | Optimized S1                                                                        |                                                                                      |
|                    |   |   |
|                    | Optimized T2                                                                        |                                                                                      |
|                    |  |  |
| 1-F                | Optimized S1                                                                        |                                                                                      |
|                    |  |  |
|                    | Optimized T2                                                                        |                                                                                      |
|                    |  |  |

**Table S11.** Hole and electron NTOs for the optimized S1 and T2 states of 1-CN and 1-NO<sub>2</sub>.

| Species           | Hole                                                                                | Electron                                                                             |
|-------------------|-------------------------------------------------------------------------------------|--------------------------------------------------------------------------------------|
| 1-CN              | Optimized S1                                                                        |                                                                                      |
|                   | 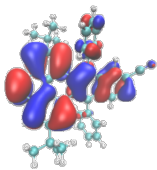   |    |
|                   | Optimized T2                                                                        |                                                                                      |
|                   |    |    |
| 1-NO <sub>2</sub> | Optimized S1                                                                        |                                                                                      |
|                   |   |   |
|                   | Optimized T2                                                                        |                                                                                      |
|                   |  |  |

**Table S12.** Intra-molecular hole and electron mobilities of 1-H and its derivatives.

| Species            | $\mu_h / \text{cm}^2 \cdot \text{V}^{-1} \cdot \text{s}^{-1}$ | $\mu_e / \text{cm}^2 \cdot \text{V}^{-1} \cdot \text{s}^{-1}$ |
|--------------------|---------------------------------------------------------------|---------------------------------------------------------------|
| 1-H                | 0.12                                                          | 10.73                                                         |
| 1-CH <sub>3</sub>  | 0.36                                                          | 7.88                                                          |
| 1-OH               | 2.88                                                          | 9.18                                                          |
| 1-OCH <sub>3</sub> | 4.16                                                          | 10.70                                                         |
| 1-NH <sub>2</sub>  | 3.35                                                          | 4.94                                                          |
| 1-F                | 0.38                                                          | 10.75                                                         |
| 1-CN               | 0.67                                                          | 23.37                                                         |
| 1-NO <sub>2</sub>  | 1.17                                                          | 20.82                                                         |

**Table S13.** The inter-molecular carrier mobilities of 1-H and its derivatives in different stacking patterns.

| Species            | Stacking patterns | $a_r / \text{\AA}$ | $\mu_e / \text{cm}^2\text{V}^{-1}\text{s}^{-1}$ | $\mu_h / \text{cm}^2\text{V}^{-1}\text{s}^{-1}$ | $b_r / \text{\AA}$ | $\mu_e / \text{cm}^2\text{V}^{-1}\text{s}^{-1}$ | $\mu_h / \text{cm}^2\text{V}^{-1}\text{s}^{-1}$ | $c_r / \text{\AA}$ | $\mu_e / \text{cm}^2\text{V}^{-1}\text{s}^{-1}$ | $\mu_h / \text{cm}^2\text{V}^{-1}\text{s}^{-1}$ |
|--------------------|-------------------|--------------------|-------------------------------------------------|-------------------------------------------------|--------------------|-------------------------------------------------|-------------------------------------------------|--------------------|-------------------------------------------------|-------------------------------------------------|
| 1-H                | P stacking        | 4.60               | $2.70 \times 10^{-3}$                           | $6.48 \times 10^{-4}$                           | 6.69               | $5.70 \times 10^{-3}$                           | $1.37 \times 10^{-3}$                           | 13.64              | $2.37 \times 10^{-2}$                           | $5.70 \times 10^{-3}$                           |
| 1-CH <sub>3</sub>  |                   | 4.43               | $1.21 \times 10^{-1}$                           | $1.28 \times 10^{-1}$                           | 6.73               | $2.80 \times 10^{-1}$                           | $2.95 \times 10^{-1}$                           | 11.58              | $8.28 \times 10^{-1}$                           | $8.73 \times 10^{-1}$                           |
| 1-OH               |                   | 4.69               | 2.88                                            | 1.76                                            | 6.84               | 6.12                                            | 3.74                                            | 12.40              | 20.09                                           | 12.29                                           |
| 1-OCH <sub>3</sub> |                   | 6.84               | $1.74 \times 10^{-1}$                           | $2.76 \times 10^{-1}$                           | 10.43              | $4.04 \times 10^{-1}$                           | $6.42 \times 10^{-1}$                           | 16.79              | 1.05                                            | 1.66                                            |
| 1-NH <sub>2</sub>  |                   | 4.85               | 1.72                                            | 1.92                                            | 7.18               | 3.76                                            | 4.21                                            | 13.93              | 14.16                                           | 15.85                                           |
| 1-F                |                   | 4.93               | $6.02 \times 10^{-4}$                           | $3.67 \times 10^{-6}$                           | 6.88               | $1.18 \times 10^{-3}$                           | $7.17 \times 10^{-6}$                           | 14.18              | $4.99 \times 10^{-3}$                           | $3.04 \times 10^{-5}$                           |
| 1-CN               |                   | 4.92               | $6.03 \times 10^{-3}$                           | $2.58 \times 10^{-4}$                           | 7.98               | $1.59 \times 10^{-2}$                           | $6.82 \times 10^{-4}$                           | 15.31              | $5.85 \times 10^{-2}$                           | $2.51 \times 10^{-3}$                           |
| 1-NO <sub>2</sub>  |                   | 4.45               | $2.14 \times 10^{-1}$                           | $7.30 \times 10^{-2}$                           | 7.57               | $6.20 \times 10^{-1}$                           | $2.11 \times 10^{-1}$                           | 14.33              | 2.22                                            | $7.57 \times 10^{-1}$                           |
| 1-H                | P1 stacking       | 4.16               | $7.21 \times 10^{-2}$                           | $5.38 \times 10^{-2}$                           | 6.20               | $1.60 \times 10^{-1}$                           | $1.19 \times 10^{-1}$                           | 12.57              | $6.60 \times 10^{-1}$                           | $4.92 \times 10^{-1}$                           |
| 1-CH <sub>3</sub>  |                   | 8.93               | $2.56 \times 10^{-2}$                           | $4.70 \times 10^{-2}$                           | 11.82              | $4.49 \times 10^{-2}$                           | $8.23 \times 10^{-2}$                           | 18.50              | $1.10 \times 10^{-1}$                           | $2.02 \times 10^{-1}$                           |
| 1-OH               |                   | 4.51               | $5.38 \times 10^{-1}$                           | $8.63 \times 10^{-1}$                           | 6.16               | 1.00                                            | 1.61                                            | 12.72              | 4.27                                            | 6.86                                            |
| 1-OCH <sub>3</sub> |                   | 4.90               | $5.23 \times 10^{-2}$                           | $1.12 \times 10^{-1}$                           | 7.28               | $1.15 \times 10^{-1}$                           | $2.48 \times 10^{-1}$                           | 13.35              | $3.88 \times 10^{-1}$                           | $8.33 \times 10^{-1}$                           |
| 1-NH <sub>2</sub>  |                   | 4.50               | $4.01 \times 10^{-1}$                           | $3.09 \times 10^{-1}$                           | 6.16               | $7.50 \times 10^{-1}$                           | $5.77 \times 10^{-1}$                           | 12.72              | 3.20                                            | 2.47                                            |
| 1-F                |                   | 4.88               | $4.27 \times 10^{-1}$                           | $9.46 \times 10^{-2}$                           | 6.81               | $8.30 \times 10^{-1}$                           | $1.84 \times 10^{-1}$                           | 13.35              | 3.19                                            | $7.07 \times 10^{-1}$                           |
| 1-CN               |                   | 5.10               | 4.91                                            | $9.84 \times 10^{-1}$                           | 8.97               | 15.17                                           | 3.04                                            | 15.53              | 45.49                                           | 9.11                                            |
| 1-NO <sub>2</sub>  |                   | 5.00               | 3.83                                            | 1.17                                            | 8.16               | 10.18                                           | 3.12                                            | 14.72              | 33.15                                           | 10.16                                           |
| 1-H                | L stacking        | 4.72               | $6.34 \times 10^{-1}$                           | $1.06 \times 10^{-2}$                           | 5.36               | $8.18 \times 10^{-1}$                           | $1.37 \times 10^{-1}$                           | 8.42               | 2.02                                            | $3.39 \times 10^{-1}$                           |
| 1-CH <sub>3</sub>  |                   | 4.43               | $6.64 \times 10^{-1}$                           | $2.16 \times 10^{-1}$                           | 5.37               | $9.74 \times 10^{-1}$                           | $3.17 \times 10^{-1}$                           | 8.44               | 2.41                                            | $7.83 \times 10^{-1}$                           |
| 1-OH               |                   | 3.82               | 1.12                                            | 1.03                                            | 7.59               | 4.41                                            | 4.05                                            | 9.59               | 7.02                                            | 6.45                                            |
| 1-OCH <sub>3</sub> |                   | 6.38               | $9.91 \times 10^{-1}$                           | 1.42                                            | 5.66               | $7.80 \times 10^{-1}$                           | 1.12                                            | 10.20              | 2.53                                            | 3.63                                            |

|                    |             |       |                       |                       |       |                       |                       |       |                       |                       |
|--------------------|-------------|-------|-----------------------|-----------------------|-------|-----------------------|-----------------------|-------|-----------------------|-----------------------|
| 1-NH <sub>2</sub>  |             | 4.40  | 6.45×10 <sup>-1</sup> | 8.54×10 <sup>-1</sup> | 6.13  | 1.25                  | 1.66                  | 8.25  | 2.27                  | 3.00                  |
| 1-F                |             | 4.69  | 5.19×10 <sup>-1</sup> | 1.61×10 <sup>-1</sup> | 5.42  | 6.93×10 <sup>-1</sup> | 2.15×10 <sup>-1</sup> | 8.64  | 1.76                  | 5.45E-01              |
| 1-CN               |             | 6.83  | 1.21×10 <sup>-2</sup> | 1.31×10 <sup>-1</sup> | 6.43  | 1.07×10 <sup>-2</sup> | 1.17×10 <sup>-1</sup> | 9.87  | 2.53×10 <sup>-2</sup> | 2.75×10 <sup>-1</sup> |
| 1-NO <sub>2</sub>  |             | 7.70  | 9.79×10 <sup>-2</sup> | 1.79×10 <sup>-1</sup> | 6.67  | 7.33×10 <sup>-2</sup> | 1.34×10 <sup>-1</sup> | 10.58 | 1.85×10 <sup>-1</sup> | 3.37×10 <sup>-1</sup> |
| 1-H                |             | 6.34  | 1.42×10 <sup>-1</sup> | 7.71×10 <sup>-2</sup> | 7.57  | 2.03×10 <sup>-1</sup> | 1.10×10 <sup>-1</sup> | 11.72 | 4.86×10 <sup>-1</sup> | 2.64×10 <sup>-1</sup> |
| 1-CH <sub>3</sub>  |             | 10.61 | 5.27×10 <sup>-4</sup> | 1.35×10 <sup>-3</sup> | 13.50 | 8.52×10 <sup>-4</sup> | 2.19×10 <sup>-3</sup> | 21.02 | 2.07×10 <sup>-3</sup> | 5.31×10 <sup>-3</sup> |
| 1-OH               |             | 4.33  | 1.61×10 <sup>-2</sup> | 3.55×10 <sup>-2</sup> | 7.07  | 4.28×10 <sup>-2</sup> | 9.47×10 <sup>-2</sup> | 13.99 | 1.68×10 <sup>-1</sup> | 3.71×10 <sup>-1</sup> |
| 1-OCH <sub>3</sub> | L1 stacking | 4.96  | 3.18×10 <sup>-1</sup> | 4.82×10 <sup>-1</sup> | 7.25  | 6.78×10 <sup>-1</sup> | 1.03                  | 14.17 | 2.59                  | 3.93                  |
| 1-NH <sub>2</sub>  |             | 5.14  | 1.46×10 <sup>-1</sup> | 1.91×10 <sup>-1</sup> | 7.07  | 2.76×10 <sup>-1</sup> | 3.62×10 <sup>-1</sup> | 13.86 | 1.06                  | 1.39                  |
| 1-F                |             | 4.51  | 3.11×10 <sup>-1</sup> | 1.31×10 <sup>-1</sup> | 6.67  | 6.80×10 <sup>-1</sup> | 2.86×10 <sup>-1</sup> | 13.71 | 2.87                  | 1.21                  |
| 1-CN               |             | 5.01  | 3.51                  | 1.69×10 <sup>-1</sup> | 8.98  | 11.29                 | 5.44×10 <sup>-1</sup> | 16.76 | 39.27                 | 1.89                  |
| 1-NO <sub>2</sub>  |             | 5.30  | 3.55                  | 1.93×10 <sup>-1</sup> | 8.14  | 8.37                  | 4.56×10 <sup>-1</sup> | 15.48 | 30.29                 | 1.65                  |
| 1-H                |             | 5.79  | 3.39×10 <sup>-2</sup> | 1.86×10 <sup>-2</sup> | 5.27  | 2.80×10 <sup>-2</sup> | 1.53×10 <sup>-2</sup> | 9.03  | 8.24×10 <sup>-2</sup> | 4.51×10 <sup>-2</sup> |
| 1-CH <sub>3</sub>  |             | 6.66  | 5.76×10 <sup>-1</sup> | 1.83×10 <sup>-1</sup> | 5.49  | 3.92×10 <sup>-1</sup> | 1.24×10 <sup>-1</sup> | 10.64 | 1.47                  | 4.66×10 <sup>-1</sup> |
| 1-OH               |             | 5.01  | 1.87×10 <sup>-2</sup> | 7.18×10 <sup>-2</sup> | 5.38  | 2.16×10 <sup>-2</sup> | 8.28×10 <sup>-2</sup> | 10.23 | 7.81×10 <sup>-2</sup> | 3.00×10 <sup>-1</sup> |
| 1-OCH <sub>3</sub> | V stacking  | 4.99  | 1.66×10 <sup>-2</sup> | 5.88×10 <sup>-4</sup> | 5.29  | 1.86×10 <sup>-2</sup> | 6.60×10 <sup>-4</sup> | 10.34 | 7.12×10 <sup>-2</sup> | 2.53×10 <sup>-3</sup> |
| 1-NH <sub>2</sub>  |             | 4.61  | 3.64×10 <sup>-1</sup> | 2.47×10 <sup>-1</sup> | 5.33  | 4.86×10 <sup>-2</sup> | 3.30×10 <sup>-1</sup> | 10.45 | 1.87                  | 1.27                  |
| 1-F                |             | 4.99  | 6.90×10 <sup>-4</sup> | 1.66×10 <sup>-3</sup> | 5.31  | 7.83×10 <sup>-4</sup> | 1.88×10 <sup>-3</sup> | 10.38 | 2.99×10 <sup>-3</sup> | 7.18×10 <sup>-3</sup> |
| 1-CN               |             | 4.75  | 9.90×10 <sup>-1</sup> | 6.77×10 <sup>-2</sup> | 5.52  | 1.34                  | 9.14×10 <sup>-2</sup> | 10.69 | 5.00                  | 3.42×10 <sup>-1</sup> |
| 1-NO <sub>2</sub>  |             | 4.43  | 1.64                  | 7.22×10 <sup>-2</sup> | 7.31  | 4.48                  | 1.97×10 <sup>-1</sup> | 12.14 | 12.33                 | 5.42×10 <sup>-1</sup> |
| 1-H                |             | 9.86  | 6.49×10 <sup>-1</sup> | 1.99×10 <sup>-1</sup> | 6.01  | 2.41×10 <sup>-1</sup> | 7.37×10 <sup>-2</sup> | 11.70 | 9.13×10 <sup>-1</sup> | 2.79×10 <sup>-1</sup> |
| 1-CH <sub>3</sub>  | V1 stacking | 9.85  | 4.98×10 <sup>-1</sup> | 3.78×10 <sup>-1</sup> | 6.05  | 1.88×10 <sup>-1</sup> | 1.43×10 <sup>-1</sup> | 11.77 | 7.11×10 <sup>-1</sup> | 5.39×10 <sup>-1</sup> |
| 1-OH               |             | 9.77  | 1.92×10 <sup>-1</sup> | 2.77×10 <sup>-1</sup> | 6.06  | 7.38×10 <sup>-2</sup> | 1.06×10 <sup>-1</sup> | 11.84 | 2.82×10 <sup>-1</sup> | 4.07×10 <sup>-1</sup> |



|                    |      |                       |                       |      |                       |                       |       |                       |                       |
|--------------------|------|-----------------------|-----------------------|------|-----------------------|-----------------------|-------|-----------------------|-----------------------|
| 1-OCH <sub>3</sub> | 9.83 | 2.43×10 <sup>-1</sup> | 3.01×10 <sup>-1</sup> | 6.05 | 9.20×10 <sup>-2</sup> | 1.14×10 <sup>-1</sup> | 11.56 | 3.36×10 <sup>-1</sup> | 4.17×10 <sup>-1</sup> |
| 1-NH <sub>2</sub>  | 9.92 | 4.19×10 <sup>-1</sup> | 2.95×10 <sup>-1</sup> | 6.08 | 1.58×10 <sup>-1</sup> | 1.11×10 <sup>-1</sup> | 11.82 | 5.94×10 <sup>-1</sup> | 4.19×10 <sup>-1</sup> |
| 1-F                | 9.91 | 3.71×10 <sup>-1</sup> | 3.61×10 <sup>-1</sup> | 5.95 | 1.34×10 <sup>-1</sup> | 1.30×10 <sup>-1</sup> | 11.29 | 4.82×10 <sup>-1</sup> | 4.69×10 <sup>-1</sup> |
| 1-CN               | 9.62 | 4.32×10 <sup>-2</sup> | 2.77×10 <sup>-1</sup> | 5.92 | 1.64×10 <sup>-2</sup> | 1.05×10 <sup>-1</sup> | 11.34 | 6.01×10 <sup>-2</sup> | 3.85×10 <sup>-1</sup> |
| 1-NO <sub>2</sub>  | 9.03 | 4.17×10 <sup>-1</sup> | 7.99×10 <sup>-1</sup> | 7.19 | 2.64×10 <sup>-1</sup> | 5.06×10 <sup>-1</sup> | 11.74 | 7.06×10 <sup>-1</sup> | 1.35                  |

The three distances along with carrier mobilities are listed. <sup>a</sup>The distance between benzene ring and substituent group. <sup>b</sup>The distance between two benzene rings. <sup>c</sup>The distance of the centre of mass of two adjacent molecules. The relative shortest distance is used in Figure 5 and Figure S2-S7.

**Table S14.** The electronic coupling terms, reorganization energies and transport rate constants of 1-H and its derivatives at P stacking pattern.

| Species            | $V_h$ / kJ/mol | $V_e$ / kJ/mol | $\lambda_h$ / kJ/mol | $\lambda_e$ / kJ/mol | $k_h$ / s <sup>-1</sup> | $k_e$ / s <sup>-1</sup> |
|--------------------|----------------|----------------|----------------------|----------------------|-------------------------|-------------------------|
| 1-H                | 0.16           | 0.43           | 18.54                | 23.33                | $1.57 \times 10^{10}$   | $6.54 \times 10^{10}$   |
| 1-CH <sub>3</sub>  | 2.44           | 3.33           | 19.51                | 24.99                | $3.34 \times 10^{12}$   | $3.17 \times 10^{12}$   |
| 1-OH               | 10.40          | 17.01          | 22.63                | 26.70                | $4.10 \times 10^{13}$   | $6.71 \times 10^{13}$   |
| 1-OCH <sub>3</sub> | 2.90           | 2.76           | 23.08                | 26.05                | $3.03 \times 10^{12}$   | $1.91 \times 10^{12}$   |
| 1-NH <sub>2</sub>  | 18.00          | 15.25          | 31.64                | 29.78                | $4.19 \times 10^{13}$   | $3.75 \times 10^{13}$   |
| 1-F                | 0.01           | 0.22           | 21.25                | 25.88                | $7.77 \times 10^7$      | $1.27 \times 10^{10}$   |
| 1-CN               | 0.11           | 0.60           | 20.45                | 23.27                | $5.49 \times 10^9$      | $1.28 \times 10^{11}$   |
| 1-NO <sub>2</sub>  | 1.93           | 6.21           | 20.29                | 30.73                | $1.89 \times 10^{12}$   | $5.55 \times 10^{12}$   |

**Table S15.** The electronic coupling terms, reorganization energies and transport rate constants of 1-H and its derivatives at P1 stacking pattern.

| Species            | $V_h$ / kJ/mol | $V_e$ / kJ/mol | $\lambda_h$ / kJ/mol | $\lambda_e$ / kJ/mol | $k_h$ / s <sup>-1</sup> | $k_e$ / s <sup>-1</sup> |
|--------------------|----------------|----------------|----------------------|----------------------|-------------------------|-------------------------|
| 1-H                | 1.59           | 2.48           | 18.54                | 23.33                | $1.60 \times 10^{12}$   | $2.14 \times 10^{12}$   |
| 1-CH <sub>3</sub>  | 0.74           | 0.76           | 19.51                | 24.99                | $3.02 \times 10^{11}$   | $1.65 \times 10^{11}$   |
| 1-OH               | 7.57           | 7.65           | 22.63                | 26.70                | $2.17 \times 10^{13}$   | $1.36 \times 10^{13}$   |
| 1-OCH <sub>3</sub> | 2.59           | 2.11           | 23.08                | 26.05                | $2.40 \times 10^{12}$   | $1.12 \times 10^{12}$   |
| 1-NH <sub>2</sub>  | 7.78           | 7.96           | 31.64                | 29.78                | $7.82 \times 10^{12}$   | $1.02 \times 10^{13}$   |
| 1-F                | 2.13           | 6.00           | 21.25                | 25.88                | $2.04 \times 10^{12}$   | $9.19 \times 10^{12}$   |
| 1-CN               | 6.25           | 16.62          | 20.45                | 23.27                | $1.94 \times 10^{13}$   | $9.69 \times 10^{13}$   |
| 1-NO <sub>2</sub>  | 6.89           | 23.39          | 20.29                | 30.73                | $2.41 \times 10^{13}$   | $7.86 \times 10^{13}$   |

**Table S16.** The electronic coupling terms, reorganization energies and transport rate constants of 1-H and its derivatives at L stacking pattern.

| Species            | $V_h$ / kJ/mol | $V_e$ / kJ/mol | $\lambda_h$ / kJ/mol | $\lambda_e$ / kJ/mol | $k_h$ / s <sup>-1</sup> | $k_e$ / s <sup>-1</sup> |
|--------------------|----------------|----------------|----------------------|----------------------|-------------------------|-------------------------|
| 1-H                | 1.97           | 6.48           | 18.54                | 23.33                | $2.45 \times 10^{12}$   | $1.46 \times 10^{13}$   |
| 1-CH <sub>3</sub>  | 3.18           | 7.81           | 19.51                | 24.99                | $5.65 \times 10^{12}$   | $1.74 \times 10^{13}$   |
| 1-OH               | 9.75           | 13.02          | 22.63                | 26.70                | $3.61 \times 10^{13}$   | $3.92 \times 10^{13}$   |
| 1-OCH <sub>3</sub> | 7.06           | 7.06           | 23.08                | 26.05                | $1.79 \times 10^{13}$   | $1.25 \times 10^{13}$   |
| 1-NH <sub>2</sub>  | 13.25          | 10.32          | 31.64                | 29.78                | $2.26 \times 10^{13}$   | $1.71 \times 10^{13}$   |
| 1-F                | 2.89           | 6.89           | 21.25                | 25.88                | $3.75 \times 10^{12}$   | $1.21 \times 10^{13}$   |
| 1-CN               | 1.71           | 0.62           | 20.45                | 23.27                | $1.45 \times 10^{12}$   | $1.34 \times 10^{11}$   |
| 1-NO <sub>2</sub>  | 1.75           | 2.43           | 20.29                | 30.73                | $1.55 \times 10^{12}$   | $8.47 \times 10^{11}$   |

**Table S17.** The electronic coupling terms, reorganization energies and transport rate constants of 1-H and its derivatives at L1 stacking pattern.

| Species            | $V_h$ / kJ/mol | $V_e$ / kJ/mol | $\lambda_h$ / kJ/mol | $\lambda_e$ / kJ/mol | $k_h$ / s <sup>-1</sup> | $k_e$ / s <sup>-1</sup> |
|--------------------|----------------|----------------|----------------------|----------------------|-------------------------|-------------------------|
| 1-H                | 1.25           | 2.28           | 18.54                | 23.33                | $9.84 \times 10^{11}$   | $1.82 \times 10^{12}$   |
| 1-CH <sub>3</sub>  | 0.11           | 0.09           | 19.51                | 24.99                | $6.17 \times 10^9$      | $2.40 \times 10^9$      |
| 1-OH               | 1.60           | 1.38           | 22.63                | 26.70                | $9.72 \times 10^{11}$   | $4.40 \times 10^{11}$   |
| 1-OCH <sub>3</sub> | 5.29           | 5.15           | 23.08                | 26.05                | $1.00 \times 10^{13}$   | $6.63 \times 10^{12}$   |
| 1-NH <sub>2</sub>  | 5.37           | 4.20           | 31.64                | 29.78                | $3.72 \times 10^{12}$   | $2.83 \times 10^{12}$   |
| 1-F                | 2.70           | 5.54           | 21.25                | 25.88                | $3.29 \times 10^{12}$   | $7.84 \times 10^{12}$   |
| 1-CN               | 2.64           | 14.31          | 20.45                | 23.27                | $3.46 \times 10^{12}$   | $7.18 \times 10^{13}$   |
| 1-NO <sub>2</sub>  | 2.64           | 21.25          | 20.29                | 30.73                | $3.53 \times 10^{12}$   | $6.49 \times 10^{13}$   |

**Table S18.** The electronic coupling terms, reorganization energies and transport rate constants of 1-H and its derivatives at V stacking pattern.

| Species            | $V_h$ / kJ/mol | $V_e$ / kJ/mol | $\lambda_h$ / kJ/mol | $\lambda_e$ / kJ/mol | $k_h$ / s <sup>-1</sup> | $k_e$ / s <sup>-1</sup> |
|--------------------|----------------|----------------|----------------------|----------------------|-------------------------|-------------------------|
| 1-H                | 0.67           | 1.22           | 18.54                | 23.33                | $2.84 \times 10^{11}$   | $5.19 \times 10^{11}$   |
| 1-CH <sub>3</sub>  | 1.94           | 4.84           | 19.51                | 24.99                | $2.11 \times 10^{12}$   | $6.67 \times 10^{12}$   |
| 1-OH               | 1.97           | 1.29           | 22.63                | 26.70                | $1.47 \times 10^{12}$   | $3.83 \times 10^{11}$   |
| 1-OCH <sub>3</sub> | 0.18           | 1.17           | 23.08                | 26.05                | $1.21 \times 10^{10}$   | $3.42 \times 10^{11}$   |
| 1-NH <sub>2</sub>  | 6.80           | 7.40           | 31.64                | 29.78                | $5.97 \times 10^{12}$   | $8.80 \times 10^{12}$   |
| 1-F                | 0.28           | 0.24           | 21.25                | 25.88                | $3.42 \times 10^{10}$   | $1.43 \times 10^{10}$   |
| 1-CN               | 1.76           | 8.01           | 20.45                | 23.27                | $1.54 \times 10^{12}$   | $2.25 \times 10^{13}$   |
| 1-NO <sub>2</sub>  | 1.93           | 17.30          | 20.29                | 30.73                | $1.89 \times 10^{12}$   | $4.30 \times 10^{13}$   |

**Table S19.** The electronic coupling terms, reorganization energies and transport rate constants of 1-H and its derivatives at V1 stacking pattern.

| Species            | $V_h$ / kJ/mol | $V_e$ / kJ/mol | $\lambda_h$ / kJ/mol | $\lambda_e$ / kJ/mol | $k_h$ / s <sup>-1</sup> | $k_e$ / s <sup>-1</sup> |
|--------------------|----------------|----------------|----------------------|----------------------|-------------------------|-------------------------|
| 1-H                | 1.29           | 3.14           | 18.54                | 23.33                | $1.05 \times 10^{12}$   | $3.42 \times 10^{12}$   |
| 1-CH <sub>3</sub>  | 1.89           | 3.05           | 19.51                | 24.99                | $2.00 \times 10^{12}$   | $2.64 \times 10^{12}$   |
| 1-OH               | 1.98           | 2.11           | 22.63                | 26.70                | $1.49 \times 10^{12}$   | $1.03 \times 10^{12}$   |
| 1-OCH <sub>3</sub> | 2.11           | 2.27           | 23.08                | 26.05                | $1.60 \times 10^{12}$   | $1.29 \times 10^{12}$   |
| 1-NH <sub>2</sub>  | 3.45           | 3.69           | 31.64                | 29.78                | $1.54 \times 10^{12}$   | $2.18 \times 10^{12}$   |
| 1-F                | 2.05           | 2.76           | 21.25                | 25.88                | $1.89 \times 10^{12}$   | $1.94 \times 10^{12}$   |
| 1-CN               | 1.76           | 0.83           | 20.45                | 23.27                | $1.54 \times 10^{12}$   | $2.40 \times 10^{11}$   |
| 1-NO <sub>2</sub>  | 3.15           | 4.28           | 20.29                | 30.73                | $5.03 \times 10^{12}$   | $2.63 \times 10^{12}$   |

**Table S20.** Cartesian coordinates for the optimized species at B3LYP/6-311G\*\* level.

1-H

Energy (with Zero-point Energy correction) = -1700.034584 (-1699.351007) Hartree

Free energy (298 K) = -1699.418396 Hartree

Zero number of imaginary frequency

0 1

|   |             |             |             |
|---|-------------|-------------|-------------|
| C | -1.36459900 | 1.69870100  | 0.40404000  |
| C | -0.66011000 | 2.93499800  | 0.27772500  |
| C | 0.66006100  | 2.93498600  | -0.27790500 |
| C | 1.36453800  | 1.69867700  | -0.40416000 |
| H | -2.19532400 | 4.19977700  | 1.13824800  |
| C | -1.23931500 | 4.18743800  | 0.63490500  |
| C | 1.23926700  | 4.18741300  | -0.63512900 |
| C | 0.61789100  | 5.37458800  | -0.34085900 |
| C | -0.61793900 | 5.37460200  | 0.34059100  |
| H | 2.19527300  | 4.19973600  | -1.13847600 |
| C | -3.45417100 | -2.04513300 | -0.79767000 |
| C | -2.77833600 | -0.83974100 | -0.52562000 |
| C | -1.43409800 | -0.78073900 | -0.15392300 |
| C | -0.70464900 | -1.99971600 | -0.12021100 |
| C | -1.38398600 | -3.23151500 | -0.31534600 |
| C | -2.74903500 | -3.22927500 | -0.65163800 |
| C | -0.71931000 | 0.49639300  | 0.08575900  |
| C | 0.70462100  | -1.99969500 | 0.12030600  |
| C | 1.43404200  | -0.78070200 | 0.15392600  |
| C | 0.71923300  | 0.49639200  | -0.08584200 |
| C | 2.77829000  | -0.83964000 | 0.52558900  |
| H | 3.32729800  | 0.08138600  | 0.62892500  |
| C | 3.45416400  | -2.04499400 | 0.79770500  |
| C | 2.74905100  | -3.22916400 | 0.65177300  |
| C | 1.38399400  | -3.23146200 | 0.31551100  |
| C | 0.65862600  | -4.45861200 | 0.16409700  |
| C | -0.65858900 | -4.45863700 | -0.16384700 |
| H | -1.19279200 | -5.39301200 | -0.30158000 |
| H | 1.19285200  | -5.39296500 | 0.30188200  |
| H | -3.32736500 | 0.08126000  | -0.62905200 |
| H | -3.22965600 | -4.18602500 | -0.81098100 |
| H | 3.22970200  | -4.18589200 | 0.81116100  |
| C | 4.93182800  | -2.00626500 | 1.22947600  |



|   |             |             |             |
|---|-------------|-------------|-------------|
| C | -4.93181600 | -2.00647500 | -1.22951200 |
| C | 2.75541500  | 1.74968600  | -0.95674700 |
| C | 3.79199300  | 2.43292000  | -0.30420000 |
| C | 3.02557200  | 1.16501700  | -2.20023600 |
| C | 5.05859200  | 2.52456700  | -0.87590200 |
| H | 3.60148700  | 2.89281500  | 0.65919700  |
| C | 4.29027900  | 1.26066200  | -2.77540700 |
| H | 2.23271000  | 0.63917400  | -2.71942300 |
| C | 5.31165700  | 1.94147000  | -2.11651200 |
| H | 5.84708400  | 3.05437100  | -0.35275000 |
| H | 4.47577800  | 0.80554000  | -3.74197900 |
| H | 6.29592600  | 2.01700300  | -2.56464900 |
| C | -2.75543800 | 1.74978500  | 0.95671400  |
| C | -3.02555100 | 1.16512100  | 2.20021500  |
| C | -3.79199400 | 2.43315700  | 0.30427700  |
| C | -4.29020200 | 1.26088100  | 2.77549000  |
| H | -2.23269800 | 0.63919200  | 2.71932700  |
| C | -5.05853600 | 2.52492400  | 0.87608600  |
| H | -3.60151200 | 2.89307600  | -0.65911400 |
| C | -5.31156200 | 1.94181400  | 2.11669800  |
| H | -4.47566800 | 0.80575600  | 3.74206800  |
| H | -5.84701200 | 3.05483300  | 0.35301700  |
| H | -6.29578600 | 2.01744000  | 2.56491900  |
| H | 1.08416500  | 6.31294600  | -0.61958400 |
| H | -1.08421400 | 6.31297000  | 0.61928000  |
| C | 5.47472200  | -3.40534800 | 1.57447900  |
| H | 6.51717700  | -3.32399100 | 1.89386000  |
| H | 4.91326900  | -3.87009700 | 2.38969100  |
| H | 5.44841400  | -4.07728400 | 0.71239900  |
| C | 5.78846200  | -1.42590300 | 0.08124500  |
| H | 5.71114000  | -2.04981000 | -0.81353300 |
| H | 5.47611200  | -0.41602400 | -0.18909600 |
| H | 6.84180300  | -1.38525500 | 0.37723100  |
| C | 5.08297800  | -1.11514800 | 2.48428300  |
| H | 4.48200700  | -1.50125400 | 3.31220200  |
| H | 6.12893700  | -1.09060600 | 2.80533700  |
| H | 4.77101600  | -0.08602700 | 2.29481800  |
| C | -5.47461000 | -3.40558000 | -1.57458900 |
| H | -6.51706000 | -3.32427700 | -1.89399900 |
| H | -4.91310300 | -3.87026000 | -2.38980200 |
| H | -5.44828500 | -4.07754900 | -0.71253600 |

|   |             |             |             |
|---|-------------|-------------|-------------|
| C | -5.08295400 | -1.11532500 | -2.48429800 |
| H | -4.48192600 | -1.50137500 | -3.31220200 |
| H | -6.12889900 | -1.09082400 | -2.80539800 |
| H | -4.77105000 | -0.08619500 | -2.29478300 |
| C | -5.78854500 | -1.42620600 | -0.08130600 |
| H | -5.71122800 | -2.05013600 | 0.81345600  |
| H | -5.47627500 | -0.41631600 | 0.18908300  |
| H | -6.84187300 | -1.38561600 | -0.37734400 |

1-CH<sub>3</sub>

Energy (with Zero-point Energy correction) = -1739.362765 (-1738.651944) Hartree

Free energy (298 K) = -1738.721546 Hartree

Zero number of imaginary frequency

0 1

|   |             |             |             |
|---|-------------|-------------|-------------|
| C | -1.32102400 | 1.58165900  | 0.45089100  |
| C | -0.55309900 | 2.77995200  | 0.35031900  |
| C | 0.76724700  | 2.72600600  | -0.19742100 |
| C | 1.40771900  | 1.45833100  | -0.34564300 |
| H | -2.01852000 | 4.11517400  | 1.22823400  |
| C | -1.06300000 | 4.05694400  | 0.72683000  |
| C | 1.41216200  | 3.95426600  | -0.52705500 |
| C | 0.86775000  | 5.17939100  | -0.22298300 |
| C | -0.37667300 | 5.21098000  | 0.45753600  |
| H | 2.37108300  | 3.91970200  | -1.02537800 |
| C | -3.59883900 | -2.02448300 | -0.82711100 |
| C | -2.86248300 | -0.86184000 | -0.52782000 |
| C | -1.51696000 | -0.87983200 | -0.15581200 |
| C | -0.85126400 | -2.13527100 | -0.14964900 |
| C | -1.59253900 | -3.32590600 | -0.37341500 |
| C | -2.95522800 | -3.24628100 | -0.70948600 |
| C | -0.73755300 | 0.35292000  | 0.11135200  |
| C | 0.55552200  | -2.21290700 | 0.09242900  |
| C | 1.34641900  | -1.03390700 | 0.15557300  |
| C | 0.69901500  | 0.28343900  | -0.05672900 |
| C | 2.68460800  | -1.17074400 | 0.52910900  |
| H | 3.27970700  | -0.28185700 | 0.65523800  |
| C | 3.29672500  | -2.41507500 | 0.77507800  |
| C | 2.53235100  | -3.55781900 | 0.60008400  |
| C | 1.17026400  | -3.48216800 | 0.26071800  |
| C | 0.38344400  | -4.66672700 | 0.07981300  |
| C | -0.93119300 | -4.59173400 | -0.24977500 |

|   |             |             |             |
|---|-------------|-------------|-------------|
| H | -1.51224100 | -5.49410700 | -0.40960200 |
| H | 0.86881400  | -5.63014300 | 0.19678900  |
| H | -3.36382800 | 0.08807700  | -0.60950600 |
| H | -3.48381700 | -4.17328300 | -0.89109600 |
| H | 2.96254500  | -4.54140900 | 0.73866800  |
| C | 4.77312100  | -2.46263700 | 1.21054400  |
| C | -5.07278400 | -1.90057100 | -1.25579700 |
| C | 2.80250300  | 1.44914900  | -0.89102400 |
| C | 3.87022500  | 2.05981400  | -0.21701600 |
| C | 3.04849400  | 0.88298300  | -2.14796500 |
| C | 5.14307800  | 2.09876700  | -0.78076000 |
| H | 3.69858300  | 2.50478800  | 0.75688800  |
| C | 4.31972200  | 0.92604500  | -2.71526800 |
| H | 2.23188300  | 0.41306400  | -2.68373400 |
| C | 5.37201800  | 1.53472800  | -2.03487900 |
| H | 5.95565600  | 2.57231500  | -0.24071400 |
| H | 4.48628800  | 0.48617400  | -3.69231600 |
| H | 6.36147500  | 1.56908500  | -2.47663500 |
| C | -2.70898300 | 1.69563600  | 1.00120600  |
| C | -3.01442300 | 1.10219300  | 2.23234900  |
| C | -3.70535900 | 2.44588600  | 0.35972400  |
| C | -4.27413300 | 1.25439400  | 2.80625200  |
| H | -2.25266800 | 0.52442000  | 2.74283500  |
| C | -4.96724900 | 2.59420900  | 0.93002100  |
| H | -3.48727200 | 2.91308200  | -0.59427300 |
| C | -5.25542300 | 2.00160400  | 2.15837900  |
| H | -4.48711000 | 0.79112300  | 3.76325600  |
| H | -5.72453800 | 3.17533700  | 0.41530300  |
| H | -6.23580100 | 2.12093200  | 2.60554600  |
| H | -0.79707900 | 6.16651100  | 0.75544900  |
| C | 5.24034200  | -3.89472900 | 1.53008000  |
| H | 6.28426600  | -3.87449100 | 1.85439300  |
| H | 4.65161600  | -4.34489300 | 2.33416600  |
| H | 5.18257600  | -4.54767300 | 0.65504300  |
| C | 5.66240400  | -1.90694900 | 0.07501400  |
| H | 5.55456800  | -2.50896300 | -0.83153200 |
| H | 5.40428900  | -0.87716200 | -0.17665700 |
| H | 6.71566400  | -1.92756700 | 0.37345000  |
| C | 4.96789200  | -1.60459900 | 2.48226900  |
| H | 4.34470200  | -1.97352100 | 3.30156100  |
| H | 6.01271700  | -1.64205000 | 2.80581000  |

|   |             |             |             |
|---|-------------|-------------|-------------|
| H | 4.71201100  | -0.55689000 | 2.31172300  |
| C | -5.68497100 | -3.26113500 | -1.63708300 |
| H | -6.72185400 | -3.11931500 | -1.95354600 |
| H | -5.14684700 | -3.73189100 | -2.46449500 |
| H | -5.69302000 | -3.95597700 | -0.79299100 |
| C | -5.17968300 | -0.96996500 | -2.48620100 |
| H | -4.59882600 | -1.36330500 | -3.32500700 |
| H | -6.22319600 | -0.88481700 | -2.80486900 |
| H | -4.81685700 | 0.03690200  | -2.26983300 |
| C | -5.89907600 | -1.30892700 | -0.09119000 |
| H | -5.85327200 | -1.95992000 | 0.78630400  |
| H | -5.53590200 | -0.32383100 | 0.20583500  |
| H | -6.94906700 | -1.20710900 | -0.38442700 |
| C | 1.56484600  | 6.46742600  | -0.58178000 |
| H | 1.74559900  | 7.08000700  | 0.30760400  |
| H | 2.52603700  | 6.28045200  | -1.06388700 |
| H | 0.95604800  | 7.06794000  | -1.26586600 |

1-OH

Energy (with Zero-point Energy correction) = -1775.277716 (-1774.590256) Hartree

Free energy (298 K) = -1774.659039 Hartree

Zero number of imaginary frequency

0 1

|   |             |             |             |
|---|-------------|-------------|-------------|
| C | -1.32786900 | 1.57886200  | 0.44161800  |
| C | -0.56784700 | 2.78265000  | 0.33815500  |
| C | 0.75580000  | 2.73960600  | -0.20992000 |
| C | 1.40279600  | 1.47257500  | -0.35650200 |
| H | -2.04812900 | 4.10546600  | 1.20799700  |
| C | -1.09063900 | 4.05312000  | 0.71030200  |
| C | 1.39866300  | 3.96302800  | -0.53720400 |
| C | 0.82647400  | 5.17314100  | -0.22549300 |
| C | -0.41708000 | 5.21699500  | 0.44462900  |
| H | 2.36410300  | 3.96599700  | -1.02071100 |
| C | -3.57980200 | -2.05150100 | -0.81829500 |
| C | -2.85260200 | -0.88123700 | -0.52567900 |
| C | -1.50673000 | -0.88604700 | -0.15459400 |
| C | -0.83103200 | -2.13617000 | -0.14327600 |
| C | -1.56246100 | -3.33384900 | -0.36104000 |
| C | -2.92627600 | -3.26740300 | -0.69592500 |
| C | -0.73700000 | 0.35364000  | 0.10771400  |
| C | 0.57657100  | -2.20101800 | 0.09874100  |

|   |             |             |             |
|---|-------------|-------------|-------------|
| C | 1.35819700  | -1.01562200 | 0.15657700  |
| C | 0.70114600  | 0.29632400  | -0.06212200 |
| C | 2.69714800  | -1.13963500 | 0.53134800  |
| H | 3.28486600  | -0.24517500 | 0.65275900  |
| C | 3.31942900  | -2.37773900 | 0.78326000  |
| C | 2.56438400  | -3.52729100 | 0.61292600  |
| C | 1.20174100  | -3.46436200 | 0.27282400  |
| C | 0.42482600  | -4.65619600 | 0.09722400  |
| C | -0.89049800 | -4.59354600 | -0.23222500 |
| H | -1.46407400 | -5.50142100 | -0.38787900 |
| H | 0.91823600  | -5.61502300 | 0.21824600  |
| H | -3.36189800 | 0.06398500  | -0.61260100 |
| H | -3.44722800 | -4.19962000 | -0.87278100 |
| H | 3.00258800  | -4.50675300 | 0.75579000  |
| C | 4.79601900  | -2.41112600 | 1.21915300  |
| C | -5.05503300 | -1.94153800 | -1.24644300 |
| C | 2.79539100  | 1.46999400  | -0.90688900 |
| C | 3.86214300  | 2.09220800  | -0.24201000 |
| C | 3.03932000  | 0.89741600  | -2.16140000 |
| C | 5.13197400  | 2.13571000  | -0.81198700 |
| H | 3.69251600  | 2.54391100  | 0.72908300  |
| C | 4.30769700  | 0.94431200  | -2.73457000 |
| H | 2.22314800  | 0.41944800  | -2.69068600 |
| C | 5.35898000  | 1.56435000  | -2.06307100 |
| H | 5.94330100  | 2.61989800  | -0.27967700 |
| H | 4.47250400  | 0.49944200  | -3.70965400 |
| H | 6.34597800  | 1.60307900  | -2.50992400 |
| C | -2.71739400 | 1.68708500  | 0.98925300  |
| C | -3.01987600 | 1.10095100  | 2.22459600  |
| C | -3.71845400 | 2.42527600  | 0.34097800  |
| C | -4.28121100 | 1.24884800  | 2.79609300  |
| H | -2.25465600 | 0.53200400  | 2.73972900  |
| C | -4.98198500 | 2.56920300  | 0.90892300  |
| H | -3.50317900 | 2.88500400  | -0.61734400 |
| C | -5.26708400 | 1.98424800  | 2.14165000  |
| H | -4.49202600 | 0.79114000  | 3.75623700  |
| H | -5.74322700 | 3.14003400  | 0.38851500  |
| H | -6.24883500 | 2.09974600  | 2.58679300  |
| H | -0.84137400 | 6.17281200  | 0.73927800  |
| C | 5.27502900  | -3.83795200 | 1.54468700  |
| H | 6.31872300  | -3.80768300 | 1.86895300  |

|   |             |             |             |
|---|-------------|-------------|-------------|
| H | 4.68999200  | -4.28965400 | 2.35062600  |
| H | 5.22276600  | -4.49497300 | 0.67235100  |
| C | 5.68084500  | -1.85263600 | 0.08150800  |
| H | 5.57827700  | -2.45924800 | -0.82257700 |
| H | 5.41429200  | -0.82608800 | -0.17453400 |
| H | 6.73415500  | -1.86323700 | 0.38028000  |
| C | 4.98321100  | -1.54621700 | 2.48737300  |
| H | 4.36297100  | -1.91703100 | 3.30807400  |
| H | 6.02825000  | -1.57348700 | 2.81123000  |
| H | 4.71858500  | -0.50142400 | 2.31237500  |
| C | -5.65749600 | -3.30918500 | -1.61771100 |
| H | -6.69581000 | -3.17732000 | -1.93384500 |
| H | -5.11684600 | -3.78147800 | -2.44257400 |
| H | -5.65914000 | -3.99828100 | -0.76889100 |
| C | -5.16986600 | -1.02036800 | -2.48322800 |
| H | -4.58677900 | -1.41532000 | -3.31971000 |
| H | -6.21424100 | -0.94504300 | -2.80163600 |
| H | -4.81401500 | -0.00944600 | -2.27422500 |
| C | -5.88497500 | -1.34808100 | -0.08536200 |
| H | -5.83348500 | -1.99256800 | 0.79661000  |
| H | -5.52908600 | -0.35819000 | 0.20446200  |
| H | -6.93595600 | -1.25632600 | -0.37842700 |
| O | 1.50065200  | 6.31364400  | -0.56191900 |
| H | 0.98206500  | 7.07873000  | -0.29387600 |

1-OCH<sub>3</sub>

Energy (with Zero-point Energy correction) = -1814.587124 (-1813.871451) Hartree

Free energy (298 K) = -1813.942261 Hartree

Zero number of imaginary frequency

0 1

|   |             |             |             |
|---|-------------|-------------|-------------|
| C | -1.26569500 | 1.46084800  | 0.46006100  |
| C | -0.43279900 | 2.61755400  | 0.36435200  |
| C | 0.88547900  | 2.49668000  | -0.18540000 |
| C | 1.45441000  | 1.19196500  | -0.34093300 |
| H | -1.82631100 | 4.02292000  | 1.23916200  |
| C | -0.87328400 | 3.91419200  | 0.74173400  |
| C | 1.59876700  | 3.67896900  | -0.50165300 |
| C | 1.10611600  | 4.92733100  | -0.18533700 |
| C | -0.13356600 | 5.04319300  | 0.48488900  |
| H | 2.56389900  | 3.62869800  | -0.98331100 |
| C | -3.73541400 | -2.01387300 | -0.83013600 |

|   |             |             |             |
|---|-------------|-------------|-------------|
| C | -2.93805400 | -0.89297200 | -0.52697200 |
| C | -1.59514000 | -0.98318800 | -0.15630000 |
| C | -0.99728500 | -2.27246000 | -0.15585900 |
| C | -1.80039800 | -3.42109200 | -0.38478800 |
| C | -3.15740700 | -3.26841400 | -0.71946900 |
| C | -0.75127300 | 0.20521200  | 0.11675400  |
| C | 0.40348500  | -2.42584700 | 0.08693000  |
| C | 1.25645400  | -1.29137300 | 0.15534200  |
| C | 0.68202600  | 0.06046100  | -0.05478200 |
| C | 2.58440800  | -1.50057200 | 0.53108100  |
| H | 3.22602900  | -0.64497400 | 0.65996000  |
| C | 3.12876200  | -2.77665400 | 0.77438300  |
| C | 2.30489300  | -3.87612600 | 0.59339800  |
| C | 0.94942700  | -3.72659900 | 0.25134900  |
| C | 0.10118900  | -4.86692000 | 0.06420500  |
| C | -1.20715000 | -4.72072800 | -0.26657800 |
| H | -1.83509500 | -5.59028400 | -0.43098400 |
| H | 0.53455500  | -5.85525600 | 0.17758300  |
| H | -3.38876500 | 0.08225200  | -0.60467300 |
| H | -3.73410900 | -4.16542800 | -0.90512300 |
| H | 2.68145400  | -4.88188100 | 0.72920300  |
| C | 4.59952600  | -2.90430900 | 1.21263100  |
| C | -5.20138000 | -1.80998900 | -1.25561800 |
| C | 2.84525900  | 1.10868500  | -0.88878800 |
| C | 3.94620400  | 1.66110800  | -0.21790400 |
| C | 3.05726400  | 0.52999400  | -2.14632300 |
| C | 5.21781600  | 1.63070200  | -0.78473700 |
| H | 3.80181600  | 2.11624200  | 0.75564900  |
| C | 4.32759700  | 0.50324400  | -2.71641700 |
| H | 2.21492300  | 0.10553700  | -2.68020000 |
| C | 5.41293600  | 1.05410400  | -2.03879700 |
| H | 6.05576400  | 2.06120500  | -0.24752800 |
| H | 4.46758800  | 0.05505300  | -3.69386900 |
| H | 6.40163900  | 1.03525800  | -2.48318700 |
| C | -2.64626200 | 1.65105700  | 1.00771700  |
| C | -2.98553500 | 1.07590200  | 2.23866300  |
| C | -3.59940400 | 2.45405300  | 0.36420500  |
| C | -4.23615500 | 1.29657700  | 2.81025500  |
| H | -2.25710500 | 0.45757800  | 2.75022500  |
| C | -4.85252400 | 2.67073100  | 0.93208000  |
| H | -3.35494300 | 2.90711000  | -0.59025600 |

|   |             |             |             |
|---|-------------|-------------|-------------|
| C | -5.17449000 | 2.09533800  | 2.16025500  |
| H | -4.47570700 | 0.84582500  | 3.76695700  |
| H | -5.57674400 | 3.29088700  | 0.41526800  |
| H | -6.14793400 | 2.26739500  | 2.60540100  |
| H | -0.51484100 | 6.00823400  | 0.79037600  |
| C | 4.98812600  | -4.36001600 | 1.53071500  |
| H | 6.03080400  | -4.39666900 | 1.85765000  |
| H | 4.37384200  | -4.77919100 | 2.33245600  |
| H | 4.89754700  | -5.00739300 | 0.65432200  |
| C | 5.51968900  | -2.39549700 | 0.07973600  |
| H | 5.38164700  | -2.98965400 | -0.82789300 |
| H | 5.31762700  | -1.35305200 | -0.17103200 |
| H | 6.56970900  | -2.47288100 | 0.38029400  |
| C | 4.83764100  | -2.05993200 | 2.48608900  |
| H | 4.19397400  | -2.39609200 | 3.30367200  |
| H | 5.87833900  | -2.15389800 | 2.81144000  |
| H | 4.63875200  | -0.99977100 | 2.31664600  |
| C | -5.88515700 | -3.13421600 | -1.64321500 |
| H | -6.91357200 | -2.93616000 | -1.95719000 |
| H | -5.37369500 | -3.62816800 | -2.47399600 |
| H | -5.92863200 | -3.83227600 | -0.80287400 |
| C | -5.26127300 | -0.86833000 | -2.48080100 |
| H | -4.70284100 | -1.28685500 | -3.32263100 |
| H | -6.29938400 | -0.72713100 | -2.79732200 |
| H | -4.84606500 | 0.11701400  | -2.25965200 |
| C | -5.99350400 | -1.18208500 | -0.08629200 |
| H | -5.98096500 | -1.83966000 | 0.78739900  |
| H | -5.57782100 | -0.21949200 | 0.21562000  |
| H | -7.03706900 | -1.02287300 | -0.37700200 |
| O | 1.88450500  | 5.99227400  | -0.53659600 |
| C | 1.42816900  | 7.30334200  | -0.23647000 |
| H | 0.47450100  | 7.52300500  | -0.72939800 |
| H | 1.32387400  | 7.45935500  | 0.84321300  |
| H | 2.19231600  | 7.97696700  | -0.62113300 |

1-NH<sub>2</sub>

Energy (with Zero-point Energy correction) = -1755.408791 (-1754.708778) Hartree

Free energy (298 K) = -1754.777655 Hartree

Zero number of imaginary frequency

0 1

|   |             |            |            |
|---|-------------|------------|------------|
| C | -1.32370500 | 1.58085600 | 0.44447900 |
|---|-------------|------------|------------|



|   |             |             |             |
|---|-------------|-------------|-------------|
| C | -0.56113700 | 2.78025600  | 0.34108400  |
| C | 0.76216700  | 2.73536800  | -0.20537500 |
| C | 1.40570900  | 1.46642400  | -0.34759800 |
| H | -2.03243000 | 4.11352400  | 1.21227200  |
| C | -1.07683800 | 4.05677200  | 0.71088700  |
| C | 1.40363200  | 3.95779200  | -0.53947900 |
| C | 0.84435600  | 5.18422100  | -0.23774700 |
| C | -0.40188200 | 5.21572700  | 0.44380600  |
| H | 2.36941000  | 3.93120400  | -1.02558400 |
| C | -3.59108800 | -2.03873500 | -0.82216100 |
| C | -2.85946200 | -0.87271200 | -0.52443800 |
| C | -1.51230600 | -0.88333400 | -0.15675600 |
| C | -0.84129200 | -2.13635800 | -0.15435300 |
| C | -1.57707000 | -3.33029200 | -0.37870600 |
| C | -2.94135800 | -3.25776300 | -0.71000000 |
| C | -0.73765900 | 0.35162700  | 0.10948800  |
| C | 0.56606800  | -2.20749200 | 0.08674300  |
| C | 1.35144500  | -1.02477800 | 0.15318000  |
| C | 0.69919500  | 0.29046200  | -0.06008900 |
| C | 2.68926700  | -1.15616000 | 0.53012700  |
| H | 3.27937600  | -0.26451700 | 0.66005500  |
| C | 3.30709600  | -2.39790000 | 0.77475400  |
| C | 2.54893500  | -3.54396600 | 0.59479400  |
| C | 1.18709400  | -3.47409300 | 0.25316400  |
| C | 0.40633200  | -4.66215800 | 0.06936100  |
| C | -0.90893300 | -4.59292600 | -0.25900900 |
| H | -1.48563900 | -5.49790700 | -0.42013100 |
| H | 0.89660100  | -5.62341900 | 0.18400000  |
| H | -3.36610800 | 0.07453800  | -0.60427500 |
| H | -3.46563200 | -4.18719500 | -0.89161200 |
| H | 2.98358900  | -4.52585400 | 0.73182300  |
| C | 4.78252300  | -2.43915200 | 1.21419000  |
| C | -5.06750000 | -1.92128600 | -1.24449500 |
| C | 2.80221800  | 1.46247700  | -0.88851600 |
| C | 3.86570700  | 2.07692900  | -0.21063900 |
| C | 3.05527700  | 0.90010500  | -2.14586800 |
| C | 5.14021100  | 2.12218700  | -0.77020700 |
| H | 3.68874200  | 2.52027000  | 0.76304500  |
| C | 4.32837500  | 0.94868000  | -2.70896100 |
| H | 2.24233700  | 0.42727900  | -2.68471900 |
| C | 5.37597300  | 1.56074900  | -2.02445200 |

|   |             |             |             |
|---|-------------|-------------|-------------|
| H | 5.94922200  | 2.59753100  | -0.22624100 |
| H | 4.50011900  | 0.50983800  | -3.68565300 |
| H | 6.36705300  | 1.59888500  | -2.46239100 |
| C | -2.71145700 | 1.69217600  | 0.99617100  |
| C | -3.01282000 | 1.10277000  | 2.23027000  |
| C | -3.71193800 | 2.43576700  | 0.35331100  |
| C | -4.27211100 | 1.25272700  | 2.80564800  |
| H | -2.24794400 | 0.52975700  | 2.74137600  |
| C | -4.97354800 | 2.58181800  | 0.92500600  |
| H | -3.49734000 | 2.89849500  | -0.60368100 |
| C | -5.25742400 | 1.99350400  | 2.15638900  |
| H | -4.48179700 | 0.79252500  | 3.76487700  |
| H | -5.73420100 | 3.15723600  | 0.40873900  |
| H | -6.23760100 | 2.11072000  | 2.60460300  |
| H | -0.81946900 | 6.17063300  | 0.74706300  |
| C | 5.25592600  | -3.86957500 | 1.53216100  |
| H | 6.29885600  | -3.84490300 | 1.85947600  |
| H | 4.66704500  | -4.32423600 | 2.33359900  |
| H | 5.20371600  | -4.52101600 | 0.65564700  |
| C | 5.67234500  | -1.87684800 | 0.08237300  |
| H | 5.57012700  | -2.47775600 | -0.82557900 |
| H | 5.40949700  | -0.84800300 | -0.16817700 |
| H | 6.72489900  | -1.89258100 | 0.38377100  |
| C | 4.96971400  | -1.58281800 | 2.48819300  |
| H | 4.34612500  | -1.95658300 | 3.30498700  |
| H | 6.01388000  | -1.61566200 | 2.81450800  |
| H | 4.70886100  | -0.53611300 | 2.31913600  |
| C | -5.67542500 | -3.28433400 | -1.62378300 |
| H | -6.71447300 | -3.14708700 | -1.93530500 |
| H | -5.13892400 | -3.75216700 | -2.45389500 |
| H | -5.67610200 | -3.97965800 | -0.78006300 |
| C | -5.18419400 | -0.99072300 | -2.47404200 |
| H | -4.60513400 | -1.38120600 | -3.31544100 |
| H | -6.22951300 | -0.91011200 | -2.78818100 |
| H | -4.82468400 | 0.01755500  | -2.25874200 |
| C | -5.89167100 | -1.33393000 | -0.07623200 |
| H | -5.83886400 | -1.98503300 | 0.80079100  |
| H | -5.53167500 | -0.34732900 | 0.21960000  |
| H | -6.94348300 | -1.23692300 | -0.36478300 |
| N | 1.50587300  | 6.38030900  | -0.50900600 |
| H | 2.22719600  | 6.32504000  | -1.21303000 |

|   |            |            |             |
|---|------------|------------|-------------|
| H | 0.91077900 | 7.18572500 | -0.63486800 |
|---|------------|------------|-------------|

1-F

Energy (with Zero-point Energy correction) = -1799.299373 (-1798.624152) Hartree

Free energy (298 K) = -1798.692717 Hartree

Zero number of imaginary frequency

0 1

|   |             |             |             |
|---|-------------|-------------|-------------|
| C | -1.32965400 | 1.58035300  | 0.44152800  |
| C | -0.57191300 | 2.78607100  | 0.33795900  |
| C | 0.75221100  | 2.73878400  | -0.20794000 |
| C | 1.40204400  | 1.47597900  | -0.35515600 |
| H | -2.05987900 | 4.10243300  | 1.20689400  |
| C | -1.10144400 | 4.05593500  | 0.71097500  |
| C | 1.39499600  | 3.96660100  | -0.53587200 |
| C | 0.80241800  | 5.15312200  | -0.21563700 |
| C | -0.43365200 | 5.22397700  | 0.44609800  |
| H | 2.35983600  | 3.97915800  | -1.02027100 |
| C | -3.57551000 | -2.05237700 | -0.81928700 |
| C | -2.84976000 | -0.88125900 | -0.52670700 |
| C | -1.50450800 | -0.88516700 | -0.15386000 |
| C | -0.82739000 | -2.13432800 | -0.13980000 |
| C | -1.55774300 | -3.33289600 | -0.35635800 |
| C | -2.92097300 | -3.26744600 | -0.69340000 |
| C | -0.73597200 | 0.35598600  | 0.10699700  |
| C | 0.58006600  | -2.19800700 | 0.10234800  |
| C | 1.36086500  | -1.01216100 | 0.15817600  |
| C | 0.70185900  | 0.29826700  | -0.05994800 |
| C | 2.70075100  | -1.13412600 | 0.53026900  |
| H | 3.28809200  | -0.23917900 | 0.64983500  |
| C | 3.32437200  | -2.37137300 | 0.78267500  |
| C | 2.56957700  | -3.52163900 | 0.61544400  |
| C | 1.20638900  | -3.46058300 | 0.27731300  |
| C | 0.43027300  | -4.65329500 | 0.10410200  |
| C | -0.88512000 | -4.59200600 | -0.22521400 |
| H | -1.45808900 | -5.50043800 | -0.37947000 |
| H | 0.92432900  | -5.61155500 | 0.22647500  |
| H | -3.35974500 | 0.06342300  | -0.61499500 |
| H | -3.44118000 | -4.20019900 | -0.86953400 |
| H | 3.00890900  | -4.50044500 | 0.75909300  |
| C | 4.80168200  | -2.40308900 | 1.21612100  |
| C | -5.04997600 | -1.94451000 | -1.25035600 |

|   |             |             |             |
|---|-------------|-------------|-------------|
| C | 2.79381500  | 1.47743800  | -0.90751600 |
| C | 3.85940700  | 2.10226100  | -0.24322900 |
| C | 3.03690400  | 0.90730000  | -2.16332400 |
| C | 5.12798300  | 2.15150100  | -0.81583500 |
| H | 3.69091600  | 2.54977100  | 0.73010200  |
| C | 4.30392000  | 0.96007300  | -2.73877800 |
| H | 2.22160200  | 0.42693100  | -2.69174100 |
| C | 5.35418800  | 1.58316500  | -2.06834300 |
| H | 5.93872400  | 2.63721500  | -0.28415500 |
| H | 4.46854100  | 0.51746100  | -3.71484800 |
| H | 6.34002100  | 1.62630400  | -2.51720400 |
| C | -2.71943200 | 1.68493300  | 0.98936800  |
| C | -3.01923700 | 1.09846000  | 2.22513700  |
| C | -3.72255000 | 2.42007500  | 0.34088700  |
| C | -4.28063100 | 1.24340000  | 2.79721400  |
| H | -2.25226800 | 0.53218000  | 2.74062800  |
| C | -4.98600000 | 2.56098400  | 0.90960900  |
| H | -3.50928300 | 2.88057200  | -0.61752600 |
| C | -5.26864200 | 1.97590600  | 2.14283700  |
| H | -4.48958400 | 0.78609600  | 3.75790400  |
| H | -5.74869100 | 3.13023400  | 0.38975900  |
| H | -6.25019400 | 2.08963100  | 2.58876100  |
| H | -0.83739200 | 6.18964000  | 0.72349100  |
| C | 5.28317100  | -3.82955400 | 1.53946100  |
| H | 6.32746100  | -3.79815500 | 1.86151200  |
| H | 4.70064500  | -4.28263900 | 2.34641800  |
| H | 5.22997600  | -4.48598500 | 0.66674000  |
| C | 5.68382000  | -1.84227500 | 0.07750500  |
| H | 5.58065800  | -2.44798600 | -0.82710100 |
| H | 5.41576900  | -0.81565500 | -0.17687500 |
| H | 6.73754300  | -1.85187000 | 0.37456800  |
| C | 4.98938000  | -1.53900600 | 2.48483300  |
| H | 4.37115600  | -1.91153400 | 3.30624500  |
| H | 6.03491500  | -1.56485600 | 2.80698800  |
| H | 4.72286200  | -0.49440500 | 2.31134500  |
| C | -5.64956300 | -3.31313500 | -1.62264100 |
| H | -6.68728000 | -3.18273800 | -1.94112600 |
| H | -5.10653500 | -3.78485100 | -2.44627500 |
| H | -5.65244000 | -4.00209100 | -0.77371100 |
| C | -5.16354200 | -1.02358100 | -2.48743600 |
| H | -4.57829900 | -1.41762200 | -3.32282800 |

|   |             |             |             |
|---|-------------|-------------|-------------|
| H | -6.20733900 | -0.94999900 | -2.80786000 |
| H | -4.81005300 | -0.01191700 | -2.27793800 |
| C | -5.88275000 | -1.35209900 | -0.09076600 |
| H | -5.83210700 | -1.99632600 | 0.79143000  |
| H | -5.52896300 | -0.36156200 | 0.19947100  |
| H | -6.93323000 | -1.26190600 | -0.38583300 |
| F | 1.42620100  | 6.31365900  | -0.52501100 |

1-CN

Energy (with Zero-point Energy correction) = -1792.300579 (-1791.618345) Hartree

Free energy (298 K) = -1791.688272 Hartree

Zero number of imaginary frequency

0 1

|   |             |             |             |
|---|-------------|-------------|-------------|
| C | -1.26779400 | 1.55060600  | 0.48218800  |
| C | -0.43548400 | 2.70531500  | 0.39871000  |
| C | 0.88124500  | 2.58180600  | -0.15155000 |
| C | 1.45488800  | 1.28370800  | -0.31736400 |
| H | -1.82804000 | 4.09869200  | 1.30397400  |
| C | -0.87832500 | 4.00093000  | 0.79855300  |
| C | 1.59163700  | 3.76882700  | -0.47208800 |
| C | 1.09709700  | 5.01446700  | -0.14020000 |
| C | -0.14103400 | 5.12517800  | 0.54731000  |
| H | 2.54433400  | 3.70115100  | -0.97579500 |
| C | -3.73254600 | -1.90462300 | -0.85663000 |
| C | -2.93518000 | -0.78848300 | -0.53806300 |
| C | -1.59430600 | -0.88678100 | -0.16201200 |
| C | -0.99779500 | -2.17656400 | -0.16785500 |
| C | -1.80255300 | -3.32128600 | -0.40932700 |
| C | -3.15671900 | -3.16103600 | -0.75127500 |
| C | -0.75000900 | 0.29731400  | 0.12287200  |
| C | 0.40084400  | -2.33542800 | 0.07999900  |
| C | 1.25603900  | -1.20396900 | 0.16041100  |
| C | 0.68267300  | 0.14862400  | -0.03786400 |
| C | 2.58356300  | -1.41711800 | 0.53498400  |
| H | 3.22705000  | -0.56393500 | 0.67099100  |
| C | 3.12456200  | -2.69617400 | 0.76943600  |
| C | 2.29791800  | -3.79230500 | 0.57896900  |
| C | 0.94344100  | -3.63843600 | 0.23531500  |
| C | 0.09317800  | -4.77537600 | 0.03674400  |
| C | -1.21345600 | -4.62348900 | -0.29805100 |
| H | -1.84278200 | -5.49005200 | -0.47171300 |

|   |             |             |             |
|---|-------------|-------------|-------------|
| H | 0.52359700  | -5.76550100 | 0.14418000  |
| H | -3.38325500 | 0.18851700  | -0.60816100 |
| H | -3.73488400 | -4.05479700 | -0.94756400 |
| H | 2.67277400  | -4.79950000 | 0.70795900  |
| C | 4.59412400  | -2.83049800 | 1.20933600  |
| C | -5.19500200 | -1.69493200 | -1.29074400 |
| C | 2.84582600  | 1.20618600  | -0.86494300 |
| C | 3.94351000  | 1.75963800  | -0.18970900 |
| C | 3.05876600  | 0.63325900  | -2.12497300 |
| C | 5.21518500  | 1.73804100  | -0.75717700 |
| H | 3.79863800  | 2.20674500  | 0.78765600  |
| C | 4.32905300  | 0.61618300  | -2.69488900 |
| H | 2.21866400  | 0.20773300  | -2.66144200 |
| C | 5.41165900  | 1.16912500  | -2.01423300 |
| H | 6.05084600  | 2.17064700  | -0.21861700 |
| H | 4.47115800  | 0.17492900  | -3.67499100 |
| H | 6.39983500  | 1.15871500  | -2.45962800 |
| C | -2.64799200 | 1.73158100  | 1.03413200  |
| C | -2.98423600 | 1.13932400  | 2.25766800  |
| C | -3.60171400 | 2.54238500  | 0.40168600  |
| C | -4.23417400 | 1.35188500  | 2.83361400  |
| H | -2.25504000 | 0.51526900  | 2.76117900  |
| C | -4.85394200 | 2.75091200  | 0.97441900  |
| H | -3.35955700 | 3.00886900  | -0.54692900 |
| C | -5.17342100 | 2.15885800  | 2.19522900  |
| H | -4.47203200 | 0.88916600  | 3.78486500  |
| H | -5.57861900 | 3.37845600  | 0.46763300  |
| H | -6.14586100 | 2.32532000  | 2.64439200  |
| H | -0.49691700 | 6.10061000  | 0.85419000  |
| C | 4.97997700  | -4.29015300 | 1.51200900  |
| H | 6.02196000  | -4.33168000 | 1.84006500  |
| H | 4.36439900  | -4.71719700 | 2.30855800  |
| H | 4.89021600  | -4.92792300 | 0.62851800  |
| C | 5.51708100  | -2.31028300 | 0.08384800  |
| H | 5.38019100  | -2.89360600 | -0.83091300 |
| H | 5.31802600  | -1.26437700 | -0.15503800 |
| H | 6.56607700  | -2.39301800 | 0.38575900  |
| C | 4.82975500  | -2.00019900 | 2.49251600  |
| H | 4.18408100  | -2.34446300 | 3.30506700  |
| H | 5.86941300  | -2.09892900 | 2.81913700  |
| H | 4.63297600  | -0.93781200 | 2.33446800  |

|   |             |             |             |
|---|-------------|-------------|-------------|
| C | -5.87714800 | -3.01490300 | -1.69519700 |
| H | -6.90258500 | -2.81251400 | -2.01550600 |
| H | -5.36024700 | -3.50224100 | -2.52651600 |
| H | -5.92885700 | -3.72025100 | -0.86143400 |
| C | -5.24414300 | -0.74198400 | -2.50766100 |
| H | -4.68028100 | -1.15327800 | -3.34938600 |
| H | -6.27956700 | -0.59680100 | -2.83041300 |
| H | -4.83013700 | 0.24122600  | -2.27473900 |
| C | -5.99426700 | -1.07664900 | -0.12109200 |
| H | -5.98889500 | -1.74181100 | 0.74686200  |
| H | -5.58029200 | -0.11684100 | 0.19206000  |
| H | -7.03534600 | -0.91388500 | -0.41791300 |
| C | 1.83759200  | 6.19246900  | -0.46961200 |
| N | 2.42838900  | 7.15123800  | -0.72934800 |

1-NO<sub>2</sub>

Energy (with Zero-point Energy correction) = -1904.592597 (-1903.906766) Hartree

Free energy (298 K) = -1903.97846 Hartree

Zero number of imaginary frequency

0 1

|   |             |             |             |
|---|-------------|-------------|-------------|
| C | 1.52210900  | 0.90944900  | -0.28820300 |
| C | 1.11382100  | 2.26659900  | -0.10847200 |
| C | -0.18147800 | 2.55042000  | 0.43644300  |
| C | -1.15106200 | 1.50804100  | 0.50408400  |
| H | 2.91682300  | 3.20141800  | -0.90515500 |
| C | 1.97120500  | 3.35718000  | -0.41015400 |
| C | -0.46285400 | 3.88810200  | 0.84779700  |
| C | 0.41027200  | 4.91592800  | 0.61423200  |
| C | 1.61497600  | 4.63267100  | -0.05888800 |
| H | -1.39661100 | 4.09834700  | 1.34823800  |
| C | 2.67945900  | -3.25393300 | 0.77355000  |
| C | 2.30291600  | -1.91611900 | 0.54558900  |
| C | 1.01325000  | -1.53728500 | 0.16995000  |
| C | 0.02382600  | -2.55259200 | 0.08095000  |
| C | 0.39879100  | -3.91388700 | 0.23083100  |
| C | 1.72266000  | -4.23728500 | 0.57612300  |
| C | 0.61342000  | -0.12279100 | -0.02001600 |
| C | -1.34266200 | -2.21887900 | -0.17175400 |
| C | -1.77330100 | -0.86463300 | -0.16261000 |
| C | -0.79008100 | 0.20281100  | 0.13524200  |
| C | -3.08842700 | -0.59703800 | -0.54728400 |

|   |             |             |             |
|---|-------------|-------------|-------------|
| H | -3.40939900 | 0.42889600  | -0.61642000 |
| C | -4.01707400 | -1.60308000 | -0.87631100 |
| C | -3.60428700 | -2.92225200 | -0.77160500 |
| C | -2.28315400 | -3.25269000 | -0.42249500 |
| C | -1.86241800 | -4.61889100 | -0.31442300 |
| C | -0.58642100 | -4.93456100 | 0.02430100  |
| H | -0.28379200 | -5.97122800 | 0.12849700  |
| H | -2.59450300 | -5.39909200 | -0.49455200 |
| H | 3.04732700  | -1.15035400 | 0.68725500  |
| H | 1.96869200  | -5.28402000 | 0.70025700  |
| H | -4.28896900 | -3.73558900 | -0.97491700 |
| C | -5.43778100 | -1.20988700 | -1.32138500 |
| C | 4.11962500  | -3.57268400 | 1.21550900  |
| C | -2.50167300 | 1.85286400  | 1.05136700  |
| C | -3.34359200 | 2.78227400  | 0.42351600  |
| C | -2.91602100 | 1.29412500  | 2.26667900  |
| C | -4.56338900 | 3.13900600  | 0.99307400  |
| H | -3.03990600 | 3.22508900  | -0.51871600 |
| C | -4.13317600 | 1.65438800  | 2.83935300  |
| H | -2.27300600 | 0.57922300  | 2.76684100  |
| C | -4.96099800 | 2.57865300  | 2.20585500  |
| H | -5.20129000 | 3.85732400  | 0.49022500  |
| H | -4.43210100 | 1.21505900  | 3.78443300  |
| H | -5.90761600 | 2.86035100  | 2.65265400  |
| C | 2.89176400  | 0.66395200  | -0.83855900 |
| C | 3.02911600  | 0.07035000  | -2.09970100 |
| C | 4.05052500  | 1.07799900  | -0.16595100 |
| C | 4.28598000  | -0.10146300 | -2.67310000 |
| H | 2.14169300  | -0.24805100 | -2.63422700 |
| C | 5.30827400  | 0.90155500  | -0.73724300 |
| H | 3.96488600  | 1.53852400  | 0.81207200  |
| C | 5.42995800  | 0.31422300  | -1.99503600 |
| H | 4.37029900  | -0.55510900 | -3.65420600 |
| H | 6.19178200  | 1.23006100  | -0.20170800 |
| H | 6.40808500  | 0.18446900  | -2.44378100 |
| H | 0.19578900  | 5.93013100  | 0.91850700  |
| C | 5.10423400  | -3.15753600 | 0.09864200  |
| H | 4.90059500  | -3.70935700 | -0.82320200 |
| H | 5.03681100  | -2.09246000 | -0.12877600 |
| H | 6.13371200  | -3.37220000 | 0.40265800  |
| C | 4.32197900  | -5.07186700 | 1.50272100  |



|   |             |             |             |
|---|-------------|-------------|-------------|
| H | 5.35025200  | -5.24487900 | 1.83095600  |
| H | 3.65708900  | -5.42830900 | 2.29435000  |
| H | 4.15596200  | -5.68420700 | 0.61229400  |
| C | 4.44986500  | -2.79136200 | 2.50860200  |
| H | 3.76302500  | -3.06209900 | 3.31520500  |
| H | 5.46797300  | -3.02086300 | 2.83737300  |
| H | 4.38610000  | -1.71118800 | 2.36163500  |
| C | -5.35535300 | -0.25996600 | -2.53892300 |
| H | -6.36113900 | 0.01628300  | -2.86967000 |
| H | -4.82043900 | 0.66238600  | -2.30308600 |
| H | -4.84245900 | -0.74114100 | -3.37618700 |
| C | -6.27905200 | -2.43288000 | -1.73070900 |
| H | -7.26823500 | -2.10218100 | -2.05810100 |
| H | -5.82257200 | -2.98238600 | -2.55861200 |
| H | -6.42551500 | -3.12537100 | -0.89741300 |
| C | -6.16093100 | -0.49327600 | -0.15832200 |
| H | -6.24635300 | -1.15205700 | 0.71031000  |
| H | -5.63138900 | 0.40710600  | 0.15719000  |
| H | -7.17075700 | -0.20063100 | -0.46328400 |
| N | 2.53191500  | 5.74297000  | -0.38003100 |
| O | 2.18820300  | 6.87100300  | -0.04596900 |
| O | 3.57913500  | 5.47834600  | -0.95757100 |
